# Supplementary material for: Pragmatic evaluation of a coproduced physical activity referral scheme: a UK quasi-experimental study
Source: PubMed Central journal article supplement — BMJ Open. 2020 Oct 1;10(10):e034580. doi: 10.1136/bmjopen-2019-034580 (PMC7534707; doi:10.1136/bmjopen-2019-034580), 2020-10-01
Supplement: bmjopen-2019-034580.draft_revisions.pdf [file bmjopen-2019-034580.draft_revisions.pdf]

# BMJ Open

BMJ Open is committed to open peer review. As part of this commitment we make the peer review history of every article we publish publicly available.

When an article is published we post the peer reviewers' comments and the authors' responses online. We also post the versions of the paper that were used during peer review. These are the versions that the peer review comments apply to.

The versions of the paper that follow are the versions that were submitted during the peer review process. They are not the versions of record or the final published versions. They should not be cited or distributed as the published version of this manuscript.

BMJ Open is an open access journal and the full, final, typeset and author-corrected version of record of the manuscript is available on our site with no access controls, subscription charges or pay-per-view fees (<http://bmjopen.bmj.com>).

If you have any questions on BMJ Open's open peer review process please email [info.bmjopen@bmj.com](mailto:info.bmjopen@bmj.com)

# BMJ Open

## Pragmatic evaluation of a co-produced physical activity referral scheme: A quasi-experimental study

|                               |                                                                                                                                                                                                                                                                                                                                                                                                                                                                                                                                                                                                                                                                                                                                                  |
|-------------------------------|--------------------------------------------------------------------------------------------------------------------------------------------------------------------------------------------------------------------------------------------------------------------------------------------------------------------------------------------------------------------------------------------------------------------------------------------------------------------------------------------------------------------------------------------------------------------------------------------------------------------------------------------------------------------------------------------------------------------------------------------------|
| Journal:                      | <i>BMJ Open</i>                                                                                                                                                                                                                                                                                                                                                                                                                                                                                                                                                                                                                                                                                                                                  |
| Manuscript ID                 | bmjopen-2019-034580                                                                                                                                                                                                                                                                                                                                                                                                                                                                                                                                                                                                                                                                                                                              |
| Article Type:                 | Original research                                                                                                                                                                                                                                                                                                                                                                                                                                                                                                                                                                                                                                                                                                                                |
| Date Submitted by the Author: | 26-Sep-2019                                                                                                                                                                                                                                                                                                                                                                                                                                                                                                                                                                                                                                                                                                                                      |
| Complete List of Authors:     | Buckley, Benjamin; Liverpool John Moores University, Physical Activity Exchange<br>Thijssen, Dick; Liverpool John Moores University<br>Murphy, Rebecca; Liverpool John Moores University, Research Institute for Sport and Exercise Sciences<br>Graves, Lee; Liverpool John Moores University,<br>Cochrane, Madeleine; Liverpool John Moores University, Physical Activity Exchange<br>Gillison, Fiona; University of Bath, Department for Health<br>Crone, Diane; Cardiff Metropolitan University<br>Wilson, Philip; Brock University<br>Whyte, Gregory; Liverpool John Moores University, Research Institute for Sport and Exercise Sci<br>Watson, Paula; Liverpool John Moores University, Research Institute for Sport and Exercise Sciences |
| Keywords:                     | Cardiovascular Health, Self-Determination Theory, Exercise Referral, Behaviour Change, Translational Research                                                                                                                                                                                                                                                                                                                                                                                                                                                                                                                                                                                                                                    |
|                               |                                                                                                                                                                                                                                                                                                                                                                                                                                                                                                                                                                                                                                                                                                                                                  |

SCHOLARONE™  
Manuscripts

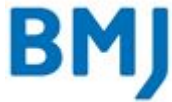

I, the Submitting Author has the right to grant and does grant on behalf of all authors of the Work (as defined in the below author licence), an exclusive licence and/or a non-exclusive licence for contributions from authors who are: i) UK Crown employees; ii) where BMJ has agreed a CC-BY licence shall apply, and/or iii) in accordance with the terms applicable for US Federal Government officers or employees acting as part of their official duties; on a worldwide, perpetual, irrevocable, royalty-free basis to BMJ Publishing Group Ltd ("BMJ") its licensees and where the relevant Journal is co-owned by BMJ to the co-owners of the Journal, to publish the Work in this journal and any other BMJ products and to exploit all rights, as set out in our [licence](#).

The Submitting Author accepts and understands that any supply made under these terms is made by BMJ to the Submitting Author unless you are acting as an employee on behalf of your employer or a postgraduate student of an affiliated institution which is paying any applicable article publishing charge ("APC") for Open Access articles. Where the Submitting Author wishes to make the Work available on an Open Access basis (and intends to pay the relevant APC), the terms of reuse of such Open Access shall be governed by a Creative Commons licence – details of these licences and which [Creative Commons](#) licence will apply to this Work are set out in our licence referred to above.

Other than as permitted in any relevant BMJ Author's Self Archiving Policies, I confirm this Work has not been accepted for publication elsewhere, is not being considered for publication elsewhere and does not duplicate material already published. I confirm all authors consent to publication of this Work and authorise the granting of this licence.

1  
2  
3 **Pragmatic evaluation of a co-produced physical activity referral scheme: A quasi-experimental**  
4  
5  
6 **study**  
7  
8  
9

10 Benjamin J. R. Buckley<sup>a</sup>, Dick H. J. Thijssen<sup>a,e</sup>, Rebecca C. Murphy<sup>a</sup>, Lee E. F. Graves<sup>a</sup>,  
11 Madeleine Cochrane<sup>a</sup>, Fiona Gillison<sup>b</sup>, Diane Crone<sup>c</sup>, Philip M. Wilson<sup>d</sup>, Greg Whyte<sup>a</sup> and  
12 Paula M. Watson<sup>a</sup>  
13  
14

15  
16  
17 <sup>a</sup> Research Institute for Sport and Exercise Sciences, Liverpool John Moores University,  
18 Liverpool, UK  
19

20 <sup>b</sup> Department for Health, University of Bath, Bath, UK  
21

22 <sup>c</sup> Cardiff School of Sport and Health Sciences, Cardiff Metropolitan University, UK  
23

24 <sup>d</sup> Behavioural Health Sciences Research Lab, Department of Kinesiology, Brock University,  
25 Ontario, Canada  
26

27 <sup>e</sup> Radboud Institute for Health Sciences, Department of Physiology, Radboud University  
28 Medical Center, Nijmegen, Netherlands  
29  
30  
31  
32  
33  
34  
35  
36  
37  
38  
39  
40  
41  
42  
43  
44  
45  
46  
47  
48  
49  
50  
51  
52  
53  
54  
55  
56  
57  
58  
59  
60

1  
2  
3  
4  
5  
6  
7  
8  
9  
10  
11  
12  
13  
14  
15  
16 **Objectives.** UK exercise referral schemes (ERSs) have been criticised for focussing too much on  
17 exercise prescription and not enough on sustainable physical activity (PA) behaviour change.  
18 Previously, a theoretically-grounded intervention (Co-PARS) was co-produced to support long-term  
19 PA behaviour change in individuals with health conditions. The purpose of this study was to investigate  
20 the effectiveness of Co-PARS compared to a usual care ERS and no treatment for increasing  
21 cardiorespiratory fitness.  
22  
23  
24  
25

26 **Design.** A three-arm quasi-experimental trial.

27 **Setting.** Two leisure centres providing a) Co-PARS, b) usual exercise referral care, and one no-treatment  
28 control.  
29

30 **Participants.** 100 adults with lifestyle-related health conditions (e.g. cardiovascular, diabetes,  
31 depression) were recruited to Co-PARS, usual care, or no treatment.  
32

33 **Intervention.** 16-weeks of physical activity behaviour change support delivered at 4, 8, 12, and 18  
34 weeks, in addition to the usual care 12-week leisure centre access.  
35

36 **Outcome measures.** Cardiorespiratory fitness, vascular health, PA, mental wellbeing were collected  
37 at baseline, 12 weeks, and 6 months (PA and mental wellbeing only). Fitness centre engagement (Co-  
38 PARS and usual care) and behaviour change consultation attendance (Co-PARS) were also collected.  
39 Following an intention-to-treat approach, repeated-measures linear mixed models were used to  
40 explore intervention effects.  
41  
42  
43  
44  
45

46 **Results.** Significant improvements in cardiorespiratory fitness and vascular health were found in Co-  
47 PARS compared to usual care and no-treatment at 12 weeks. No significant effects were noted in PA  
48 or wellbeing at 12 weeks or 6 months. Intervention engagement was higher in Co-PARS than usual  
49 care, though this was not significant.  
50

51 **Conclusion.** A co-produced intervention was effective at improving cardiorespiratory and vascular  
52 health at 12 weeks compared to usual care and no treatment, despite no effect for PA levels at 12  
53 weeks or 6 months. Such an iterative approach provides methodological insight into how we can co-  
54 produce interventions while retaining evidence-based components.  
55  
56  
57  
58  
59  
60

**Trial registration:** ClinicalTrials.gov: NCT03490747

**Keywords:** Cardiovascular Health; Self-Determination Theory; Exercise Referral; Behaviour Change Intervention; Translational Research.

### **Strengths and limitations of the study**

- This study advances the literature on exercise referral effectiveness by pragmatically evaluating a co-produced physical activity referral intervention, which was underpinned by multiple stakeholders and behaviour change theory.
- The study documents the third phase of a novel and iterative approach which co-produced, piloted, and then evaluated (this study) a physical activity referral intervention that was deemed feasible to implement in practice.
- Objective and subjective measures provide insight into the potential effects for patient health.
- It is not possible to directly attribute intervention effects to the phased co-production approach, although supported by the Medical Research Council.
- A larger sample size is needed to substantiate findings.

### **Funding**

The 6-month data collection and analysis was supported by a financial grant from NHS Liverpool Clinical Commissioning Group.

### **Competing interests**

The authors declare that they have no competing interests.

### **Authors' contributions**

BB collected, analysed, and interpreted the participant data. BB and MC collected the 6-month patient outcome data. BB and PW drafted the manuscript. All authors read, contributed to, and approved the final manuscript.

### **Availability of data and materials**

The datasets used and/or analysed during the current study are available from the corresponding author on reasonable request.

### **Word count**

~3000

### **Ethics approval and consent to participate**

Full written consent was obtained from participants and the study was approved by NHS Research Ethics Committee (REC: 18/NW/0039 - Project: 238547).

### **Acknowledgements**

We would like to thank the participants in this study for their time, the delivery staff and centre managers for their ongoing support, and the initial development group involved in the co-production process.

### **INTRODUCTION**

Physical inactivity is the fourth leading cause of death worldwide and costs the UK an estimated £7.4 billion annually, including £0.9 billion to the NHS alone[1]. Exercise referral schemes (ERSs) provide a promising framework to facilitate physical activity (PA) behaviour change in at-risk populations. Typically, UK ERSs consist of a referral from a healthcare professional to a 12-16-week tailored exercise programme provided by a qualified practitioner.

There is inconsistent evidence as to the effectiveness of ERSs on PA behaviour, mental well-being, quality of life, and physical health outcomes [2–4]. More recently, however, promising effects of ERSs have been demonstrated in Wales [5], Sweden [6], and Spain [7]. In addition, a systematic review identified promising effects of UK ERSs on self-reported PA and cardiovascular health markers, whilst observing that longer-term interventions were more likely to be effective [8]. In agreement with Rowley's conclusion, Prior and colleagues [9] demonstrated that for every 8 participants referred to a 24-week ERS, 1 participant showed an improvement in at least one health indicator at 12-months follow up.

Despite recent promise for the effectiveness of ERSs [7–10], substantial heterogeneity exists in both design and delivery [11,12], reflecting varying assumptions on how best to promote health behaviour change [13,14]. This limits potential scalability of 'successful' ERSs. Traditionally, ERSs have focussed on short-term exercise prescription without appropriate evidence of effectiveness or underpinning of behaviour change theory [15]. A recent attempt to integrate behaviour change theory into an ERS [16] however, showed no advantage over a standard ERS at 12 weeks or 6 months. The authors noted

1  
2  
3 considerable implementation challenges when training staff, such as work-related demands that may  
4 have reduced the importance of the theory-based training. It is plausible that delivery staff asked to  
5 implement interventions designed by academics may lack ownership and feel less  
6 motivated/competent. One potential way to promote ownership and engagement might be to adopt  
7 a co-production approach, as a means of co-creating value across the public sector [17–19]. Though  
8 not a panacea, the involvement of practitioners, managers and service-users in co-production has  
9 potential to improve intervention relevance, fidelity, and effectiveness [20].

10  
11  
12 Previously, a theoretically-grounded PA referral scheme (Co-PARS) was co-produced by academics,  
13 policy-makers, practitioners, and service-users [21], with a focus on supporting sustainable PA  
14 behaviour change. A pilot of Co-PARS [22,23] showed clinically meaningful improvements in  
15 cardiometabolic health and PA, although several challenges were noted that required further  
16 development. Moreover, as there was no usual care control, it was unknown whether these effects  
17 were due to the fact participants were taking part in an ERS or due to the unique elements of Co-PARS.  
18 Thus, the aims of this study were to investigate the effectiveness of Co-PARS compared to a usual care  
19 ERS and a no-treatment control on change in cardiorespiratory fitness (CRF) at 12 weeks and PA and  
20 wellbeing at 6 months.

## 21 22 23 24 25 26 27 28 29 30 31 32 33 34 35 36 37 38 39 40 **METHODS**

### 41 42 43 **Study Design**

44  
45 A three-arm quasi-experimental trial involving: 1. Co-PARS (delivered at fitness centre A); 2. usual care  
46 ERS (delivered at fitness centre B); and 3. no-treatment control. Outcome measures (CRF, vascular  
47 health, PA, mental wellbeing) were collected at baseline, 12 weeks, and 6 months (PA and mental  
48 wellbeing only). Full written consent was obtained from participants and the study was approved by  
49 NHS Research Ethics Committee (REC: 18/NW/0039 - Project: 238547) and registered on  
50 ClinicalTrials.gov (NCT03490747).

### 51 52 53 54 55 56 57 58 59 60 **Patient and Public Involvement**



1  
2  
3 The intervention was previously co-produced, piloted, and adapted with substantial service user input  
4  
5 [21,22].  
6  
7

## 8 **Participants and Recruitment**

### 9

10 Participants were eligible if aged  $\geq 18$  years with a health-related risk factor (e.g. hypertension,  
11 hyperglycaemia, obesity) and/or health condition (e.g. diabetes, cardiovascular disease, depression)  
12 that may be alleviated by increasing PA levels. Participants with uncontrolled health conditions, severe  
13 psychological or neurological conditions were excluded. Eligible participants were referred to either  
14 fitness centre A (Co-PARS) or fitness centre B (usual care) by a healthcare professional. Reception staff  
15 at both centres provided study information and gained consent to pass participant details to the  
16 researcher. Interested participants were sent an information sheet and baseline data collection was  
17 arranged. Participants in the no-treatment control were recruited via posters, electronic invitations,  
18 and email communications.  
19  
20  
21  
22  
23  
24  
25  
26  
27  
28  
29

## 30 **Study Arms (figure 1)**

### 31

32  
33  
34 **Usual care exercise referral scheme (ERS – centre B).** Usual care followed a standard ERS model of 12-  
35 week subsidised access to a fitness centre (swimming, gym, group classes). Participants met an  
36 exercise referral practitioner for an initial, 1-hour induction (week 1) during which a 12-week exercise  
37 programme was provided for the participant. Any further contact with a practitioner was informal and  
38 opportunistic. This system was already in place and was considered usual care for the local area.  
39 Centre B was chosen as a comparison centre due to its similarity in referral numbers and socio-  
40 economic make-up of the local population to centre A (where Co-PARS was being delivered).  
41  
42  
43  
44  
45  
46  
47  
48  
49

## 50 **Co-produced PA referral scheme (Co-PARS – centre A)**

### 51

52  
53 Participants received the same 12-week subsidised access to a fitness centre as usual care plus a series  
54 of one-to-one behaviour change consultations (60-minute induction followed by 30-minute  
55 consultations at weeks 4, 8, 12 and 18). A log book was provided for each participant to set action  
56 plans, log progress and facilitate consultation discussions. Consultations were delivered by exercise  
57  
58  
59  
60

referral practitioners in an autonomy supportive counselling style, drawing on the principles of Self-Determination Theory [24]. This additional support aimed to encourage habitual opportunities to increase PA as well as activities available at the fitness centre. An overview of the theoretical underpinning and intervention components is available elsewhere [21].

**No-treatment control (NTC).** Participants received a lifestyle advice booklet only (offered to all study arms at baseline data collection), based on national guidance for PA, nutrition, smoking cessation and alcohol consumption.

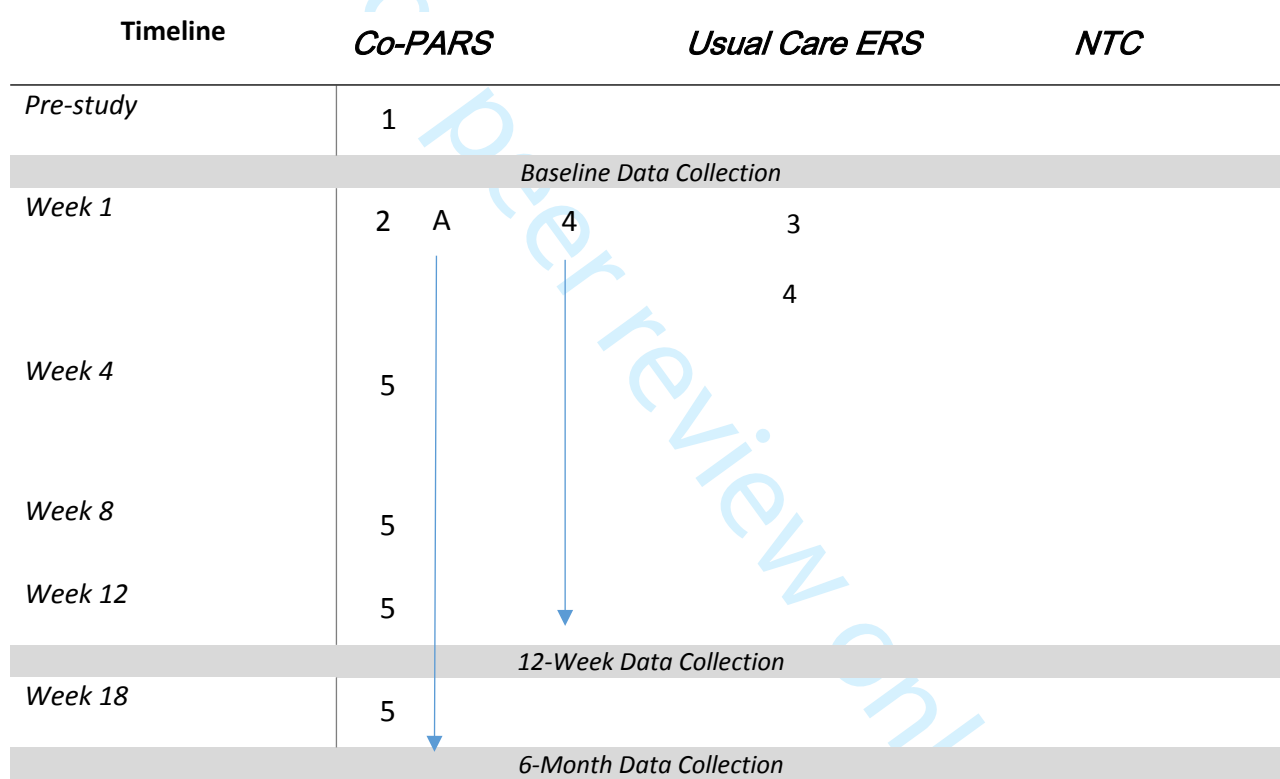

|   |                                                                                                                                                                                                                                                                                                                                                                |
|---|----------------------------------------------------------------------------------------------------------------------------------------------------------------------------------------------------------------------------------------------------------------------------------------------------------------------------------------------------------------|
| 1 | <p>Training delivered to Exercise Referral Practitioners in PA behaviour change by a trained HCPC-registered Psychologist [last author].</p> <p>Training included: 1. Needs analysis (observation of current practices); 2. Education (Full day workshop); 3. Behaviour change support (one-to-one sessions over 4 weeks); 5. Ongoing support as required.</p> |
| 2 | <p>1-hour induction underpinned by Self-Determination Theory [24] to foster participant autonomy, competence, and relatedness. The focus was on getting to know the participant, discussing participant goals and agreeing a programme of activities tailored to their needs. Participant self-report PA logbook was provided.</p>                             |

|                                                                                                                                                                                                                                                                                                                                                |                                                                                                                                                                                                                                                                                                                                                                                      |
|------------------------------------------------------------------------------------------------------------------------------------------------------------------------------------------------------------------------------------------------------------------------------------------------------------------------------------------------|--------------------------------------------------------------------------------------------------------------------------------------------------------------------------------------------------------------------------------------------------------------------------------------------------------------------------------------------------------------------------------------|
| 3                                                                                                                                                                                                                                                                                                                                              | Usual care exercise referral induction focussed on prescribing an individualised 12-week exercise programme appropriate for the specific health condition.                                                                                                                                                                                                                           |
| <b>Baseline and 12-week measures</b> – <i>Cardiorespiratory Fitness (CRF), Warwick Edinburgh Mental Wellbeing Scale (WEMWBS), International Physical Activity Questionnaire (IPAQ), Accelerometer Derived PA, Body Mass Index (BMI), Waist-To-Height Ratio, Blood Pressure, Flow-Mediated Dilation (FMD), Carotid Artery Reactivity (CAR),</i> |                                                                                                                                                                                                                                                                                                                                                                                      |
| <b>6-month measures</b> – <i>WEMWBS, IPAQ, and accelerometer derived PA.</i>                                                                                                                                                                                                                                                                   |                                                                                                                                                                                                                                                                                                                                                                                      |
| A                                                                                                                                                                                                                                                                                                                                              | Participant self-report PA logbook. An A5 booklet in which participants could write down their action plans and record the PA they engaged in (for 18 weeks). There was space for participants to record how they were feeling and any challenges they were facing. The logbook also provided information about PA benefits, guidelines and testimonials from previous participants. |
| Numbers (1-5) represent intervention activities. Letters (A) represent an intervention tool.                                                                                                                                                                                                                                                   |                                                                                                                                                                                                                                                                                                                                                                                      |

**Figure 1.** 'PaT Plot' describing intervention arm components.[25]

### Outcome measures

*Cardio-respiratory fitness (CRF).* Maximal oxygen consumption ( $VO_2\max^2$ ) was estimated via the sub-maximal Astrand-Rhyming cycle ergometer protocol [26]. The protocol is a single-stage cycling test designed to elicit a steady-state heart rate over a period of ~6 minutes.

*Accelerometer-derived PA.* Tri-axial ActiGraph GT3x accelerometers (ActiGraph, Pensacola, FL, USA) measured PA for 7 days, which have been validated in a comparable population [27]. Raw triaxial acceleration values were converted into an omnidirectional measure of acceleration, referred to as Euclidian norm minus one [28]. Minimum wear time was 10 hours per day and 3 days per week including one weekend day [29]. The R package GGIR [28] facilitated extraction of user-defined acceleration thresholds: 5.9 to 69.1 mg for light-intensity PA [30], 69.1 to 258.7 mg as moderate and >258.7 mg as vigorous-intensity PA [31].

*Vascular health.* Brachial artery flow-mediated dilation (FMD) and carotid artery reactivity (CAR) were measured using ultrasound techniques [23]. Both techniques measure vascular endothelial function and have been demonstrated to independently predict future risk of cardiovascular events in humans

[32,33]. Blood pressure was measured in the supine position using an automated blood pressure device (Omron Healthcare UK Limited, Milton Keynes, UK).

*Anthropometric measures.* Body mass index (BMI) was calculated as mass divided by stature ( $\text{kg}/\text{m}^2$ ).

Waist-to-height ratio was calculated as waist circumference divided by stature.

*Mental wellbeing.* Mental wellbeing was measured via the 14-item Warwick-Edinburgh Mental Well-being Scale (WEMWBS; [34], which asks participants to rate their psychological wellbeing (e.g. “I’ve been feeling cheerful”) over the previous 2 weeks (measured on a likert scale of 1 (none of the time) to 5 (all of the time)).

*Fitness centre engagement (Co-PARS and usual care only).* The number of occasions participants attended the fitness centre between baseline and 12 weeks (weekly attendance) and 12 weeks to 6 months (monthly attendance) was obtained from computerised attendance records. Based on a recommended attendance of twice weekly, a formula was used to calculate a percentage for “12-week engagement”, which took into account both frequency and consistency of attendance:

$$\left( \frac{(n1*0.5) + (n2) + (n3*1.2)}{12} \right) \times 100$$

n1 = number of weeks in which participant attends once only  
 n2 = number of weeks in which participant attends twice  
 n3 = number of weeks in which participant attends three or more times

*Behaviour change consultation attendance (Co-PARS only).* The number of consultations offered and attended were collected by exercise referral practitioners at induction, 4,8,12 and 18 weeks.

### Sample size

Sample size was determined to detect a meaningful difference in CRF at 12 weeks based on our pilot results [22]. To detect a difference of  $2 \text{ ml}\cdot\text{kg}^{-1}\cdot\text{min}^{-1}$  between Co-PARS and usual care, 42 participants

1  
2  
3 were required per arm ( $f=0.25$ ,  $p=0.05$ , power = 0.8). To detect a difference of  $3.2 \text{ ml.kg}^{-1}\text{min}^{-1}$   
4  
5 between the intervention arms and the no-treatment control, 17 participants were required for the  
6  
7 no-treatment control ( $f=0.5$ ,  $p=0.05$ , power = 0.8). Thus, a total sample of 101 participants were  
8  
9 required.  
10

### 11 12 13 **Statistical analyses**

14  
15  
16 An intention-to-treat approach was undertaken assuming no change in non-respondents (last  
17  
18 observation carried forward) to produce a conservative estimate of intervention effects. Change in  
19  
20 outcomes were examined using repeated-measures linear mixed models with fixed effects for study  
21  
22 arm (Co-PARS, usual care ERS, no-treatment control) and time (baseline-to-week-12 change, week-  
23  
24 12-to-6-month change, and baseline-to-6-month change) with participants included as random  
25  
26 effects. Baseline values were used as covariates. For non-normally distributed data, median and  
27  
28 interquartile range is presented.  
29  
30

### 31 32 **RESULTS**

33  
34  
35  
36 *Participants.* 68 participants provided baseline data, 56 of whom provided 12-week data, and 58 of  
37  
38 whom provided 6-month data (figure 2).  
39  
40  
41  
42  
43  
44  
45  
46  
47  
48  
49  
50  
51  
52  
53  
54  
55  
56  
57  
58  
59  
60

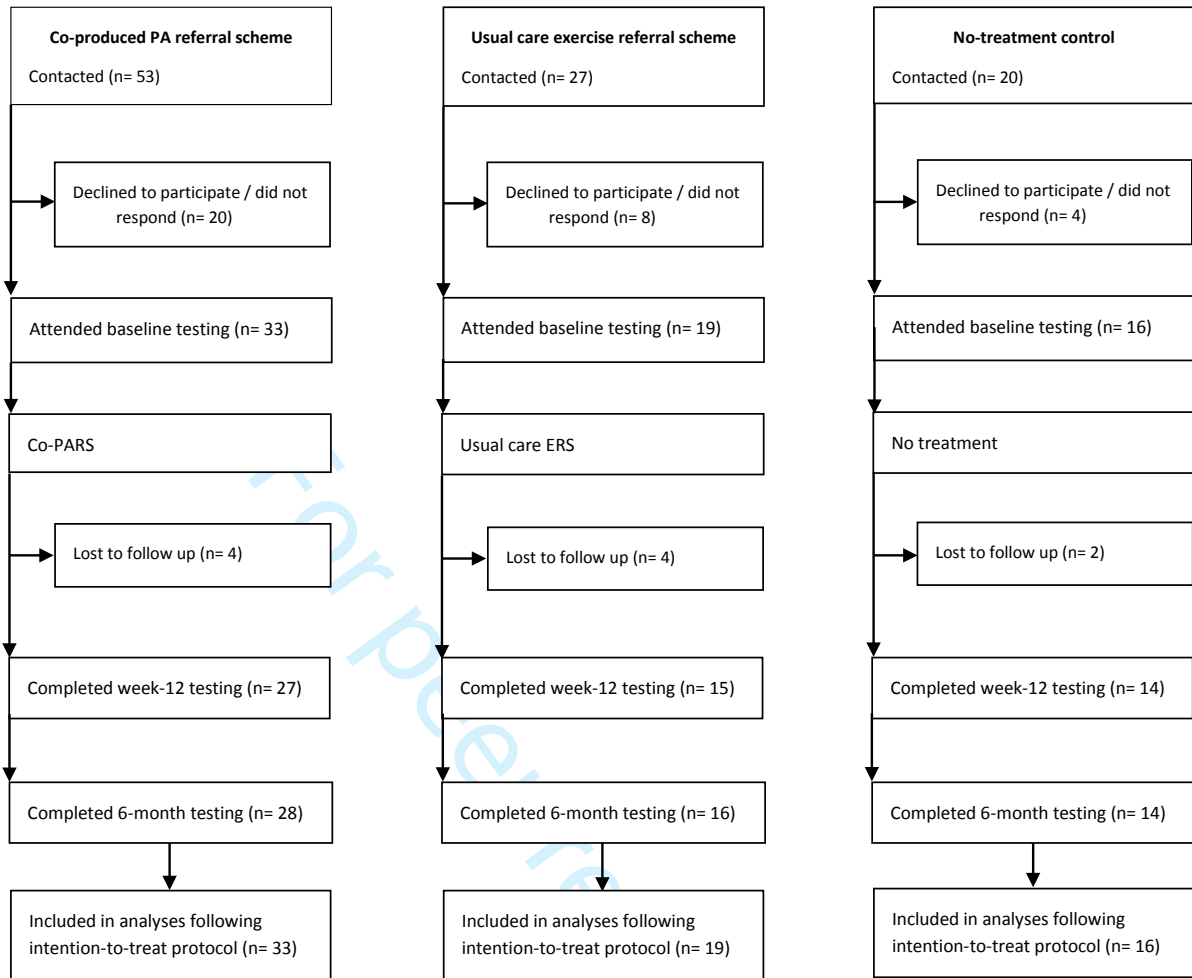

**Figure 2.** Participant flow diagram within the three study arms.

**Table 1.** Baseline characteristics presented as Mean  $\pm$  SD or % (n) of group.

|  | Co-produced PA | Usual care | No-treatment | Between |
|--|----------------|------------|--------------|---------|
|--|----------------|------------|--------------|---------|

|                                                    | referral<br>(n=33) | ERS<br>(n=19) | control<br>(n=16) | arm<br><i>p</i> -value |
|----------------------------------------------------|--------------------|---------------|-------------------|------------------------|
| Age (years)                                        | 57 ± 12            | 53 ± 16       | 48 ± 15           | <i>p</i> =0.319        |
| Female (% of sample)                               | 58 (19)            | 47 (9)        | 56 (9)            | <i>p</i> =0.774        |
| White British (% of sample)                        | 82 (27)            | 95 (18)       | 75 (12)           | <i>p</i> =0.132        |
| Full-time employment (% of sample)                 | 18 (6)             | 26 (5)        | 62 (10)           | <i>p</i> =0.001        |
| Never smoked (% of sample)                         | 73 (24)            | 37 (7)        | 81 (13)           | <i>p</i> =0.002        |
| Body mass index (kg/m <sup>2</sup> )               | 31 ± 7             | 33 ± 6        | 29 ± 6            | <i>p</i> =0.226        |
| Systolic blood pressure (mmHg)                     | 131 ± 11           | 138 ± 18      | 123 ± 12          | <i>p</i> =0.010        |
| Primary referral reason / health concern (control) |                    |               |                   | <i>p</i> =0.132        |
| Cardiometabolic (% of sample)                      | 67 (22)            | 43 (8)        | 62 (10)           | -                      |
| Cancer (% of sample)                               | 6 (2)              | 5 (1)         | 6 (1)             | -                      |
| Mental Health (% of sample)                        | 18 (6)             | 26 (5)        | 19 (3)            | -                      |
| Musculoskeletal (% of sample)                      | 9 (3)              | 26 (5)        | 13 (2)            | -                      |
| Comorbidity (% of sample)                          | 85 (28)            | 100 (19)      | 81 (13)           | <i>p</i> =0.166        |

*P*-values represent between arm baseline effects. There was no between arm effect for referral reason, thus no between arm *p*-values are provided for referral reason sub groups.

**Baseline characteristics (table 1).** No significant differences were noted between arms for age, sex, ethnicity, BMI, referral reason, or accelerometer-derived PA levels ( $p>0.05$ ). Full-time employment status ( $p=0.001$ ) and CRF ( $p=0.015$ ) were significantly higher in the control compared to usual care and Co-PARS. Smoking status was significantly higher in usual care compared to Co-PARS and control ( $p=0.010$ ). Mental wellbeing was significantly lower in Co-PARS compared to control ( $p=0.023$ ).

### Baseline-to-12-Week effects

1  
2  
3 Raw outcome values are presented for baseline, week 12, and 6 months in Table 2. There was a  
4 significant effect for study arm in baseline-to-12-week change in CRF ( $p=0.002$ ). Post-hoc testing  
5 revealed a significantly higher CRF change in Co-PARS (2.4) compared to the ERS (0.3;  $p=0.021$ ) and  
6 control (-0.6;  $p=0.001$ ), but no difference between the ERS and control ( $p=0.314$ ). A significant effect  
7 for study arm was found in change in FMD% ( $p=0.002$ ), with FMD% change significantly higher in Co-  
8 PARS (2.4) compared to control (-1.1;  $p=0.001$ ) but not the ERS (0.8;  $p=0.099$ ). The change in FMD%  
9 was not significantly different between the ERS and control ( $p=0.71$ ). No statistically significant study  
10 arm effects were noted for changes in CAR%, blood pressure, resting heart rate, anthropometric  
11 measures, PA or WEMWBS at 12 weeks ( $p>0.05$ ).  
12  
13  
14  
15  
16  
17  
18  
19  
20  
21  
22  
23

#### 24 **Baseline-to-6-month effects**

25  
26 No statistically significant study arm effects were noted for change in WEMWBS or PA at 6 months  
27 ( $p>0.05$ ).  
28  
29  
30  
31

#### 32 **Fitness centre engagement (Co-PARS and usual care ERS) and consultation attendance (Co-PARS** 33 **only).**

34  
35  
36  
37 Table 3 reports the participant fitness centre engagement data for the Co-PARS and usual care ERS.  
38 Although not statistically significant, Co-PARS engagement was 9% higher, participants attended the  
39 fitness centre on average 3 times more per month, and 23% more participants were attending the  
40 fitness centre beyond 6-months follow up compared to usual care. Co-PARS behaviour change  
41 consultation attendance is reported in Table 4.  
42  
43  
44  
45  
46  
47  
48  
49  
50  
51  
52  
53  
54  
55  
56  
57  
58  
59  
60



Table 2. Cardiometabolic health outcomes and PA levels at baseline, 12 weeks, 6 months, and between arm baseline-to 12-week or 6-month effect.

|                                                | Co-PARS   |           |         | Usual Care ERS |           |         | No-Treatment Control |           |         | Between arm effect p-value <sup>(a)</sup> |
|------------------------------------------------|-----------|-----------|---------|----------------|-----------|---------|----------------------|-----------|---------|-------------------------------------------|
|                                                | Baseline  | Week 12   | 6 Month | Baseline       | Week 12   | 6 Month | Baseline             | Week 12   | 6 Month |                                           |
| <b>Fitness (n=56)</b>                          |           |           |         |                |           |         |                      |           |         |                                           |
| CRF <i>ml.kg.<sup>-1</sup>min<sup>-1</sup></i> | 22.2±7    | 24.6±7    | -       | 23.3±6.6       | 23.6±7    | -       | 29.6±9.2             | 28.9±8.7  | -       | p=0.002                                   |
| <b>Physical Activity</b>                       |           |           |         |                |           |         |                      |           |         |                                           |
| <b>GT3x (n= 61) Mins.day</b>                   |           |           |         |                |           |         |                      |           |         |                                           |
| Light intensity                                | 90±52     | 98±64     | 107±75  | 98±36          | 93±31     | 158±145 | 90±37                | 101±33    | 86±40   | p=0.332                                   |
| Moderate intensity                             | 44±32     | 42±29     | 42±33   | 43±28          | 43±30     | 55±55   | 60±31                | 65±24     | 54±21   | p=0.260                                   |
| Vigorous intensity                             | 1±3       | 1±2       | 1±2     | 1±2            | 1±1       | 1±2     | 2±4                  | 2±3       | 3±8     | p=0.108                                   |
| <b>Vascular Ultrasound (n=64)</b>              |           |           |         |                |           |         |                      |           |         |                                           |
| CAR%                                           | 1.7±2.7   | 2.8±2.2   | -       | 2.7±1.8        | 3.9±2.8   | -       | 2.5±2.7              | 1.7±2.7   | -       | p=0.073                                   |
| CAR Baseline <i>cm</i>                         | 0.69±0.07 | 0.69±0.06 | -       | 0.69±0.08      | 0.7±0.09  | -       | 0.65±0.07            | 0.64±0.06 | -       | p=0.130                                   |
| FMD%                                           | 4.4±2.3   | 6.8±2.7   | -       | 4.2±2          | 5±2.1     | -       | 6.2±2.1              | 5.2±2.8   | -       | p=0.002                                   |
| FMD Baseline <i>cm</i>                         | 0.39±0.07 | 0.38±0.06 | -       | 0.39±0.09      | 0.41 0.08 | -       | 0.38±0.08            | 0.37±0.06 | -       | p=0.728                                   |
| <b>Cardiometabolic (n=68)</b>                  |           |           |         |                |           |         |                      |           |         |                                           |
| BMI <i>kg.m2</i>                               | 31±7      | 30±7      | -       | 33±6           | 32±6      | -       | 29±6                 | 29±6      | -       | p=0.323                                   |
| WHR                                            | 62±9      | 61±10     | -       | 64±8           | 63±8      | -       | 56±9                 | 56±9      | -       | p=0.261                                   |
| SBP <i>mmHg</i>                                | 131±11    | 127±12    | -       | 138±18         | 132±15    | -       | 123±12               | 118±13    | -       | p=0.937                                   |
| DBP <i>mmHg</i>                                | 73±7      | 71±8      | -       | 73±9           | 71±11     | -       | 72±11                | 68±10     | -       | p=0.584                                   |
| RHR <i>bpm</i>                                 | 70±10     | 65±10     | -       | 70±12          | 68±11     | -       | 66±12                | 63±9      | -       | p=0.540                                   |
| <b>Mental Wellbeing (n=68)</b>                 |           |           |         |                |           |         |                      |           |         |                                           |
| WEMWBS                                         | 46±9      | 51±10     | 48±10   | 49±10          | 52±11     | 50±13   | 53±9                 | 56±9      | 53±10   | p=0.796                                   |

Co-PARS, Co-produced PA referral scheme; ERS, Exercise referral scheme; CRF, Cardiorespiratory Fitness; GT3x, Accelerometer; IPAQ, International Physical Activity Questionnaire; CAR, Carotid artery reactivity; FMD, Flow-mediated dilation; BMI, Body Mass Index; WHR, Waist-to-Height ratio; SBP, Systolic blood pressure; DBP, Diastolic blood pressure; RHR, Resting heart rate, WEMWBS, Warwick-Edinburgh Mental Wellbeing Scale  
<sup>a</sup> F-statistic for between arm baseline-to-6-month change or baseline-to-week 12 change if variable not collected at 6 months.

<sup>b</sup> Data presented as median and interquartile range (IQR) due to non-normal distribution (skewness and/or kurtosis).  
Missing data was due to inability to complete the CRF test (n=12), inability to complete the vascular ultrasound protocols (n=4), and insufficient accelerometer wear time or non-return (n=7).

**Table 3.** Fitness centre engagement presented as Mean  $\pm$ SD or % (n) sample.

|                                                                                         | Co-PARS<br>(n=33) | Usual Care<br>(n=19) | Between centre difference |
|-----------------------------------------------------------------------------------------|-------------------|----------------------|---------------------------|
| Engagement %                                                                            | 42 $\pm$ 29       | 33 $\pm$ 27          | <i>p</i> =0.267           |
| Number of fitness centre visits (per person per month) week 12 to 6 months <sup>b</sup> | 3 $\pm$ 14        | 0 $\pm$ 1            | <i>p</i> =0.072           |
| % still attending fitness centre beyond 6 months                                        | 39 (13)           | 16 (3)               | <i>p</i> =0.101           |

<sup>b</sup>Data presented as median  $\pm$ IQR due to non-normal distribution (skewness and/or kurtosis).

**Engagement**: based on a recommended attendance of twice weekly, a formula was used to calculate a percentage for "12-week engagement", which took into account both frequency and consistency of attendance (see methods).

**Table 4.** Co-PARS behaviour change consultation attendance *n* (%) out of an initial 33 participants.

| Consultation | <i>n</i> Booked | <i>n</i> Attended |
|--------------|-----------------|-------------------|
| Induction    | 30 (91)         | 28 (93)           |
| Week 4       | 27 (82)         | 21 (78)           |
| Week 8       | 22 (67)         | 20 (91)           |
| Week 12      | 21 (64)         | 17 (81)           |
| Week 18      | 18 (55)         | 9 (50)            |

## DISCUSSION

This is the first study to investigate the effectiveness of a theoretically-grounded, co-produced PA referral scheme (Co-PARS) compared to a usual care ERS and no treatment. Despite challenges in recruitment that meant the study was underpowered, the findings demonstrated significant and clinically meaningful improvements in CRF and vascular health in Co-PARS compared to the usual care and no treatment. No significant effects were noted for accelerometer-derived PA levels or mental wellbeing at 12-weeks or 6-months.

To our knowledge, the effect of usual care ERSs compared to theoretically-grounded interventions on CRF has not been previously explored. We observed a significant increase in CRF in Co-PARS compared to usual care and a no-treatment control. According to values reported by [35] both Co-PARS ( $22 \text{ ml.kg}^{-1}\text{min}^{-1}$ ) and usual care ( $23 \text{ ml.kg}^{-1}\text{min}^{-1}$ ) participants were below the lower limit of normal ( $28 \text{ ml.kg}^{-1}\text{min}^{-1}$ ) for baseline CRF. As low CRF is associated with a substantially elevated risk of all-cause mortality [36], the magnitude of change demonstrated in Co-PARS ( $2.4 \text{ ml.kg}^{-1}\text{min}^{-1}$ ) may be clinically meaningful. For example, in at-risk populations, relatively small magnitudes ( $\leq 1 \text{ ml.kg}^{-1}\text{min}^{-1}$ ) have been shown to significantly reduce clustered cardiometabolic risk [37]. Thus, Co-PARS was effective at improving CRF in individuals with low CRF by a clinically meaningful amount.

Promising improvements in vascular health were also noted in the Co-PARS group, with brachial artery FMD significantly improved compared to usual care and control arms. Although CAR was not statistically different between arms, both Co-PARS and usual care demonstrated a potentially meaningful within-arm improvement compared to no treatment, which exhibited a deterioration in vascular health. Such improvements in vascular measures may have prognostic implications. For example, a 1% increase in FMD has been suggested to reduce the future risk of CVD events by 13% [32].

Despite low baseline CRF, a substantial percentage of Co-PARS (73%) and usual care (71%) participants were meeting the Department of Health [38] guidelines of 150 minutes of moderate-intensity PA per

1  
2  
3 week. We observed a similar finding in our pilot [22] and subsequently raised the question as to the  
4 use of PA guidelines to assess eligibility for ERSs (NICE, 2014), as it appears from our data that  
5 individuals who are classed as “physically active” can still be very unfit and can benefit from ERSs in  
6 terms of fitness and cardiometabolic health. A further discrepancy was noted in the lack of change in  
7 PA levels in Co-PARS, despite improved CRF. It is possible measurement issues contributed to this  
8 discrepancy. Accelerometers can measure certain types of PA such as walking, running, and stair  
9 climbing [39]. They may not, however, sufficiently identify activities typical of an ERS delivered within  
10 a fitness centre environment (i.e. cycling, resistance training, circuits, swimming). Given Co-PARS had  
11 higher (albeit non-significant) fitness centre engagement compared to usual care, it is possible PA  
12 changes occurred that were not detected by the accelerometry data. Consideration therefore needs  
13 to be given to the appropriateness of accelerometers to measure PA in ERSs. Ultimately however, it is  
14 not clear why the increase in fitness occurred without a corresponding change in PA and further  
15 research is required to elucidate the relationship between PA and fitness.

16  
17  
18  
19  
20  
21  
22  
23  
24  
25  
26  
27  
28  
29  
30  
31  
32  
33 In addition to physiological health outcomes, we found baseline mental wellbeing to be below the  
34 national average (score of 50) in both Co-PARS (46) and usual care (49), but not the control (53) [40].  
35 Despite no significant between-group effect for mental wellbeing, within-group changes at 12 weeks  
36 were deemed clinically meaningful for Co-PARS (5) and usual care (3) but not in the no treatment  
37 control. It is notable that the post-intervention magnitude of change observed in mental wellbeing for  
38 Co-PARS (5) was larger than that observed in a meta-analysis encompassing >23,000 participants  
39 across 13 different ERSs (3), which were comparable in nature to the usual care ERS in this study [41].

40  
41  
42  
43  
44  
45  
46  
47  
48  
49  
50 From the 6-month data it appeared the scheme was not effective at promoting *sustained* PA behaviour  
51 change or mental wellbeing improvements. It must be noted, however, that the wellbeing levels were  
52 still higher than baseline and even small magnitudes of change (1-3) may be meaningful in clinical  
53 populations [42]. As discussed earlier, it may be that our PA measurement methods were unable to  
54 identify activities typical of a fitness centre environment. This notion is supported by the post-week-  
55  
56  
57  
58  
59  
60

1  
2  
3 12 attendance data, which highlighted Co-PARS participants were regularly attending the fitness  
4 centre whereas the usual care participants were not. The challenges of maintaining sustained health  
5 outcomes post-ERSs have been highlighted elsewhere [3] and it is notable that longer duration ERSs  
6 seem to be more effective [8].  
7  
8  
9

10  
11  
12  
13 Through a phased approach we have assessed the effectiveness of Co-PARS resulting from several  
14 years of co-production. Whilst the effects of co-production are difficult to isolate, a comparison of  
15 results at different stages of intervention refinement suggests the phased development approach had  
16 some positive effects. Unpublished engagement data from centre A in 2014-2015 (when the centre  
17 was running a usual care ERS) shows that engagement improved after the introduction of Co-PARS  
18 (42% vs 28% in 2014-2015), whereas engagement reduced in the usual care centre over the same  
19 period (32% vs 37% in 2014-2015). Furthermore, consultation attendance for Co-PARS in the current  
20 study was substantially higher than in our previous pilot (54% attended induction plus  $\geq 3$  behaviour  
21 change consultations, vs 9% in the pilot [22]), which may have been a reflection of refinements made  
22 to the intervention after the pilot (e.g. improved focus on holistic PA, improved monitoring  
23 procedures, improved continuity of instructors). These improvements in engagement highlight the  
24 importance of allowing time for complex interventions to develop [43], and are particularly promising  
25 given the effectiveness of ERSs are highly dependent on participant adherence [5,19]. Furthermore,  
26 this study has demonstrated how investing in the “bottom-up” development of an intervention can  
27 lead to an effective and sustainable model. We therefore support the arguments of Rutter and  
28 colleagues [44] in that a shift in thinking is needed, instead of asking whether an intervention works  
29 to fix a problem, researchers should aim to identify if and how it contributes to reshaping a system in  
30 a favourable way. As such, we propose the co-production and implementation process may be as  
31 important as the scheme content itself.  
32  
33  
34  
35  
36  
37  
38  
39  
40  
41  
42  
43  
44  
45  
46  
47  
48  
49  
50  
51  
52  
53  
54

## 55 **Strengths & Limitations**

56  
57  
58  
59  
60

1  
2  
3 There is a need for high-quality RCTs of theoretically informed approaches to PA behaviour change  
4 [3]. Due to pragmatic challenges, an RCT was not appropriate for the present study. Firstly, it was  
5 important participants could choose the most convenient fitness centre. Secondly, it was important  
6 we continued work with the same fitness centre and staff (following co-production [21] and pilot  
7 [22,23] phases) in order to develop the intervention to the point where it was deemed to have a  
8 worthwhile effect [43]. A pragmatic research approach was therefore deemed most appropriate to  
9 evaluate Co-PARS with high ecological validity. Pragmatic constraints did however mean the required  
10 sample size was not achieved, thus inferences of effectiveness need to be taken with caution. Finally,  
11 whilst this paper highlights many strengths of co-production, we do not wish to present co-production  
12 as a novel panacea [17] and it is important potential challenges and costs are considered prior to  
13 undertaking such an approach [20,45,46].  
14  
15  
16  
17  
18  
19  
20  
21  
22  
23  
24  
25  
26  
27  
28

## 29 **CONCLUSION**

30  
31  
32 A co-produced, theoretically-grounded PA referral scheme (Co-PARS) led to improved CRF and  
33 vascular health in at-risk individuals when compared to usual care and no treatment. In addition,  
34 clinically meaningful improvements in vascular health and mental wellbeing were observed at 12-  
35 weeks in both Co-PARS and usual care, but not the no treatment control group. Of note, PA remained  
36 unchanged at 12-weeks and 6-months follow-up. Adopting a phased approach has enabled multi-  
37 stakeholder input and ongoing intervention refinement, resulting in an intervention that showed  
38 promising effects on engagement and clinically meaningful improvements to participant health.  
39  
40  
41  
42  
43  
44  
45  
46  
47  
48  
49  
50  
51  
52  
53  
54  
55  
56  
57  
58  
59  
60

## References

- 1 Public Health England. Physical activity: applying All Our Health. 2019.
- 2 Dugdill L, Graham RC, McNair F. Exercise referral: the public health panacea for physical activity promotion? A critical perspective of exercise referral schemes; their development and evaluation. *Ergonomics* 2005 **48**:1390–410. doi:10.1080/00140130500101544
- 3 Pavey T, Taylor A, Fox K, *et al.* Effect of exercise referral schemes in primary care on physical activity and improving health outcomes: systematic review and meta-analysis. *BMJ* 2011;**343**:d6462. doi:10.1136/bmj.d6462
- 4 Pavey T, Anokye N, Taylor A, *et al.* The clinical effectiveness and cost-effectiveness of exercise referral schemes: a systematic review and economic evaluation. *Health Technology Assessment (Winchester, England)* 2011 **15**:i–xii, 1–254. doi:10.3310/hta15440
- 5 Murphy SM, Edwards RT, Williams N, *et al.* An evaluation of the effectiveness and cost effectiveness of the National Exercise Referral Scheme in Wales, UK: a randomised controlled trial of a public health policy initiative. *Journal of epidemiology and community health* 2012;**66**:745–53. doi:10.1136/jech-2011-200689
- 6 Onerup A, Arvidsson D, Blomqvist Å, *et al.* Physical activity on prescription in accordance with the Swedish model increases physical activity: a systematic review. *Br J Sports Med* 2018; doi:10.1136/bjsports-2018-099598
- 7 Martín-Borràs C, Giné-Garriga M, Puig-Ribera A, *et al.* A new model of exercise referral scheme in primary care: is the effect on adherence to physical activity sustainable in the long term? A 15-

1  
2  
3 month randomised controlled trial. *BMJ Open* 2018;**8**:e017211. doi:10.1136/bmjopen-2017-017211

4  
5  
6  
7  
8 8 Rowley N, Mann S, Steele J, *et al.* The effects of exercise referral schemes in the United Kingdom in  
9 those with cardiovascular, mental health, and musculoskeletal disorders: a preliminary systematic  
10 review. *BMC Public Health* 2018;**18**:949. doi:10.1186/s12889-018-5868-9  
11  
12  
13

14  
15  
16 9 Prior F, Coffey M, Robins A, *et al.* Long-Term Health Outcomes Associated With an Exercise  
17 Referral Scheme: An Observational Longitudinal Follow-Up Study. *Journal of Physical Activity and*  
18 *Health* 2019;1–6. doi:10.1123/jpah.2018-0442  
19  
20  
21  
22

23  
24  
25 10 Craike M, Wiesner G, Enticott J, *et al.* Equity of a government subsidised exercise referral scheme:  
26 A population study. *Social Science & Medicine* 2018; doi:10.1016/j.socscimed.2018.09.023  
27  
28  
29

30  
31  
32 11 Craig A, Dinan S, Smith A, *et al.* Exercise Referral Systems: A National Quality Assurance  
33 Framework. *Department of Health, London*: 2001.discovery.ucl.ac.uk  
34  
35  
36

37  
38  
39 12 Pavey T, Taylor A, Hillsdon M, *et al.* Levels and predictors of exercise referral scheme uptake and  
40 adherence: a systematic review. *J Epidemiol Commun H* 2012;**66**:737–44. doi:10.1136/jech-2011-  
41 200354  
42  
43  
44

45  
46  
47 13 Littlecott HJ, Moore GF, Moore L, *et al.* Psychosocial mediators of change in physical activity in  
48 the Welsh national exercise referral scheme: secondary analysis of a randomised controlled trial.  
49 *International Journal of Behavioral Nutrition and Physical Activity* 2014;**11**:1–11.  
50 doi:10.1186/s12966-014-0109-9  
51  
52  
53  
54

55  
56  
57 14 Hanson CL, Oliver EJ, Dodd-Reynolds CJ, *et al.* How do participant experiences and characteristics  
58  
59  
60



1  
2  
3 influence engagement in exercise referral? A qualitative longitudinal study of a scheme in  
4 Northumberland, UK. *BMJ Open* 2019;**9**:e024370. doi:10.1136/bmjopen-2018-024370  
5  
6  
7  
8  
9

10 15 Sowden S, Raine R. Running along parallel lines: how political reality impedes the evaluation of  
11 public health interventions. A case study of exercise referral schemes in England. *Journal of*  
12 *Epidemiology and Community Health* 2008;**62**:835–841. doi:10.1136/jech.2007.069781  
13  
14  
15  
16  
17

18 16 Duda JL, Williams GC, Ntoumanis N, *et al*. Effects of a standard provision versus an autonomy  
19 supportive exercise referral programme on physical activity, quality of life and well-being indicators:  
20 a cluster randomised controlled trial. *The international Journal of Behavioral Nutrition and Physical*  
21 *Activity* 2014;**11**:10. doi:10.1186/1479-5868-11-10  
22  
23  
24  
25  
26  
27

28 17 Ostrom E. Crossing the great divide: Coproduction, synergy, and development. *World*  
29 *Development* 1996;**24**:1073–87. doi:10.1016/0305-750x(96)00023-x  
30  
31  
32  
33  
34  
35

36 18 Clarke D, Jones F, Harris R, *et al*. What outcomes are associated with developing and  
37 implementing co-produced interventions in acute healthcare settings? A rapid evidence synthesis.  
38 *BMJ Open* 2017;**7**:e014650. doi:10.1136/bmjopen-2016-014650  
39  
40  
41  
42  
43  
44

45 19 Farrance C, Tsofliou F, Clark C. Adherence to community based group exercise interventions for  
46 older people: A mixed-methods systematic review. *Preventive Medicine* 2016;**87**:155–66.  
47  
48  
49  
50  
51  
52

53 20 Rycroft-Malone J, Burton CR, Bucknall T, *et al*. Collaboration and Co-Production of Knowledge in  
54 Healthcare: Opportunities and Challenges. *International Journal of Health Policy and Management*  
55  
56  
57  
58  
59  
60

1  
2  
3  
4  
5 21 Buckley B, Thijssen D, Murphy R, *et al.* Making a move in exercise referral: co-development of a  
6 physical activity referral scheme. *Journal of Public Health* 2018. doi:10.1093/pubmed/fdy072  
7

8  
9  
10  
11  
12 22 Buckley BJ, Thijssen DH, Murphy RC, *et al.* Preliminary effects and acceptability of a co-produced  
13 physical activity referral intervention. *Health Educ J* 2019;:001789691985332.  
14

15  
16  
17 doi:10.1177/0017896919853322  
18

19  
20  
21 23 Buckley B, Watson PM, Murphy RC, *et al.* Carotid artery function is restored in subjects with  
22 elevated cardiovascular disease risk following a 12-week physical activity intervention. *Canadian*  
23  
24  
25  
26  
27  
28  
29  
30  
31  
32  
33  
34  
35  
36  
37  
38  
39  
40  
41  
42  
43  
44  
45  
46  
47  
48  
49  
50  
51  
52  
53  
54  
55  
56  
57  
58  
59  
60  
*Journal of Cardiology* 2018; doi:10.1016/j.cjca.2018.10.015

24 Ryan R, Deci E. Self-determination theory and the facilitation of intrinsic motivation, social  
development, and well-being. *The American Psychologist* 2000;**55**:68–78.

25 Perera R, Heneghan C, Yudkin P. Graphical method for depicting randomised trials of complex  
interventions. *BMJ* 2007;**334**:127. doi:10.1136/bmj.39045.396817.68

26 Astrand I. Aerobic work capacity in men and women with special reference to age. *Acta*  
*physiologica Scandinavica Supplementum* 1960;**49**:1–92.

27 Kelly LA, McMillan DG, Anderson A, *et al.* Validity of actigraphs uniaxial and triaxial  
accelerometers for assessment of physical activity in adults in laboratory conditions. *BMC Medical*  
*Physics* 2013;**13**:1–7. doi:10.1186/1756-6649-13-5

28 Hees VT, Gorzelniak L, Leon E, *et al.* Separating movement and gravity components in an

1  
2  
3 acceleration signal and implications for the assessment of human daily physical activity. *PLoS One*  
4  
5 2013;**8**:e61691. doi:10.1371/journal.pone.0061691  
6  
7

8  
9  
10 29 Matthews CE, Hagströmer M, Pober DM, *et al.* Best Practices for Using Physical Activity Monitors  
11  
12 in Population-Based Research. *Medicine & Science in Sports & Exercise* 2012;**44**:S68.  
13  
14 doi:10.1249/MSS.0b013e3182399e5b  
15  
16

17  
18  
19 30 Bakrania K, Yates T, Rowlands AV, *et al.* Intensity Thresholds on Raw Acceleration Data: Euclidean  
20  
21 Norm Minus One (ENMO) and Mean Amplitude Deviation (MAD) Approaches. *PLOS One*  
22  
23 2016;**11**:e0164045. doi:10.1371/journal.pone.0164045  
24  
25

26  
27  
28 31 Hilded M, Hees VT, Hansen B, *et al.* Age Group Comparability of Raw Accelerometer Output from  
29  
30 Wrist- and Hip-Worn Monitors. *Medicine & Science in Sports & Exercise* 2014;**46**:1816.  
31  
32 doi:10.1249/mss.0000000000000289  
33  
34

35  
36  
37 32 Inaba Y, Chen JA, Bergmann SR. Prediction of future cardiovascular outcomes by flow-mediated  
38  
39 vasodilatation of brachial artery: a meta-analysis. *The International Journal Of Cardiovascular*  
40  
41 *Imaging* 2010;**26**:631–40. doi:10.1007/s10554-010-9616-1  
42  
43

44  
45  
46 33 van Mil A, Pouwels S, Wilbrink J, *et al.* Carotid Artery Reactivity Predicts Events in Peripheral  
47  
48 Arterial Disease Patients. *Annals of Surgery* 2017; doi:10.1097/SLA.0000000000002558  
49  
50

51  
52  
53 34 Tennant R, Hiller L, Fishwick R, *et al.* The Warwick-Edinburgh Mental Well-being Scale  
54  
55 (WEMWBS): development and UK validation. *Health Qual Life Out* 2007;**5**:1–13. doi:10.1186/1477-  
56  
57 7525-5-63  
58  
59  
60

1  
2  
3 35 Clausen J, Marott JL, Holtermann A, *et al.* Midlife Cardiorespiratory Fitness and the Long-Term  
4 Risk of Mortality 46 Years of Follow-Up. *J Am Coll Cardiol* 2018;**72**:987–95.

5  
6  
7 doi:10.1016/j.jacc.2018.06.045

8  
9  
10  
11  
12 36 Kodama S, Saito K, Tanaka S, *et al.* Cardiorespiratory fitness as a quantitative predictor of all-  
13 cause mortality and cardiovascular events in healthy men and women: a meta-analysis. *JAMA*  
14 2009;**301**:2024–35. doi:10.1001/jama.2009.681

15  
16  
17  
18  
19  
20  
21 37 Simmons R, Griffin S, Steele R, *et al.* Increasing overall physical activity and aerobic fitness is  
22 associated with improvements in metabolic risk: cohort analysis of the ProActive trial. *Diabetologia*  
23 2008;**51**:787–94. doi:10.1007/s00125-008-0949-4

24  
25  
26  
27  
28  
29  
30 38 Department of Health. Start Active, Stay Active – A report on physical activity for health from the  
31 four home countries' Chief Medical Officers. London: *Department of Health* 2011.

32  
33  
34  
35  
36  
37 39 Berlin JE, Storti KL, Brach JS. Using Activity Monitors to Measure Physical Activity in Free-Living  
38 Conditions. *Physical Therapy* 2006;**86**:1137–45. doi:10.1093/ptj/86.8.1137

39  
40  
41  
42  
43 40 Morris S, Earl K. Health Survey for England 2016 Well-being and mental health. *Health and Social*  
44 *Care Information Centre* 2017.

45  
46  
47  
48  
49  
50 41 Wade M, Mann S, Copeland RJ, *et al.* The effect of exercise referral schemes upon health and  
51 wellbeing: Initial observational insights using individual patient data meta-analysis from The National  
52 Referral database. doi:10.31236/osf.io/yebmr

53  
54  
55  
56  
57  
58  
59 42 Shah N, Cader M, Andrews WP, *et al.* Responsiveness of the Short Warwick Edinburgh Mental  
60

1  
2  
3 Well-Being Scale (SWEMWBS): evaluation a clinical sample. *Health and Quality of Life Outcomes*  
4  
5 2018;**16**:239. doi:10.1186/s12955-018-1060-2  
6  
7

8  
9  
10 43 Craig P, Dieppe P, Macintyre S, *et al*. Developing and evaluating complex interventions: the new  
11  
12 Medical Research Council guidance. *BMJ* 2008;**337**:a1655. doi:10.1136/bmj.a1655  
13  
14

15  
16 44 Rutter H, Savona N, Glonti K, *et al*. The need for a complex systems model of evidence for public  
17  
18 health. *Lancet* 2017;**17**:1267–9. doi:10.1016/S0140-6736  
19  
20

21  
22  
23 45 Oliver K, Kothari A, Mays N. The dark side of coproduction: do the costs outweigh the benefits for  
24  
25 health research? *Health Research Policy and Systems* 2019;**17**:33. doi:10.1186/s12961-019-0432-3  
26  
27

28  
29  
30 46 Batalden M, Batalden P, Margolis P, *et al*. Coproduction of healthcare service. *BMJ Quality &*  
31  
32 *Safety* 2016;**25**:509–17. doi:10.1136/bmjqs-2015-004315  
33  
34  
35  
36  
37  
38  
39  
40  
41  
42  
43  
44  
45  
46  
47  
48  
49  
50  
51  
52  
53  
54  
55  
56  
57  
58  
59  
60

## STROBE Statement

Checklist of items that should be included in reports of observational studies

| Section/Topic                                                                                      | Item No | Recommendation                                                                                                                                                                             | Reported on Page No |
|----------------------------------------------------------------------------------------------------|---------|--------------------------------------------------------------------------------------------------------------------------------------------------------------------------------------------|---------------------|
| <b>Title and abstract</b>                                                                          | 1       | (a) Indicate the study's design with a commonly used term in the title or the abstract                                                                                                     | 1,2                 |
|                                                                                                    |         | (b) Provide in the abstract an informative and balanced summary of what was done and what was found                                                                                        | 2                   |
| <b>Introduction</b>                                                                                |         |                                                                                                                                                                                            |                     |
| Background/rationale                                                                               | 2       | Explain the scientific background and rationale for the investigation being reported                                                                                                       | 3,4                 |
| Objectives                                                                                         | 3       | State specific objectives, including any prespecified hypotheses                                                                                                                           | 4                   |
| <b>Methods</b>                                                                                     |         |                                                                                                                                                                                            |                     |
| Study design                                                                                       | 4       | Present key elements of study design early in the paper                                                                                                                                    | 4                   |
| Setting                                                                                            | 5       | Describe the setting, locations, and relevant dates, including periods of recruitment, exposure, follow-up, and data collection                                                            | 4,5                 |
| Participants                                                                                       | 6       | (a) <i>Cohort study</i> —Give the eligibility criteria, and the sources and methods of selection of participants. Describe methods of follow-up                                            | 4,5                 |
|                                                                                                    |         | <i>Case-control study</i> —Give the eligibility criteria, and the sources and methods of case ascertainment and control selection. Give the rationale for the choice of cases and controls |                     |
|                                                                                                    |         | <i>Cross-sectional study</i> —Give the eligibility criteria, and the sources and methods of selection of participants                                                                      |                     |
| Variables                                                                                          | 7       | (b) <i>Cohort study</i> —For matched studies, give matching criteria and number of exposed and unexposed                                                                                   | 7,8                 |
|                                                                                                    |         | <i>Case-control study</i> —For matched studies, give matching criteria and the number of controls per case                                                                                 |                     |
| Data sources/measurement                                                                           | 8*      | Clearly define all outcomes, exposures, predictors, potential confounders, and effect modifiers. Give diagnostic criteria, if applicable                                                   | 7,8                 |
| Bias                                                                                               | 9       | For each variable of interest, give sources of data and details of methods of assessment (measurement). Describe comparability of assessment methods if there is more than one group       | 8                   |
| Study size                                                                                         | 10      | Describe any efforts to address potential sources of bias                                                                                                                                  | 8                   |
| Quantitative variables                                                                             | 11      | Explain how the study size was arrived at                                                                                                                                                  | 8                   |
| Statistical methods                                                                                | 12      | Explain how quantitative variables were handled in the analyses. If applicable, describe which groupings were chosen and why                                                               | 8,9                 |
|                                                                                                    |         | (a) Describe all statistical methods, including those used to control for confounding                                                                                                      | 8,9                 |
|                                                                                                    |         | (b) Describe any methods used to examine subgroups and interactions                                                                                                                        | 8,9                 |
|                                                                                                    |         | (c) Explain how missing data were addressed                                                                                                                                                | 8,9                 |
|                                                                                                    |         | (d) <i>Cohort study</i> —If applicable, explain how loss to follow-up was addressed                                                                                                        | 8,9                 |
| <i>Case-control study</i> —If applicable, explain how matching of cases and controls was addressed |         |                                                                                                                                                                                            |                     |
|                                                                                                    |         | <i>Cross-sectional study</i> —If applicable, describe analytical methods taking account of sampling strategy                                                                               |                     |
|                                                                                                    |         | (e) Describe any sensitivity analyses                                                                                                                                                      |                     |

| Section/Topic            | Item No | Recommendation                                                                                                                                                                                               | Reported on Page No |
|--------------------------|---------|--------------------------------------------------------------------------------------------------------------------------------------------------------------------------------------------------------------|---------------------|
| <b>Results</b>           |         |                                                                                                                                                                                                              |                     |
| Participants             | 13*     | (a) Report numbers of individuals at each stage of study—eg numbers potentially eligible, examined for eligibility, confirmed eligible, included in the study, completing follow-up, and analysed            | 9                   |
|                          |         | (b) Give reasons for non-participation at each stage                                                                                                                                                         |                     |
|                          |         | (c) Consider use of a flow diagram                                                                                                                                                                           |                     |
| Descriptive data         | 14*     | (a) Give characteristics of study participants (eg demographic, clinical, social) and information on exposures and potential confounders                                                                     | 10                  |
|                          |         | (b) Indicate number of participants with missing data for each variable of interest                                                                                                                          |                     |
|                          |         | (c) <i>Cohort study</i> —Summarise follow-up time (eg, average and total amount)                                                                                                                             |                     |
| Outcome data             | 15*     | <i>Cohort study</i> —Report numbers of outcome events or summary measures over time                                                                                                                          | 11                  |
|                          |         | <i>Case-control study</i> —Report numbers in each exposure category, or summary measures of exposure                                                                                                         |                     |
|                          |         | <i>Cross-sectional study</i> —Report numbers of outcome events or summary measures                                                                                                                           |                     |
| Main results             | 16      | (a) Give unadjusted estimates and, if applicable, confounder-adjusted estimates and their precision (eg, 95% confidence interval). Make clear which confounders were adjusted for and why they were included | 11                  |
|                          |         | (b) Report category boundaries when continuous variables were categorized                                                                                                                                    |                     |
|                          |         | (c) If relevant, consider translating estimates of relative risk into absolute risk for a meaningful time period                                                                                             |                     |
| Other analyses           | 17      | Report other analyses done—eg analyses of subgroups and interactions, and sensitivity analyses                                                                                                               |                     |
| <b>Discussion</b>        |         |                                                                                                                                                                                                              |                     |
| Key results              | 18      | Summarise key results with reference to study objectives                                                                                                                                                     | 14                  |
| Limitations              | 19      | Discuss limitations of the study, taking into account sources of potential bias or imprecision. Discuss both direction and magnitude of any potential bias                                                   | 16,17               |
| Interpretation           | 20      | Give a cautious overall interpretation of results considering objectives, limitations, multiplicity of analyses, results from similar studies, and other relevant evidence                                   | 17                  |
| Generalisability         | 21      | Discuss the generalisability (external validity) of the study results                                                                                                                                        | 17                  |
| <b>Other Information</b> |         |                                                                                                                                                                                                              |                     |
| Funding                  | 22      | Give the source of funding and the role of the funders for the present study and, if applicable, for the original study on which the present article is based                                                | 18                  |

\*Give information separately for cases and controls in case-control studies and, if applicable, for exposed and unexposed groups in cohort and cross-sectional studies.

**Note:** An Explanation and Elaboration article discusses each checklist item and gives methodological background and published examples of transparent reporting. The STROBE checklist is best used in conjunction with this article (freely available on the Web sites of PLoS Medicine at <http://www.plosmedicine.org/>, Annals of Internal Medicine at <http://www.annals.org/>, and Epidemiology at <http://www.epidem.com/>). Information on the STROBE Initiative is available at [www.strobe-statement.org](http://www.strobe-statement.org).

# BMJ Open

## Pragmatic evaluation of a co-produced physical activity referral scheme: A quasi-experimental study

|                                 |                                                                                                                                                                                                                                                                                                                                                                                                                                                                                                                                                                                                                                                                                                |
|---------------------------------|------------------------------------------------------------------------------------------------------------------------------------------------------------------------------------------------------------------------------------------------------------------------------------------------------------------------------------------------------------------------------------------------------------------------------------------------------------------------------------------------------------------------------------------------------------------------------------------------------------------------------------------------------------------------------------------------|
| Journal:                        | <i>BMJ Open</i>                                                                                                                                                                                                                                                                                                                                                                                                                                                                                                                                                                                                                                                                                |
| Manuscript ID                   | bmjopen-2019-034580.R1                                                                                                                                                                                                                                                                                                                                                                                                                                                                                                                                                                                                                                                                         |
| Article Type:                   | Original research                                                                                                                                                                                                                                                                                                                                                                                                                                                                                                                                                                                                                                                                              |
| Date Submitted by the Author:   | 07-Feb-2020                                                                                                                                                                                                                                                                                                                                                                                                                                                                                                                                                                                                                                                                                    |
| Complete List of Authors:       | Buckley, Benjamin; Liverpool John Moores University, Physical Activity Exchange<br>Thijssen, Dick; Liverpool John Moores University<br>Murphy, Rebecca; Liverpool John Moores University, Research Institute for Sport and Exercise Sciences<br>Graves, Lee; Liverpool John Moores University,<br>Cochrane, Madeleine; Liverpool John Moores University, Physical Activity Exchange<br>Gillison, Fiona; University of Bath, Department for Health<br>Crone, Diane; Cardiff Metropolitan University<br>Wilson, Philip; Brock University<br>Whyte, Greg; Liverpool John Moores University<br>Watson, Paula; Liverpool John Moores University, Research Institute for Sport and Exercise Sciences |
| <b>Primary Subject Heading</b>: | Sports and exercise medicine                                                                                                                                                                                                                                                                                                                                                                                                                                                                                                                                                                                                                                                                   |
| Secondary Subject Heading:      | Public health, Cardiovascular medicine                                                                                                                                                                                                                                                                                                                                                                                                                                                                                                                                                                                                                                                         |
| Keywords:                       | Cardiovascular Health, Self-Determination Theory, Exercise Referral, Behaviour Change, Translational Research                                                                                                                                                                                                                                                                                                                                                                                                                                                                                                                                                                                  |
|                                 |                                                                                                                                                                                                                                                                                                                                                                                                                                                                                                                                                                                                                                                                                                |

SCHOLARONE™  
Manuscripts





I, the Submitting Author has the right to grant and does grant on behalf of all authors of the Work (as defined in the below author licence), an exclusive licence and/or a non-exclusive licence for contributions from authors who are: i) UK Crown employees; ii) where BMJ has agreed a CC-BY licence shall apply, and/or iii) in accordance with the terms applicable for US Federal Government officers or employees acting as part of their official duties; on a worldwide, perpetual, irrevocable, royalty-free basis to BMJ Publishing Group Ltd ("BMJ") its licensees and where the relevant Journal is co-owned by BMJ to the co-owners of the Journal, to publish the Work in this journal and any other BMJ products and to exploit all rights, as set out in our [licence](#).

The Submitting Author accepts and understands that any supply made under these terms is made by BMJ to the Submitting Author unless you are acting as an employee on behalf of your employer or a postgraduate student of an affiliated institution which is paying any applicable article publishing charge ("APC") for Open Access articles. Where the Submitting Author wishes to make the Work available on an Open Access basis (and intends to pay the relevant APC), the terms of reuse of such Open Access shall be governed by a Creative Commons licence – details of these licences and which [Creative Commons](#) licence will apply to this Work are set out in our licence referred to above.

Other than as permitted in any relevant BMJ Author's Self Archiving Policies, I confirm this Work has not been accepted for publication elsewhere, is not being considered for publication elsewhere and does not duplicate material already published. I confirm all authors consent to publication of this Work and authorise the granting of this licence.

1  
2  
3 1 **Pragmatic evaluation of a co-produced physical activity referral scheme: A quasi-experimental**  
4  
5  
6 2 **study**  
7  
8  
9

10  
11 3 Benjamin J. R. Buckley<sup>a</sup>, Dick H. J. Thijssen<sup>a,e</sup>, Rebecca C. Murphy<sup>a</sup>, Lee E. F. Graves<sup>a</sup>,  
12 4 Madeleine Cochrane<sup>a</sup>, Fiona Gillison<sup>b</sup>, Diane Crone<sup>c</sup>, Philip M. Wilson<sup>d</sup>, Greg Whyte<sup>a</sup> and  
13 5 Paula M. Watson<sup>a</sup>  
14  
15

16 6  
17 7 <sup>a</sup> Research Institute for Sport and Exercise Sciences, Liverpool John Moores University,  
18 8 Liverpool, UK

19 9 <sup>b</sup> Department for Health, University of Bath, Bath, UK

20 10 <sup>c</sup> Cardiff School of Sport and Health Sciences, Cardiff Metropolitan University, UK

21 11 <sup>d</sup> Behavioural Health Sciences Research Lab, Department of Kinesiology, Brock University,  
22 12 Ontario, Canada

23 13 <sup>e</sup> Radboud Institute for Health Sciences, Department of Physiology, Radboud University  
24 14 Medical Center, Nijmegen, Netherlands  
25  
26

27 15  
28 16  
29 17 Correspondence to Dr Ben Buckley: B.J.Buckley@ljmu.ac.uk  
30  
31  
32  
33

34 18  
35 19 Contributorship Statement

36 20 BJRБ contributed to the study design, data collection, data analysis, and preparation of the final  
37 21 document. PMW, DHJT, and RCM contributed to the study design, data analysis, and preparation of  
38 22 the final document. MC contributed to the data collection and approved the final version. LEFG, FG,  
39 23 DC, PW, and GW intellectually contributed to this paper and approved the final version.  
40  
41  
42  
43  
44  
45  
46  
47  
48  
49  
50  
51  
52  
53  
54  
55  
56  
57  
58  
59  
60

1  
2  
3 1  
4  
5 2

**Objectives.** UK exercise referral schemes (ERSs) have been criticised for focusing too much on exercise prescription and not enough on sustainable physical activity (PA) behaviour change. Previously, a theoretically-grounded intervention (Co-PARS) was co-produced to support long-term PA behaviour change in individuals with health conditions. The purpose of this study was to investigate the effectiveness of Co-PARS compared to a usual care ERS and no treatment for increasing cardiorespiratory fitness.

8 **Design.** A three-arm quasi-experimental trial.

9 **Setting.** Two leisure centres providing a) Co-PARS, b) usual exercise referral care, and one no-treatment control.

11 **Participants.** 68 adults with lifestyle-related health conditions (e.g. cardiovascular, diabetes, depression) were recruited to Co-PARS, usual care, or no treatment.

13 **Intervention.** 16-weeks of physical activity behaviour change support delivered at 4, 8, 12, and 18 weeks, in addition to the usual care 12-week leisure centre access.

15 **Outcome measures.** Cardiorespiratory fitness, vascular health, PA, and mental wellbeing were measured at baseline, 12 weeks, and 6 months (PA and mental wellbeing only). Fitness centre engagement (Co-PARS and usual care) and behaviour change consultation attendance (Co-PARS) were assessed. Following an intention-to-treat approach, repeated-measures linear mixed models were used to explore intervention effects.

20 **Results.** Significant improvements in cardiorespiratory fitness ( $p=.002$ ) and vascular health ( $p=.002$ ) were found in Co-PARS compared to usual care and no-treatment at 12 weeks. No significant changes in PA or wellbeing at 12 weeks or 6 months were noted. Intervention engagement was higher in Co-PARS than usual care, though this was not statistically significant.

24 **Conclusion.** A co-produced PA behaviour change intervention led to promising improvements in cardiorespiratory and vascular health at 12 weeks, despite no effect for PA levels at 12 weeks or 6 months.

28 **Trial registration:** ClinicalTrials.gov: NCT03490747

30 **Keywords:** Cardiovascular Health; Self-Determination Theory; Exercise Referral; Behaviour Change Intervention; Translational Research.

## Strengths and limitations of the study

- This study advances the literature on exercise referral effectiveness by pragmatically evaluating a co-produced physical activity referral intervention, which was underpinned by multiple stakeholders and behaviour change theory.
- The study documents the third phase of a novel and iterative approach which co-produced, piloted, and then evaluated (this study) a physical activity referral intervention that was deemed feasible to implement in practice.
- Objective and subjective measures provide insight into the potential effects for patient health.
- It is not possible to directly attribute intervention effects to the phased co-production approach, although supported by the Medical Research Council.
- A larger sample size is needed to substantiate findings.

## Funding

The 6-month data collection and analysis was supported by a financial grant from NHS Liverpool Clinical Commissioning Group.

## Competing interests

The authors declare that they have no competing interests.

## Authors' contributions

BB collected, analysed, and interpreted the participant data. BB and MC collected the 6-month patient outcome data. BB and PW drafted the manuscript. All authors read, contributed to, and approved the final manuscript.

## Availability of data and materials

The datasets used and/or analysed during the current study are available from the corresponding author on reasonable request.

## Word count

~3000

## Ethics approval and consent to participate

Full written consent was obtained from participants and the study was approved by NHS Research Ethics Committee (REC: 18/NW/0039 - Project: 238547).

## Acknowledgements

We would like to thank the participants in this study for their time, the delivery staff and centre managers for their ongoing support, and the initial development group involved in the co-production process.

## 1 2 3 1 4 5 2 **INTRODUCTION**

6  
7 3 Physical inactivity is the fourth leading cause of death worldwide and costs the UK an estimated £7.4  
8  
9 4 billion annually, including £0.9 billion to the NHS alone[1]. Exercise referral schemes (ERSs) provide a  
10  
11 5 promising framework to facilitate physical activity (PA) behaviour change in at-risk populations.  
12  
13 6 Typically, UK ERSs consist of a referral from a healthcare professional to a 12-16-week tailored exercise  
14  
15 7 programme provided by a qualified practitioner.

16  
17  
18 8 There is inconsistent evidence as to the effectiveness of ERSs on PA behaviour, mental well-being,  
19  
20 9 quality of life, and physical health outcomes [2–4]. More recently, however, promising effects of ERSs  
21  
22 10 have been demonstrated in Wales [5], Sweden [6], and Spain [7] and a systematic review identified  
23  
24 11 promising effects of UK ERSs on self-reported PA and cardiovascular health markers [8]. Prior and  
25  
26 12 colleagues [9] demonstrated that for every 11 participants referred to a 24-week ERS, 1 participant  
27  
28 13 went on to report achieving  $\geq 90$  min/week of PA at 12-months. For perspective, it is estimated that  
29  
30 14 67-167 patients (categorised as  $\leq 10\%$  cardiovascular disease (CVD)) need to receive statin treatment  
31  
32 15 for 5 years to prevent one major vascular event [10]. Whilst we are not suggesting PA behaviour  
33  
34 16 change is a comparable outcome to a serious clinical event, it is notable that replacing 30 minutes of  
35  
36 17 TV viewing time with PA across the UK population, could reduce premature mortality by 5-15%,  
37  
38 18 depending on activity intensity [11]. The majority of studies evaluating ERSs, however, have drawn on  
39  
40 19 self-reported PA data and future studies employing device-based measures are needed to  
41  
42 20 substantiate these observations.

43  
44  
45 21 Despite recent promise for the effectiveness of ERSs [7–9,12], substantial heterogeneity exists in both  
46  
47 22 design and delivery [13,14], reflecting varying assumptions on how best to promote health behaviour  
48  
49 23 change [15,16]. This limits potential scalability of ‘successful’ ERSs. Traditionally, ERSs have focussed  
50  
51 24 on short-term exercise prescription without appropriate evidence of effectiveness or underpinning of  
52  
53 25 behaviour change theory [17]. A recent attempt to integrate behaviour change theory into an ERS [18]  
54  
55 26 however, showed no advantage over a standard ERS at 12 weeks or 6 months. The authors noted  
56  
57  
58  
59  
60

1  
2  
3 1 considerable implementation challenges when training staff, such as work-related demands that may  
4  
5 2 have reduced the importance of the theory-based training. It is plausible that delivery staff asked to  
6  
7 3 implement interventions designed by academics may lack ownership and feel less  
8  
9 4 motivated/competent. One potential way to promote ownership and engagement might be to adopt  
10  
11 5 a co-production approach, as a means of co-creating value across the public sector [19–21]. Though  
12  
13 6 not a panacea, the involvement of practitioners, managers and service-users in co-production has  
14  
15 7 potential to improve intervention relevance, fidelity, and effectiveness [22].

16  
17  
18 8 Previously, a theoretically-grounded PA referral scheme (Co-PARS) was co-produced by academics,  
19  
20 9 policy-makers, practitioners, and service-users [23] in Liverpool, UK, with a focus on supporting  
21  
22 10 sustainable PA behaviour change. Liverpool is the 3rd most deprived local authority in England and  
23  
24 11 has the 2nd highest proportion of Lower Super Output Areas (LSOAs) in the most deprived 10%  
25  
26 12 nationally [24]. Interventional work with at-risk patients is therefore critical and is aligned with the  
27  
28 13 concept of proportionate universalism [25]. Underpinned by self-determination theory [24], the co-  
29  
30 14 produced intervention differed from usual ERS care in its focus on PA behaviour change (rather than  
31  
32 15 exercise prescription), and inclusion of frequent one-to-one consultations with exercise referral  
33  
34 16 practitioners (compared to usual care which included formal contact at induction only). A pilot of Co-  
35  
36 17 PARS [26] showed clinically meaningful improvements in cardiorespiratory fitness (CRF) and PA,  
37  
38 18 although as we did not include a usual care control, it was unknown whether these effects were due  
39  
40 19 to the fact participants were taking part in an ERS or due to the unique elements of Co-PARS.  
41  
42 20 Furthermore, despite having very low CRF ( $<27.7 \text{ ml.kg}^{-1}.\text{min}^{-1}$ ) [26] we found 64% of the baseline pilot  
43  
44 21 sample were meeting the PA guidelines [27] of at least 150 minutes moderate-intensity PA per week  
45  
46 22 (measured objectively via accelerometry). This suggested CRF may be a more appropriate primary  
47  
48 23 outcome measure than PA for this low-fit population (whilst changing PA behaviour was the focus of  
49  
50 24 the intervention, a target health outcome of this behaviour change was improved CRF). The pilot also  
51  
52 25 allowed the opportunity to investigate delivery processes, and we noted several areas that required  
53  
54 26 refinement in preparation for a controlled trial. These refinements included, increasing the number  
55  
56  
57  
58  
59  
60

1  
2  
3 1 of behaviour change consultations from four to five; enhanced focus on daily PA opportunities (rather  
4  
5 2 than focussing on activities offered at the fitness centre); adapting staff timetables to promote  
6  
7 3 consistency of care and to allow participant one-to-one consultations to take place in a private room;  
8  
9  
10 4 and reducing practitioner paperwork. Building on our previous pilot work, the aim of the current study  
11  
12 5 was to investigate the effectiveness of Co-PARS compared to a usual care ERS and a no-treatment  
13  
14 6 control on change in cardiorespiratory fitness (CRF) at 12 weeks and PA and wellbeing at 6 months.

## 7 **METHODS**

### 8 **Study Design**

9 A three-arm quasi-experimental trial involving: 1. Co-PARS (delivered at fitness centre A); 2. usual care  
10 ERS (delivered at fitness centre B); and 3. no-treatment control. This paper reports trial outcomes  
11 (CRF, vascular health, PA, mental wellbeing) measured at baseline, 12 weeks, and 6 months (PA and  
12 mental wellbeing only). Additional data were collected to investigate psychosocial processes of  
13 change, intervention fidelity and cost-effectiveness which shall be reported elsewhere. Full written  
14 consent was obtained from participants and the study was approved by NHS Research Ethics  
15 Committee (REC: 18/NW/0039 - Project: 238547) and registered on ClinicalTrials.gov (NCT03490747).

### 16 **Patient and Public Involvement**

17 The intervention was previously co-produced, piloted, and adapted with substantial service user input  
18 [23,26].

### 19 **Participants and Recruitment**

20 Inclusion criteria were the same for all three conditions (Co-PARS, usual care, no-treatment).  
21 Participants were eligible if aged  $\geq 18$  years with a health-related risk factor (e.g. hypertension,  
22 hyperglycaemia, obesity) and/or health condition (e.g. diabetes, cardiovascular disease, depression)  
23 that may be alleviated by increasing PA levels. Participants with uncontrolled health conditions, severe  
24 psychological or neurological conditions were excluded. Participants for the Co-PARS and usual care  
25 arms were recruited from fitness centre A (Co-PARS) and fitness centre B (usual care) respectively

1 (where they had been referred for exercise by a health professional). Reception staff at both centres  
2 provided study information and gained consent to pass participant details to the researcher.  
3 Participants for the no-treatment control were recruited via posters, electronic invitations, and email  
4 communications primarily at the university site. Participants were not eligible for the no-treatment  
5 control if they were currently attending an exercise referral scheme. Interested participants for all  
6 groups were sent an information sheet and baseline data collection was arranged.

## 7 **Study Arms**

8 Intervention arm components are presented in Figure 1.

9 ***Usual care exercise referral scheme (ERS – centre B).*** Usual care followed a standard ERS model of 12-  
10 week subsidised access to a fitness centre (swimming, gym, group classes). Participants met an  
11 exercise referral practitioner for an initial, 1-hour induction (week 1) during which a 12-week exercise  
12 programme was provided for the participant. Any further contact with a practitioner was informal and  
13 opportunistic. This system was already in place and was considered usual care for the local area.  
14 Centre B was chosen as a comparison centre due to its similarity in referral numbers and socio-  
15 economic make-up of the local population to centre A (where Co-PARS was being delivered). For  
16 example, based on areas within Liverpool ranked from 1 (most deprived) to 30 (least deprived), usual  
17 care ERS and Co-PARS were ranked respectively: 20th and 21st (income), 20th and 21st (employment),  
18 22nd and 24th (Education) and 10th and 11th (living environment).

## 19 ***Co-produced PA referral scheme (Co-PARS – centre A)***

20 Participants received the same 12-week subsidised access to a fitness centre as usual care plus a series  
21 of one-to-one behaviour change consultations (60-minute induction followed by 30-minute  
22 consultations at weeks 4, 8, 12 and 18). A log book was provided for each participant to set action  
23 plans, log progress and facilitate consultation discussions. Consultations were delivered by exercise  
24 referral practitioners in an autonomy supportive counselling style, drawing on the principles of self-  
25 determination theory [28]. This additional support aimed to encourage habitual opportunities to



1  
2  
3 1 increase PA as well as activities available at the fitness centre. A full description of the theoretical  
4  
5 2 underpinning and behaviour change intervention components is available elsewhere [23].  
6  
7

8 3 Prior to the pilot of Co-PARS [26] practitioners received training in self-determination theory-based  
9  
10 4 communication strategies led by a sport and exercise psychologist (last author [PW]), involving a  
11  
12 5 workshop, one-to-one sessions and follow-up group meetings. Following the pilot, a further series of  
13  
14 6 group meetings involving ERPs and the research team were held to develop aspects of delivery that  
15  
16 7 required refinement (as outlined in the introduction). Full details of the training are available from  
17  
18 8 [p.m.watson@ljmu.ac.uk](mailto:p.m.watson@ljmu.ac.uk).  
19  
20  
21

22 9 **No-treatment control (NTC).** Participants received a lifestyle advice booklet only (offered to all study  
23  
24 10 arms at baseline data collection), based on national guidance for PA, nutrition, smoking cessation and  
25  
26 11 alcohol consumption.  
27  
28  
29

30 12 [INSERT FIGURE 1 SOMEWHERE HERE]  
31  
32  
33

#### 34 14 **Outcome measures**

35  
36  
37 15 **Primary outcome:** *Cardio-respiratory fitness (CRF).* Maximal oxygen consumption ( $VO_2\max^{-2}$ ) was  
38  
39 16 estimated via the sub-maximal Astrand-Rhyming cycle ergometer protocol [29]. The protocol is a  
40  
41 17 single-stage cycling test designed to elicit a steady-state heart rate over a period of ~6 minutes.  
42  
43

44 18 *Accelerometer-derived PA.* Tri-axial ActiGraph GT3x accelerometers (ActiGraph, Pensacola, FL, USA)  
45  
46 19 measured PA for 7 days, which have been validated in a comparable population [30]. Raw triaxial  
47  
48 20 acceleration values were converted into an omnidirectional measure of acceleration, referred to as  
49  
50 21 Euclidian norm minus one [31]. Minimum wear time was 10 hours per day and 3 days per week  
51  
52 22 including one weekend day [32]. The R package GGIR [31] facilitated extraction of user-defined  
53  
54 23 acceleration thresholds: 5.9 to 69.1 mg for light-intensity PA [33], 69.1 to 258.7 mg as moderate and  
55  
56 24 >258.7 mg as vigorous-intensity PA [34].  
57  
58  
59  
60

1  
2  
3 1 *Vascular health.* Our previous work has demonstrated carotid artery reactivity (CAR) may be a  
4  
5 2 promising outcome variable to assess in PA interventions for at-risk populations [35]. Further,  
6  
7 3 endothelial function may provide prognostic value beyond that of traditional risk factors [36] with an  
8  
9 4 increase of 1% in brachial artery flow-mediated dilation (FMD) associated with a 12-15% lower risk of  
10  
11 5 CV events [33,34]. FMD and CAR were measured using ultrasound techniques [35]. Both techniques  
12  
13 6 measure vascular endothelial function and have independently predicted future risk of cardiovascular  
14  
15 7 events in humans [36,37]. Blood pressure was measured in the supine position using an automated  
16  
17 8 blood pressure device (Omron Healthcare UK Limited, Milton Keynes, UK).

18  
19  
20  
21 9 *Anthropometric measures.* Since obesity is a critical risk factor for poor health and cardiovascular  
22  
23 10 disease, anthropometric variables were measured to investigate potential intervention effects on  
24  
25 11 body mass. Waist-to-height ratio is a stronger predictor of early health risk than Body Mass Index  
26  
27 12 (BMI) alone [38], therefore we collected both BMI (mass in kg / stature in m<sup>2</sup>) and waist-to-height  
28  
29 13 ratio (waist circumference / stature).

30  
31  
32  
33 14 *Mental wellbeing.* As PA is known to enhance mental wellbeing [39] and clinical populations are more  
34  
35 15 susceptible to mental ill-health [40], it was important to identify whether Co-PARS led to any changes  
36  
37 16 in mental health (positive or negative). Mental wellbeing was measured using the 14-item Warwick-  
38  
39 17 Edinburgh Mental Well-being Scale (WEMWBS; [41], which asks participants to rate their  
40  
41 18 psychological wellbeing (e.g. "I've been feeling cheerful") over the previous 2 weeks (measured on a  
42  
43 19 likert scale of 1 (none of the time) to 5 (all of the time)).

44  
45  
46  
47 20 *Fitness centre engagement (Co-PARS and usual care only).* The number of occasions participants  
48  
49 21 attended the fitness centre between baseline and 12 weeks (weekly attendance) and 12 weeks to 6  
50  
51 22 months (monthly attendance) was obtained from computerised attendance records. When  
52  
53 23 measuring intervention engagement it was deemed inappropriate to calculate the mean number of  
54  
55 24 sessions per week, since this could exaggerate the engagement of individuals who attended with  
56  
57 25 high frequency in the early weeks then dropped out (when compared with individuals who attended  
58  
59  
60

1 moderately but consistently for the full 12 weeks). Therefore a formula was used to calculate a  
 2 percentage for '12-week engagement' (based on the recommended bi-weekly attendance):

$$\left( \frac{((n1*0.5) + (n2) + (n3*1.2))}{12} \right) * 100$$

|                                                                                                                                                                                                                            |
|----------------------------------------------------------------------------------------------------------------------------------------------------------------------------------------------------------------------------|
| <p>n1 = number of weeks in which participant attends once only<br/>         n2 = number of weeks in which participant attends twice<br/>         n3 = number of weeks in which participant attends three or more times</p> |
|----------------------------------------------------------------------------------------------------------------------------------------------------------------------------------------------------------------------------|

3 This formula took into account both *frequency* and *consistency* of attendance to yield a percentage  
 4 score that ranged from 0% (no attendance) to 120% (attendance of three or more times per week  
 5 for the whole 12 weeks).

6 Monthly attendance post-12 weeks was calculated as a mean attendance across months 4 to 6,  
 7 therefore did not take consistency of attendance into account.

8 *Behaviour change consultation attendance (Co-PARS only)*. The number of consultations offered and  
 9 attended were measured by exercise referral practitioners at induction, 4, 8, 12, and 18 weeks.

### 10 **Sample size**

11 Sample size was determined to detect a meaningful difference in CRF at 12 weeks based on our pilot  
 12 results [26]. To detect a difference of 2 ml.kg<sup>-1</sup>min<sup>-1</sup> between Co-PARS and usual care, 42 participants  
 13 were required per arm (f= .25, p= .05, power = .80). To detect a difference of 3.2 ml.kg<sup>-1</sup>min<sup>-1</sup> between  
 14 the intervention arms and the no-treatment control, 17 participants were required for the no-  
 15 treatment control (f= .5, p= .05, power = .80). Thus, a total sample of 101 participants were required.

### 16 **Statistical analyses**

17 An intention-to-treat approach was used assuming no change in non-respondents (last observation  
 18 carried forward) to produce a conservative estimate of intervention effects. Delta changes (Δ) from  
 19 pre- to post-intervention were calculated for each group and entered as the dependent variable in  
 20 repeated measures linear mixed model analyses. A random intercept model was used with fixed

1 effects for study arm (Co-PARS, usual care ERS, no-treatment control) and time (baseline-to-week-12  
2 change, week-12-to-6-month change, and baseline-to-6-month change) and participants included as  
3 random effects. Least squared difference (LSD) was used for post hoc testing. Testing for baseline  
4 differences to identify covariates was avoided, as this method has been demonstrated to inflate bias,  
5 instead pre-intervention was entered into the model as a covariate. Furthermore, all linear mixed  
6 model analyses were repeated with age and employment as covariates as a comparison to the results  
7 presented in this study (with baseline score as a covariate) due to their known prognostic value. Using  
8 age and employment as covariates resulted in no change in inferences presented in this study. One-  
9 way ANOVAs were used to compare baseline values between intervention arms. Fitness centre  
10 engagement was determined as describe above. Behaviour change consultation attendance is  
11 presented descriptively. For non-normally distributed data, median and interquartile range is  
12 presented and within group median change was calculated via Wilcoxon signed-rank tests.

## 13 RESULTS

14 *Participants.* 68 participants provided baseline data, 56 of whom provided 12-week data, and 58 of  
15 whom provided 6-month data (figure 2).

16 **Baseline characteristics (table 1).** No significant differences were noted between arms for age, sex,  
17 ethnicity, BMI, referral reason, or accelerometer-derived PA levels ( $p>.05$ ). Full-time employment  
18 status ( $p=.001$ ) and CRF ( $p=.015$ ) were significantly higher in the control compared to usual care and  
19 Co-PARS. Smoking status was significantly higher in usual care compared to Co-PARS and control  
20 ( $p=.010$ ). Mental wellbeing was significantly lower in Co-PARS compared to control ( $p=.023$ ).

21  
22 [INSERT FIGURE 2 SOMEWHERE HERE]  
23  
24

1

**Table 1.** Baseline characteristics presented as Mean  $\pm$  SD or % (n) of group.

|                                                    | Co-produced PA referral<br>(n=33) | Usual care ERS<br>(n=19) | No-treatment control<br>(n=16) | Between arm<br><i>p</i> -value |
|----------------------------------------------------|-----------------------------------|--------------------------|--------------------------------|--------------------------------|
| Age (years)                                        | 57 $\pm$ 12                       | 53 $\pm$ 16              | 48 $\pm$ 15                    | <i>p</i> =.319                 |
| Female (% of sample)                               | 58 (19)                           | 47 (9)                   | 56 (9)                         | <i>p</i> =.774                 |
| White British (% of sample)                        | 82 (27)                           | 95 (18)                  | 75 (12)                        | <i>p</i> =.132                 |
| Full-time employment (% of sample)                 | 18 (6)                            | 26 (5)                   | 62 (10)                        | <i>p</i> =.001                 |
| Never smoked (% of sample)                         | 73 (24)                           | 37 (7)                   | 81 (13)                        | <i>p</i> =.002                 |
| Body mass index (kg/m <sup>2</sup> )               | 31 $\pm$ 7                        | 33 $\pm$ 6               | 29 $\pm$ 6                     | <i>p</i> =.226                 |
| Systolic blood pressure (mmHg)                     | 131 $\pm$ 11                      | 138 $\pm$ 18             | 123 $\pm$ 12                   | <i>p</i> =.010                 |
| Primary referral reason / health concern (control) |                                   |                          |                                | <i>p</i> =.132                 |
| Cardiometabolic (% of sample)                      | 67 (22)                           | 43 (8)                   | 62 (10)                        | -                              |
| Cancer (% of sample)                               | 6 (2)                             | 5 (1)                    | 6 (1)                          | -                              |
| Mental Health (% of sample)                        | 18 (6)                            | 26 (5)                   | 19 (3)                         | -                              |
| Musculoskeletal (% of sample)                      | 9 (3)                             | 26 (5)                   | 13 (2)                         | -                              |
| Comorbidity (% of sample)                          | 85 (28)                           | 100 (19)                 | 81 (13)                        | <i>p</i> =.166                 |
| Meeting the PA guidelines (% of sample)*           | 73 (22)                           | 71 (10)                  | 93 (13)                        | <i>p</i> =.223                 |

*P*-values represent between arm baseline effects. There was no between arm effect for referral reason, thus no between arm *p*-values are provided for referral reason sub groups.  
\*Chief Medical Officers' 2019 physical activity guidelines: 150 minutes of moderate-intensity physical activity per week.

2

**3 Baseline-to-12-Week effects**

4 Raw outcome values are presented for baseline, week 12, and 6 months in Table 2. There was a  
5 significant effect for study arm in baseline-to-12-week change in CRF (*p*=.002). Post hoc testing  
6 revealed a significantly higher CRF change in Co-PARS (2.4) compared to the ERS (0.3; *p*=.021) and  
7 control (-0.6; *p*=.001), but no difference between the ERS and control (*p*=.314). A significant effect for

1 study arm was found in change in FMD% ( $p=.002$ ), with FMD% change significantly higher in Co-PARS  
2 (2.4) compared to control ( $-1.1$ ;  $p=.001$ ) but not the ERS ( $0.8$ ;  $p=.099$ ). The change in FMD% was not  
3 significantly different between the ERS and control ( $p=.71$ ). No statistically significant study arm  
4 effects were noted for changes in CAR%, blood pressure, resting heart rate, anthropometric measures,  
5 PA or WEMWBS at 12 weeks ( $p>.05$ ).

#### 6 **Baseline-to-6-month effects**

7 No statistically significant study arm effects were noted for change in WEMWBS or PA at 6 months  
8 ( $p>.05$ ).

#### 9 **Fitness centre engagement (Co-PARS and usual care ERS) and consultation attendance (Co-PARS 10 only).**

11 Table 3 reports the participant fitness centre engagement data for the Co-PARS and usual care ERS.  
12 Although not statistically significant, Co-PARS engagement was 9% higher, participants attended the  
13 fitness centre on average 3 times more per month, and 23% more participants were attending the  
14 fitness centre beyond 6-months follow-up compared to usual care. Co-PARS behaviour change  
15 consultation attendance is reported in Table 4.

16

**Table 2.** Cardiometabolic health outcomes and PA levels at baseline, 12 weeks, 6 months, and between arm baseline-to 12-week or 6-month effect. All variables are presented as Mean ± SD.

|                                                | Co-PARS   |           |         | Usual Care ERS |           |         | No-Treatment Control |           |         | Between arm effect p-value <sup>(a)</sup> |
|------------------------------------------------|-----------|-----------|---------|----------------|-----------|---------|----------------------|-----------|---------|-------------------------------------------|
|                                                | Baseline  | Week 12   | 6 Month | Baseline       | Week 12   | 6 Month | Baseline             | Week 12   | 6 Month |                                           |
| <b>Fitness (n=56)</b>                          |           |           |         |                |           |         |                      |           |         |                                           |
| <i>CRF ml.kg.<sup>-1</sup>min<sup>-1</sup></i> | 22.2±7    | 24.6±7    | -       | 23.3±6.6       | 23.6±7    | -       | 29.6±9.2             | 28.9±8.7  | -       | p=.002                                    |
| <b>Physical Activity</b>                       |           |           |         |                |           |         |                      |           |         |                                           |
| <b>GT3x (n= 61) Mins.day</b>                   |           |           |         |                |           |         |                      |           |         |                                           |
| <i>Light intensity</i>                         | 90±52     | 98±64     | 107±75  | 98±36          | 93±31     | 158±145 | 90±37                | 101±33    | 86±40   | p=.332                                    |
| <i>Moderate intensity</i>                      | 44±32     | 42±29     | 42±33   | 43±28          | 43±30     | 55±55   | 60±31                | 65±24     | 54±21   | p=.260                                    |
| <i>Vigorous intensity</i>                      | 1±3       | 1±2       | 1±2     | 1±2            | 1±1       | 1±2     | 2±4                  | 2±3       | 3±8     | p=.108                                    |
| <b>Vascular Ultrasound (n=64)</b>              |           |           |         |                |           |         |                      |           |         |                                           |
| <i>CAR%</i>                                    | 1.7±2.7   | 2.8±2.2   | -       | 2.7±1.8        | 3.9±2.8   | -       | 2.5±2.7              | 1.7±2.7   | -       | p=.073                                    |
| <i>CAR Baseline cm</i>                         | 0.69±0.07 | 0.69±0.06 | -       | 0.69±0.08      | 0.7±0.09  | -       | 0.65±0.07            | 0.64±0.06 | -       | p=.130                                    |
| <i>FMD%</i>                                    | 4.4±2.3   | 6.8±2.7   | -       | 4.2±2          | 5±2.1     | -       | 6.2±2.1              | 5.2±2.8   | -       | p=.002                                    |
| <i>FMD Baseline cm</i>                         | 0.39±0.07 | 0.38±0.06 | -       | 0.39±0.09      | 0.41 0.08 | -       | 0.38±0.08            | 0.37±0.06 | -       | p=.728                                    |
| <b>Cardiometabolic (n=68)</b>                  |           |           |         |                |           |         |                      |           |         |                                           |
| <i>BMI kg.m<sup>2</sup></i>                    | 31±7      | 30±7      | -       | 33±6           | 32±6      | -       | 29±6                 | 29±6      | -       | p=.323                                    |
| <i>WHR</i>                                     | 62±9      | 61±10     | -       | 64±8           | 63±8      | -       | 56±9                 | 56±9      | -       | p=.261                                    |
| <i>SBP mmHg</i>                                | 131±11    | 127±12    | -       | 138±18         | 132±15    | -       | 123±12               | 118±13    | -       | p=.937                                    |
| <i>DBP mmHg</i>                                | 73±7      | 71±8      | -       | 73±9           | 71±11     | -       | 72±11                | 68±10     | -       | p=.584                                    |
| <i>RHR bpm</i>                                 | 70±10     | 65±10     | -       | 70±12          | 68±11     | -       | 66±12                | 63±9      | -       | p=.540                                    |
| <b>Mental Wellbeing (n=68)</b>                 |           |           |         |                |           |         |                      |           |         |                                           |
| <i>WEMWBS</i>                                  | 46±9      | 51±10     | 48±10   | 49±10          | 52±11     | 50±13   | 53±9                 | 56±9      | 53±10   | p=.796                                    |

Co-PARS, Co-produced PA referral scheme; ERS, Exercise referral scheme; CRF, Cardiorespiratory Fitness; GT3x, Accelerometer; CAR, Carotid artery reactivity; FMD, Flow-mediated dilation; BMI, Body Mass Index; WHR, Waist-to-Height ratio; SBP, Systolic blood pressure; DBP, Diastolic blood pressure; RHR, Resting heart rate, WEMWBS, Warwick-Edinburgh Mental Wellbeing Scale  
<sup>a</sup> F-statistic for between arm baseline-to-6-month change or baseline-to-week 12 change if variable not collected at 6 months.  
Missing data was due to inability to complete the CRF test (n=12), inability to complete the vascular ultrasound protocols (n=4), and insufficient accelerometer wear time or non-return (n=7).

**Table 3.** Fitness centre engagement.

|                                                                                                 | Co-PARS | Usual Care | Between centre difference |
|-------------------------------------------------------------------------------------------------|---------|------------|---------------------------|
|                                                                                                 | (n=33)  | (n=19)     |                           |
| % Engagement <sup>a</sup> (Mean ± SD)                                                           | 42±29   | 33±27      | <i>p</i> =.267            |
| Number of fitness centre visits (per person per month) week 12 to 6 months (Med, IQR)           | 3(0-14) | 0 (0-1)    | <i>p</i> =.072            |
| % of baseline sample who attended fitness centre at least once beyond 6 months (% of sample, n) | 39 (13) | 16 (3)     | <i>p</i> =.101            |

<sup>a</sup>Based on the formula  $((n1*0.5)+(n2)+(n3*1.2))/12 * 100$ ; n1=number of weeks in which participant attends once only; n2=number of weeks in which participant attends twice; n3=number of weeks in which participant attends three or more times. <sup>a</sup>**Engagement**; based on a recommended attendance of twice weekly, a formula was used to calculate a percentage for "12-week engagement", which took into account both frequency and consistency of attendance (see methods).

**Table 4.** Co-PARS behaviour change consultation attendance (based on baseline sample of 33 participants).

| Consultation | % Booked (n) | % Attended (n) |
|--------------|--------------|----------------|
| Induction    | 91(30)       | 93(28)         |
| Week 4       | 82(27)       | 78(21)         |
| Week 8       | 67(22)       | 91(20)         |
| Week 12      | 64(21)       | 81(17)         |
| Week 18      | 55(18)       | 50(9)          |



## 1 DISCUSSION

2 This was the first study to investigate the effectiveness of a theoretically-grounded, co-produced PA  
3 referral scheme (Co-PARS) compared to a usual care ERS and no treatment. Despite challenges in  
4 recruitment that meant the study was statistically underpowered, the findings demonstrated  
5 significant and clinically meaningful improvements in CRF and vascular health in Co-PARS compared  
6 to the usual care and no treatment. No statistically significant effects were noted for accelerometer-  
7 derived PA levels or mental wellbeing at 12-weeks or 6-months.

8 The effect of usual care ERSs compared to theoretically-grounded interventions on CRF has not been  
9 previously explored. We observed a significant increase in CRF in Co-PARS compared to usual care and  
10 a no-treatment control. According to values reported by [42] both Co-PARS (22 ml.kg.<sup>-1</sup>min<sup>-1</sup>) and usual  
11 care (23 ml.kg.<sup>-1</sup>min<sup>-1</sup>) participants were below the lower limit of 'healthy' (27.7 ml.kg.<sup>-1</sup>min<sup>-1</sup>) for  
12 baseline CRF [43]. As low CRF is associated with a substantially elevated risk of all-cause mortality [43],  
13 the magnitude of change demonstrated in Co-PARS (2.4 ml.kg.<sup>-1</sup>min<sup>-1</sup>) may be clinically meaningful.  
14 For example, in at-risk populations, relatively small magnitudes ( $\leq 1$  ml.kg.<sup>-1</sup>min<sup>-1</sup>) have been shown to  
15 significantly reduce clustered cardiometabolic risk [44]. Thus, Co-PARS was effective at improving CRF  
16 in individuals with low CRF by a clinically meaningful amount.

17 Promising improvements in vascular health were also noted in the Co-PARS group, with brachial artery  
18 FMD significantly improved compared to usual care and control arms. Although CAR was not  
19 statistically different between arms, both Co-PARS and usual care demonstrated a potentially  
20 meaningful within-arm improvement compared with no treatment, which exhibited a deterioration in  
21 vascular health. Such improvements in vascular measures may have prognostic implications. For  
22 example, a 1% increase in FMD has been suggested to reduce the future risk of CVD events by 13%  
23 [36].

24 Despite low baseline CRF, a substantial percentage of Co-PARS (73%) and usual care (71%) participants  
25 were meeting the Department of Health [45] guidelines of 150 minutes of moderate-intensity PA per

1 week. We observed a similar finding in our pilot [26] and subsequently raised the question as to the use of PA guidelines to assess eligibility for ERSs (NICE, 2014), as it appears from our data that individuals classified as “physically active” can still be very unfit and therefore can benefit from ERSs in terms of improved fitness and cardiometabolic health. A further discrepancy was noted in the lack of change in PA levels in Co-PARS, despite improved CRF. It is possible measurement issues contributed to this discrepancy. Accelerometers can measure certain types of PA such as walking, running, and stair climbing [46]. They may not, however, sufficiently identify activities typical of an ERS delivered within a fitness centre environment (e.g. cycling, resistance training, circuits, swimming). Given Co-PARS had higher (albeit non-significant) fitness centre engagement compared to usual care, it is possible PA changes occurred that were not detected by the accelerometry data. Consideration therefore needs to be given to the appropriateness of accelerometers to measure PA in ERSs. Alternative methods such as heart-rate monitors combined with self-report data may be worthy of consideration, although further work would be required to develop standardized data collection and analysis protocols (taking into account the limitations of each of these methods if used in isolation [47]). Researchers are therefore urged to consider CRF as a primary outcome in ERSs until appropriate alternative methods of measuring PA behaviour are developed. Ultimately, it is not clear why the increase in fitness occurred without a corresponding change in PA and further research is required to elucidate the relationship between PA and fitness in this population.

In addition to physiological health outcomes, we found baseline mental wellbeing to be below the national average (score of 50) in both Co-PARS (46) and usual care (49), but not the control (53) [48]. Despite no significant between-group effect for mental wellbeing, within-group changes at 12 weeks were deemed clinically meaningful for Co-PARS (5) and usual care (3) but not in the no treatment control. It is notable that the post-intervention magnitude of change observed in mental wellbeing for Co-PARS (5) was larger than that observed in a meta-analysis encompassing >23,000 participants across 13 different ERSs (3), which were comparable in nature to the usual care ERS in this study [49].

1  
2  
3 1 From the 6-month data it appeared the scheme was not effective at promoting *sustained* PA behaviour  
4  
5 2 change or mental wellbeing improvements. It must be noted, however, that the wellbeing levels were  
6  
7 3 still higher than baseline and even small magnitudes of change (1-3) may be meaningful in clinical  
8  
9 4 populations [50]. As discussed earlier, it may be that measuring PA using the methods described in  
10  
11 5 this study prevented the identification of activities typical of a fitness centre environment. This notion  
12  
13 6 is supported by the post-week-12 attendance data, which highlighted Co-PARS participants were  
14  
15 7 regularly attending the fitness centre whereas the usual care participants were not. Challenges of  
16  
17 8 maintaining sustained health outcomes post-ERSs have been highlighted elsewhere [3]. And whilst a  
18  
19 9 recent systematic review reported longer length schemes (>20 weeks) may be more effective than  
20  
21 10 shorter schemes [8], the four long ERSs (20-26 weeks) collected pre-post data only. Thus we do not  
22  
23 11 know if longer length ERSs result in enhanced health outcomes *post intervention* compared with  
24  
25 12 shorter schemes. To determine if longer length schemes are indeed more effective, *post-intervention*  
26  
27 13 follow-up data collection is required, ideally at 6 and 12 months post intervention [51].  
28  
29  
30  
31  
32

33 14 Through a phased approach we have assessed the effectiveness of Co-PARS resulting from several  
34  
35 15 years of co-production. Whilst the effects of co-production are difficult to isolate, a comparison of  
36  
37 16 results at different stages of intervention refinement suggests the phased development approach had  
38  
39 17 some positive effects. Unpublished engagement data from centre A in 2014-2015 (when the centre  
40  
41 18 was running a usual care ERS) shows that engagement improved after the introduction of Co-PARS  
42  
43 19 (42% vs 28% in 2014-2015), whereas engagement reduced in the usual care centre over the same  
44  
45 20 period (32% vs 37% in 2014-2015). Furthermore, consultation attendance for Co-PARS in the current  
46  
47 21 study was substantially higher than in our previous pilot (54% attended induction plus  $\geq 3$  behaviour  
48  
49 22 change consultations, vs 9% in the pilot [26]), which may have been a reflection of refinements made  
50  
51 23 to the intervention after the pilot (e.g. improved focus on holistic PA, improved monitoring  
52  
53 24 procedures, improved continuity of instructors). These improvements in engagement highlight the  
54  
55 25 importance of allowing time for complex interventions to develop [52], and are particularly promising  
56  
57 26 given the effectiveness of ERSs are highly dependent on participant adherence [5,21]. Furthermore,  
58  
59  
60

1 this study has demonstrated how investing in the “bottom-up” development of an intervention can  
2 lead to an effective and sustainable model. We therefore support the arguments of Rutter and  
3 colleagues [53] in that a shift in thinking is needed, instead of asking whether an intervention works  
4 to fix a problem, researchers should aim to identify if and how it contributes to reshaping a system in  
5 a favourable way. As such, we propose the co-production and implementation process may be as  
6 important as the scheme content itself.

### 7 **Methodological considerations**

8 This is the first known study to investigate the effectiveness of a co-produced PA referral scheme (Co-  
9 PARS) in comparison to usual care and a no-treatment control. Our novel approach addresses an  
10 important gap in the sport and exercise medicine literature [54], in that we employed rigorous  
11 laboratory-based instruments to measure health outcomes that can be achieved through an  
12 ecologically valid, “real-world” intervention. We observed a very high retention at 6-month follow up,  
13 which may be due in part to the fact many of the participants were retired (and therefore may have  
14 more available time). It is possible also that the high retention was facilitated by the co-production  
15 process, which involved ongoing relationships between the research and delivery teams (and  
16 therefore helped with the logistics of returning accelerometers for the co-PARS and usual care  
17 groups). Whilst this paper highlights many strengths of co-production, we do not wish to present co-  
18 production as a novel panacea [19] and it is important potential challenges and costs are considered  
19 prior to undertaking such an approach [21,22].

20 We must acknowledge some limitations of the study. Whilst there is a need for high-quality RCTs of  
21 theoretically informed approaches to PA behaviour change [3], several pragmatic reasons meant an  
22 RCT approach was not appropriate for the present study. Firstly, it was important participants could  
23 choose the most convenient fitness centre. Secondly, it was important we continued work with the  
24 same fitness centre and staff (following co-production [23] and pilot [26] phases) in order to develop  
25 the intervention to the point where it was deemed to have a worthwhile effect [52]. A pragmatic

1  
2  
3 1 research approach was therefore deemed most appropriate to evaluate Co-PARS with high ecological  
4  
5 2 validity. Pragmatic constraints (e.g. fitness centre refurbishments, staff illness) did however mean the  
6  
7 3 required sample size was not achieved, thus inferences of effectiveness need to be taken with caution.  
8  
9 4 This is particularly true for the PA data, where the relatively high variability (compared with CRF) may  
10  
11 5 have contributed to the lack of change observed in PA in this study. It is recommended future work  
12  
13 6 considers pragmatic risks and contingencies when planning recruitment and plans sufficient time to  
14  
15 7 cope with recruitment delays. For pragmatic reasons, not all outcomes were collected at 6-months  
16  
17 8 follow-up and further research is needed to collect long-term, objective health data following PA  
18  
19 9 referral schemes. Finally, it must be noted that while the trial registration appears to be retrospective  
20  
21 10 (April 6<sup>th</sup> 2018), the initial submission was several months prior to this (January 11<sup>th</sup> 2018). Final sign-  
22  
23 11 off was delayed due to capacity issues within the research team.  
24  
25  
26  
27  
28

## 29 **CONCLUSION**

30  
31  
32 13 A co-produced, theoretically-grounded PA referral scheme (Co-PARS) led to improved CRF and  
33  
34 14 vascular health in at-risk individuals when compared to usual care and no treatment. In addition,  
35  
36 15 clinically meaningful improvements in vascular health and mental wellbeing were observed at 12-  
37  
38 16 weeks in both Co-PARS and usual care, but not the no treatment control group. Of note, PA remained  
39  
40 17 unchanged at 12-weeks and 6-months follow-up. Adopting a phased approach has enabled multi-  
41  
42 18 stakeholder input and ongoing intervention refinement, resulting in an intervention that showed  
43  
44 19 promising effects on engagement and clinically meaningful improvements to participant health.  
45  
46  
47  
48  
49  
50  
51  
52  
53  
54  
55  
56  
57  
58  
59  
60

1  
2  
3 **1 Figure Legends**  
4

5 **2 Figure 1.** 'PaT Plot' describing intervention arm components.[55]  
6

7 **3 Figure 2.** Participant flow diagram within the three study arms (March 2018-January 2019).  
8  
9

10 **4**  
11  
12

13 **5**  
14  
15

16 **6**  
17  
18

19 **7**  
20  
21

22 **8**  
23  
24

25 **9**  
26  
27

28 **10**  
29  
30

31 **11**  
32  
33

34 **12**  
35  
36

37 **13**  
38  
39

40 **14**  
41  
42

43 **15**  
44  
45

46 **16**  
47  
48

49 **17**  
50  
51

52 **18**  
53  
54

55 **19**  
56  
57  
58  
59  
60

For peer review only

## References

- 1 Public Health England. Physical activity: applying All Our Health. 2019.
- Dugdill L, Graham RC, McNair F. Exercise referral: the public health panacea for physical activity promotion? A critical perspective of exercise referral schemes; their development and evaluation. *Ergonomics* 2005;**48**:1390–410. doi:10.1080/00140130500101544
- Pavey T, Taylor A, Fox K, *et al*. Effect of exercise referral schemes in primary care on physical activity and improving health outcomes: systematic review and meta-analysis. *Bmj* 2011;**343**:d6462. doi:10.1136/bmj.d6462
- Pavey T, Anokye N, Taylor A, *et al*. The clinical effectiveness and cost-effectiveness of exercise referral schemes: a systematic review and economic evaluation. *Health technology assessment (Winchester, England)* 2011;**15**:i–xii, 1–254. doi:10.3310/hta15440
- Murphy SM, Edwards RT, Williams N, *et al*. An evaluation of the effectiveness and cost effectiveness of the National Exercise Referral Scheme in Wales, UK: a randomised controlled trial of a public health policy initiative. *Journal of epidemiology and community health* 2012;**66**:745–53. doi:10.1136/jech-2011-200689
- Onerup A, Arvidsson D, Blomqvist Å, *et al*. Physical activity on prescription in accordance with the Swedish model increases physical activity: a systematic review. *Br J Sports Med* 2018;;bjsports-2018-099598. doi:10.1136/bjsports-2018-099598
- Martín-Borràs C, Giné-Garriga M, Puig-Ribera A, *et al*. A new model of exercise referral scheme in primary care: is the effect on adherence to physical activity sustainable in the long term? A 15-

- 1  
2  
3 1 month randomised controlled trial. *BMJ Open* 2018;**8**:e017211. doi:10.1136/bmjopen-2017-017211  
4  
5 2  
6  
7 3 8 Rowley N, Mann S, Steele J, *et al.* The effects of exercise referral schemes in the United Kingdom in  
8 those with cardiovascular, mental health, and musculoskeletal disorders: a preliminary systematic  
9  
10 4  
11  
12 5 review. *BMC Public Health* 2018;**18**:949. doi:10.1186/s12889-018-5868-9  
13  
14 6  
15  
16 7 9 Prior F, Coffey M, Robins A, *et al.* Long-Term Health Outcomes Associated With an Exercise  
17 Referral Scheme: An Observational Longitudinal Follow-Up Study. *Journal of Physical Activity and*  
18  
19 8  
20 9  
21 9  
22  
23 10  
24  
25 11 10 Taylor F, Huffman MD, Macedo A, *et al.* Statins for the primary prevention of cardiovascular  
26 disease. *Cochrane Db Syst Rev* 2013;**1**:CD004816. doi:10.1002/14651858.cd004816.pub5  
27  
28 12  
29  
30 13  
31  
32 14 11 Wijndaele K, Sharp SJ, Wareham NJ, *et al.* Mortality Risk Reductions from Substituting Screen  
33 Time by Discretionary Activities. *Med Sci Sport Exer* 2017;**49**:1111–9.  
34  
35 15  
36 16  
37 16  
38  
39 17  
40  
41 18 12 Craike M, Wiesner G, Enticott J, *et al.* Equity of a government subsidised exercise referral scheme:  
42 A population study. *Social Science & Medicine* Published Online First: 2018.  
43  
44 19  
45 20  
46 20  
47  
48 21  
49  
50 22 13 Craig A, Dinan S, Smith A, *et al.* Exercise Referral Systems: A National Quality Assurance  
51 Framework. *Department of Health: London* Published Online First: 2001.discovery.ucl.ac.uk  
52  
53 23  
54  
55 24  
56  
57 25 14 Pavey T, Taylor A, Hillsdon M, *et al.* Levels and predictors of exercise referral scheme uptake and  
58 adherence: a systematic review. *J Epidemiol Commun H* 2012;**66**:737–44. doi:10.1136/jech-2011-  
59  
60



1  
2  
3  
4  
5  
6  
7  
8  
9  
10  
11  
12  
13  
14  
15  
16  
17  
18  
19  
20  
21  
22  
23  
24  
25  
26  
27  
28  
29  
30  
31  
32  
33  
34  
35  
36  
37  
38  
39  
40  
41  
42  
43  
44  
45  
46  
47  
48  
49  
50  
51  
52  
53  
54  
55  
56  
57  
58  
59  
60

1 200354

2

3 15 Littlecott HJ, Moore GF, Moore L, *et al.* Psychosocial mediators of change in physical activity in  
4 the Welsh national exercise referral scheme: secondary analysis of a randomised controlled trial.  
5 *International Journal of Behavioral Nutrition and Physical Activity* 2014;**11**:1–11.

6 doi:10.1186/s12966-014-0109-9

7

8 16 Hanson CL, Oliver EJ, Dodd-Reynolds CJ, *et al.* How do participant experiences and characteristics  
9 influence engagement in exercise referral? A qualitative longitudinal study of a scheme in  
10 Northumberland, UK. *Bmj Open* 2019;**9**:e024370. doi:10.1136/bmjopen-2018-024370

11

12 17 Sowden S, Raine R. Running along parallel lines: how political reality impedes the evaluation of  
13 public health interventions. A case study of exercise referral schemes in England. *Journal of  
14 epidemiology and community health* 2008;**62**:835–841. doi:10.1136/jech.2007.069781

15

16 18 Duda JL, Williams GC, Ntoumanis N, *et al.* Effects of a standard provision versus an autonomy  
17 supportive exercise referral programme on physical activity, quality of life and well-being indicators:  
18 a cluster randomised controlled trial. *The international journal of behavioral nutrition and physical  
19 activity* 2014;**11**:10. doi:10.1186/1479-5868-11-10

20

21 19 Ostrom E. Crossing the great divide: Coproduction, synergy, and development. *World  
22 Development* 1996;**24**:1073–87. doi:10.1016/0305-750x(96)00023-x

23

24 20 Clarke D, Jones F, Harris R, *et al.* What outcomes are associated with developing and  
25 implementing co-produced interventions in acute healthcare settings? A rapid evidence synthesis.  
26 *BMJ open* 2017;**7**:e014650. doi:10.1136/bmjopen-2016-014650

- 1  
2  
3 1  
4  
5 2 21 Farrance C, Tsofliou F, Clark C. Adherence to community based group exercise interventions for  
6  
7 3 older people: A mixed-methods systematic review. *Preventive medicine* 2016;**87**:155–66.  
8  
9 4 doi:10.1016/j.ypmed.2016.02.037  
10  
11 5  
12  
13 6 22 Rycroft-Malone J, Burton CR, Bucknall T, *et al.* Collaboration and Co-Production of Knowledge in  
14  
15 7 Healthcare: Opportunities and Challenges. *International journal of health policy and management*  
16  
17 8 2016;**5**:221–3. doi:10.15171/ijhpm.2016.08  
18  
19 9  
20  
21 10 23 Buckley B, Thijssen D, Murphy R, *et al.* Making a move in exercise referral: co-development of a  
22  
23 11 physical activity referral scheme. *Journal of Public Health* Published Online First: 2018.  
24  
25 12 doi:10.1093/pubmed/fdy072  
26  
27 13  
28  
29 14 24 The English indices of deprivation 2019. 2019.  
30  
31 15  
32  
33 16 25 Carey G, Crammond B, Leeuw E. Towards health equity: a framework for the application of  
34  
35 17 proportionate universalism. *Int J Equity Health* 2015;**14**:81. doi:10.1186/s12939-015-0207-6  
36  
37 18  
38  
39 19 26 Buckley BJ, Thijssen DH, Murphy RC, *et al.* Preliminary effects and acceptability of a co-produced  
40  
41 20 physical activity referral intervention. *Health Educ J* 2019;:001789691985332.  
42  
43 21 doi:10.1177/0017896919853322  
44  
45 22  
46  
47 23 27 Department of Health & Social Care. UK Chief Medical Officers' Physical Activity Guidelines. 2019.  
48  
49 24  
50  
51 25 28 Ryan R, Deci E. Self-determination theory and the facilitation of intrinsic motivation, social  
52  
53 26 development, and well-being. *The American psychologist* 2000;**55**:68–78.  
54  
55  
56  
57  
58  
59  
60

1  
2  
3  
4  
5  
6  
7  
8  
9  
10  
11  
12  
13  
14  
15  
16  
17  
18  
19  
20  
21  
22  
23  
24  
25  
26  
27  
28  
29  
30  
31  
32  
33  
34  
35  
36  
37  
38  
39  
40  
41  
42  
43  
44  
45  
46  
47  
48  
49  
50  
51  
52  
53  
54  
55  
56  
57  
58  
59  
601  
2  
3  
4  
5  
6  
7  
8  
9  
10  
11  
12  
13  
14  
15  
16  
17  
18  
19  
20  
21  
22  
23  
24  
25  
26  
27  
28  
29  
30  
31  
32  
33  
34  
35  
36  
37  
38  
39  
40  
41  
42  
43  
44  
45  
46  
47  
48  
49  
50  
51  
52  
53  
54  
55  
56  
57  
58  
59  
60

29 Astrand I. Aerobic work capacity in men and women with special reference to age. *Acta physiologica Scandinavica Supplementum* 1960;**49**:1–92.

30 Kelly LA, McMillan DG, Anderson A, *et al.* Validity of actigraphs uniaxial and triaxial accelerometers for assessment of physical activity in adults in laboratory conditions. *BMC Medical Physics* 2013;**13**:1–7. doi:10.1186/1756-6649-13-5

31 Hees VT, Gorzelniak L, Leon E, *et al.* Separating movement and gravity components in an acceleration signal and implications for the assessment of human daily physical activity. *PLoS one* 2013;**8**:e61691. doi:10.1371/journal.pone.0061691

32 Matthews CE, Hagströmer M, Pober DM, *et al.* Best Practices for Using Physical Activity Monitors in Population-Based Research. *Medicine & Science in Sports & Exercise* 2012;**44**:S68. doi:10.1249/MSS.0b013e3182399e5b

33 Bakrania K, Yates T, Rowlands AV, *et al.* Intensity Thresholds on Raw Acceleration Data: Euclidean Norm Minus One (ENMO) and Mean Amplitude Deviation (MAD) Approaches. *PLOS ONE* 2016;**11**:e0164045. doi:10.1371/journal.pone.0164045

34 Hilded M, Hees Vt, Hansen B, *et al.* Age Group Comparability of Raw Accelerometer Output from Wrist- and Hip-Worn Monitors. *Medicine & Science in Sports & Exercise* 2014;**46**:1816. doi:10.1249/mss.0000000000000289

35 Buckley B, Watson PM, Murphy RC, *et al.* Carotid artery function is restored in subjects with elevated cardiovascular disease risk following a 12-week physical activity intervention. *Canadian*

- 1  
2  
3 1 *Journal of Cardiology* Published Online First: 2018. doi:10.1016/j.cjca.2018.10.015  
4  
5 2  
6  
7 3 36 Inaba Y, Chen JA, Bergmann SR. Prediction of future cardiovascular outcomes by flow-mediated  
8  
9 4 vasodilatation of brachial artery: a meta-analysis. *The international journal of cardiovascular imaging*  
10  
11 5 2010;**26**:631–40. doi:10.1007/s10554-010-9616-1  
12  
13 6  
14  
15 7 37 van Mil A, Pouwels S, Wilbrink J, *et al.* Carotid Artery Reactivity Predicts Events in Peripheral  
16  
17 8 Arterial Disease Patients. *Annals of Surgery* 2017. doi:10.1097/SLA.0000000000002558  
18  
19 9  
20  
21 10 38 Ashwell M, Gunn P, Gibson S. Waist-to-height ratio is a better screening tool than waist  
22  
23 11 circumference and BMI for adult cardiometabolic risk factors: systematic review and meta-analysis.  
24  
25 12 *Obesity reviews : an official journal of the International Association for the Study of Obesity*  
26  
27 13 2012;**13**:275–86. doi:10.1111/j.1467-789X.2011.00952.x  
28  
29 14  
30  
31 15 39 Paluska SA, Schwenk TL. Physical Activity and Mental Health. *Sports Med* 2000;**29**:167–80.  
32  
33 16 doi:10.2165/00007256-200029030-00003  
34  
35 17  
36  
37 18 40 Barnett K, Mercer SW, Norbury M, *et al.* Epidemiology of multimorbidity and implications for  
38  
39 19 health care, research, and medical education: a cross-sectional study. *Lancet* 2012;**380**:37–43.  
40  
41 20 doi:10.1016/s0140-6736(12)60240-2  
42  
43 21  
44  
45 22 41 Tennant R, Hiller L, Fishwick R, *et al.* The Warwick-Edinburgh Mental Well-being Scale  
46  
47 23 (WEMWBS): development and UK validation. *Health Qual Life Out* 2007;**5**:1–13. doi:10.1186/1477-  
48  
49 24 7525-5-63  
50  
51 25  
52  
53 26 42 Clausen J, Marott JL, Holtermann A, *et al.* Midlife Cardiorespiratory Fitness and the Long-Term  
54  
55  
56  
57  
58  
59  
60

- 1  
2  
3 1 Risk of Mortality 46 Years of Follow-Up. *J Am Coll Cardiol* 2018;**72**:987–95.  
4  
5 2 doi:10.1016/j.jacc.2018.06.045  
6  
7 3  
8  
9 4 43 Kodama S, Saito K, Tanaka S, *et al.* Cardiorespiratory fitness as a quantitative predictor of all-  
10 cause mortality and cardiovascular events in healthy men and women: a meta-analysis. *JAMA*  
11 5  
12 2009;**301**:2024–35. doi:10.1001/jama.2009.681  
13 6  
14 7  
15 8 44 Simmons R, Griffin S, Steele R, *et al.* Increasing overall physical activity and aerobic fitness is  
16 9 associated with improvements in metabolic risk: cohort analysis of the ProActive trial. *Diabetologia*  
17 10  
18 2008;**51**:787–94. doi:10.1007/s00125-008-0949-4  
19 11  
20 12 45 Department of Health. Start Active, Stay Active – A report on physical activity for health from the  
21 13 four home countries’ Chief Medical Officers. *London: Departmet of Health* 2011.  
22 14  
23 15 46 Berlin JE, Storti KL, Brach JS. Using Activity Monitors to Measure Physical Activity in Free-Living  
24 16 Conditions. *Physical Therapy* 2006;**86**:1137–45. doi:10.1093/ptj/86.8.1137  
25 17  
26 18 47 Strath SJ, Kaminsky LA, Ainsworth BE, *et al.* Guide to the assessment of physical activity: Clinical  
27 19 and research applications: a scientific statement from the American Heart Association. *Circulation*  
28 20  
29 2013;**128**:2259–79. doi:10.1161/01.cir.0000435708.67487.da  
30 21  
31 22 48 Morris S, Earl K. Health Survey for England 2016 Well-being and mental health. *Health and Social*  
32 23 *Care Information Centre* 2017.  
33 24  
34 25 49 Wade M, Mann S, Copeland RJ, *et al.* The effect of exercise referral schemes upon health and  
35 26 wellbeing: Initial observational insights using individual patient data meta-analysis from The National  
36  
37  
38  
39  
40  
41  
42  
43  
44  
45  
46  
47  
48  
49  
50  
51  
52  
53  
54  
55  
56  
57  
58  
59  
60

1  
2  
3 1 Referral database. doi:10.31236/osf.io/yebmr  
4

5 2  
6

7 3 50 Shah N, Cader M, Andrews WP, *et al.* Responsiveness of the Short Warwick Edinburgh Mental  
8 Well-Being Scale (SWEMWBS): evaluation a clinical sample. *Health and Quality of Life Outcomes*  
9 4 2018;**16**:239. doi:10.1186/s12955-018-1060-2  
10 5  
11 6

12 7 51 Cavill N, Roberts K, Rutter H. Standard evaluation framework for physical activity interventions.  
13 8 Oxford: National Obesity Observatory 2012.  
14 9

15 10 52 Craig P, Dieppe P, Macintyre S, *et al.* Developing and evaluating complex interventions: the new  
16 11 Medical Research Council guidance. *BMJ* 2008;**337**:a1655. doi:10.1136/bmj.a1655  
17 12

18 13 53 Rutter H, Savona N, Glonti K, *et al.* The need for a complex systems model of evidence for public  
19 14 health. *Lancet* 2017;**17**:1267–9. doi:10.1016/S0140-6736  
20 15

21 16 54 Beedie C, Mann S, Jimenez A, *et al.* Death by effectiveness: exercise as medicine caught in the  
22 17 efficacy trap! *Brit J Sport Med* 2015;**0**:1–2. doi:10.1136/bjsports-2014-094389  
23 18

24 19 55 Perera R, Heneghan C, Yudkin P. Graphical method for depicting randomised trials of complex  
25 20 interventions. *BMJ* 2007;**334**:127. doi:10.1136/bmj.39045.396817.68  
26 21

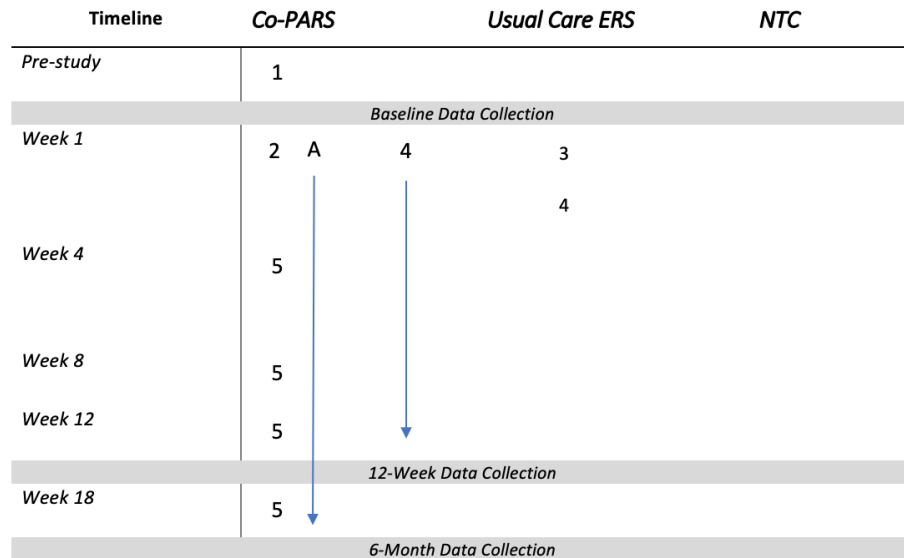

**Baseline and 12-week measures** – Cardiorespiratory Fitness (CRF), Warwick Edinburgh Mental Wellbeing Scale (WEMWBS), Accelerometer Derived PA, Body Mass Index (BMI), Waist-To-Height Ratio, Blood Pressure, Flow-Mediated Dilation (FMD), Carotid Artery Reactivity (CAR).

**6-month measures** – WEMWBS and accelerometer derived PA.

| +                                                                                            |                                                                                                                                                                                                                                                                                                                                                                                                                                                                                                  |
|----------------------------------------------------------------------------------------------|--------------------------------------------------------------------------------------------------------------------------------------------------------------------------------------------------------------------------------------------------------------------------------------------------------------------------------------------------------------------------------------------------------------------------------------------------------------------------------------------------|
| 1                                                                                            | Training delivered to Exercise Referral Practitioners in PA behaviour change by a trained HCPC-registered Psychologist [last author].<br><br>Training included: 1. Needs analysis (observation of current practices); 2. Education (Full day workshop); 3. Behaviour change support (one-to-one sessions over 4 weeks); 5. Ongoing support as required.                                                                                                                                          |
| 2                                                                                            | 1-hour induction underpinned by Self-Determination Theory [24] to foster participant autonomy, competence, and relatedness. The focus was on getting to know the participant, discussing participant goals and agreeing a programme of activities tailored to their needs. Participant self-report PA logbook was provided.                                                                                                                                                                      |
| 3                                                                                            | Usual care exercise referral induction focussed on prescribing an individualised 12-week exercise programme appropriate for the specific health condition.                                                                                                                                                                                                                                                                                                                                       |
| 4                                                                                            | 12-week subsidised access to a fitness centre (swimming pool, gymnasium, group classes etc.).                                                                                                                                                                                                                                                                                                                                                                                                    |
| 5                                                                                            | 30-minute behaviour change consultation focussed on fostering participant autonomy, competence, and relatedness with the aim of enhancing long-term PA behaviour change. Included review of participant self-report PA logbook, discussion of progress towards goals and revision of action plans as appropriate. During the week 8, week 12 and week 18 consultations, participants were supported to make plans for continuing PA after the subsidised 12-week fitness centre access finished. |
| A                                                                                            | Participant self-report PA logbook. An A5 booklet in which participants could write down their action plans and record the PA they engaged in (for 18 weeks). There was space for participants to record how they were feeling and any challenges they were facing. The logbook also provided information about PA benefits, guidelines and testimonials from previous participants.                                                                                                             |
| Numbers (1-5) represent intervention activities. Letters (A) represent an intervention tool. |                                                                                                                                                                                                                                                                                                                                                                                                                                                                                                  |

Figure 1. 'PaT Plot' describing intervention arm components.[25]

**Co-produced PA referral scheme**  
Contacted (n= 53)

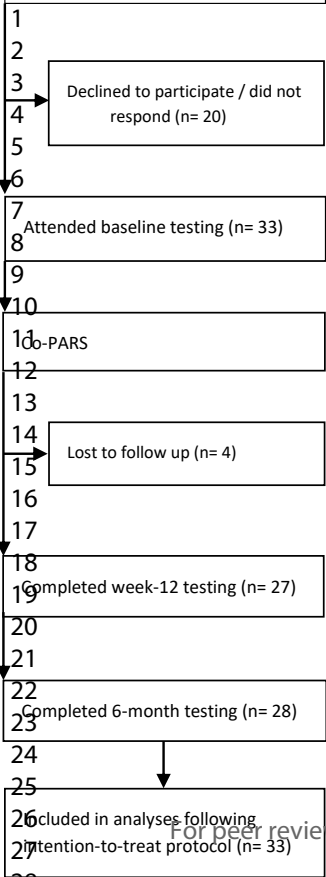

**BMJ Open  
Usual care exercise referral scheme**  
Contacted (n= 27)

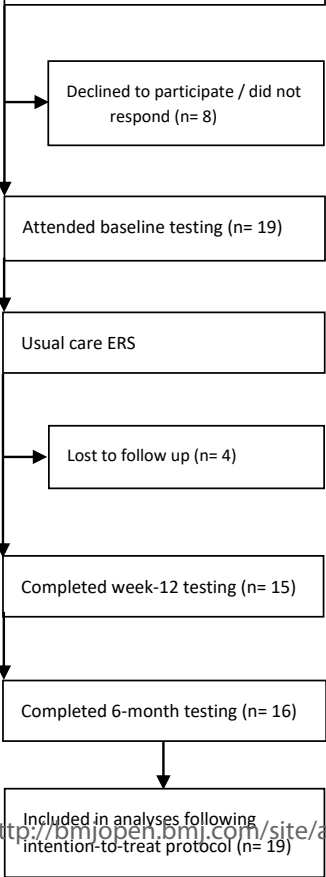

**No-treatment control**  
Contacted (n= 20)

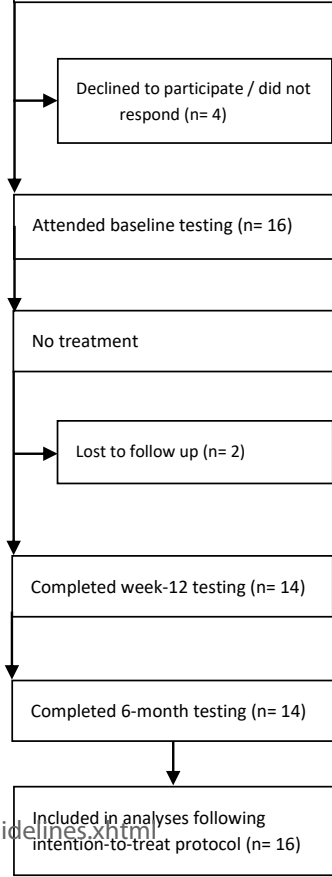



# TREND Statement Checklist

| Paper Section/Topic                                                 | Item No. | Descriptor                                                                                                                                                                                                                              | Reported? |      |
|---------------------------------------------------------------------|----------|-----------------------------------------------------------------------------------------------------------------------------------------------------------------------------------------------------------------------------------------|-----------|------|
|                                                                     |          |                                                                                                                                                                                                                                         | ✓         | Pg # |
| <b>TITLE and ABSTRACT</b>                                           |          |                                                                                                                                                                                                                                         |           |      |
| Title and Abstract                                                  | 1        | • Information on how units were allocated to interventions                                                                                                                                                                              | ✓         | 1,2  |
|                                                                     |          | • Structured abstract recommended                                                                                                                                                                                                       | ✓         | 2    |
|                                                                     |          | • Information on target population or study sample                                                                                                                                                                                      | ✓         | 2    |
| <b>INTRODUCTION</b>                                                 |          |                                                                                                                                                                                                                                         |           |      |
| Background                                                          | 2        | • Scientific background and explanation of rationale                                                                                                                                                                                    | ✓         | 4-5  |
|                                                                     |          | • Theories used in designing behavioral interventions                                                                                                                                                                                   | ✓         | 6    |
| <b>METHODS</b>                                                      |          |                                                                                                                                                                                                                                         |           |      |
| Participants                                                        | 3        | • Eligibility criteria for participants, including criteria at different levels in recruitment/sampling plan (e.g., cities, clinics, subjects)                                                                                          | ✓         | 5-6  |
|                                                                     |          | • Method of recruitment (e.g., referral, self-selection), including the sampling method if a systematic sampling plan was implemented                                                                                                   | ✓         | 5-6  |
|                                                                     |          | • Recruitment setting                                                                                                                                                                                                                   | ✓         | 6,7  |
|                                                                     |          | • Settings and locations where the data were collected                                                                                                                                                                                  | ✓         | 5-6  |
| Interventions                                                       | 4        | • Details of the interventions intended for each study condition and how and when they were actually administered, specifically including:                                                                                              | ✓         | 6-8  |
|                                                                     |          | ○ Content: what was given?                                                                                                                                                                                                              | ✓         | 6-8  |
|                                                                     |          | ○ Delivery method: how was the content given?                                                                                                                                                                                           | ✓         | 6-8  |
|                                                                     |          | ○ Unit of delivery: how were subjects grouped during delivery?                                                                                                                                                                          | ✓         | 6-8  |
|                                                                     |          | ○ Deliverer: who delivered the intervention?                                                                                                                                                                                            | ✓         | 6-8  |
|                                                                     |          | ○ Setting: where was the intervention delivered?                                                                                                                                                                                        | ✓         | 6-8  |
|                                                                     |          | ○ Exposure quantity and duration: how many sessions or episodes or events were intended to be delivered? How long were they intended to last?                                                                                           | ✓         | 6-8  |
|                                                                     |          | ○ Time span: how long was it intended to take to deliver the intervention to each unit?                                                                                                                                                 | ✓         | 6-8  |
| ○ Activities to increase compliance or adherence (e.g., incentives) |          | N/A                                                                                                                                                                                                                                     |           |      |
| Objectives                                                          | 5        | • Specific objectives and hypotheses                                                                                                                                                                                                    | ✓         | 5    |
| Outcomes                                                            | 6        | • Clearly defined primary and secondary outcome measures                                                                                                                                                                                | ✓         | 7-8  |
|                                                                     |          | • Methods used to collect data and any methods used to enhance the quality of measurements                                                                                                                                              | ✓         | 7-8  |
|                                                                     |          | • Information on validated instruments such as psychometric and biometric properties                                                                                                                                                    |           | N/A  |
| Sample size                                                         | 7        | • How sample size was determined and, when applicable, explanation of any interim analyses and stopping rules                                                                                                                           | ✓         | 8    |
| Assignment method                                                   | 8        | • Unit of assignment (the unit being assigned to study condition, e.g., individual, group, community)                                                                                                                                   |           | N/A  |
|                                                                     |          | • Method used to assign units to study conditions, including details of any restriction (e.g., blocking, stratification, minimization)                                                                                                  |           | N/A  |
|                                                                     |          | • Inclusion of aspects employed to help minimize potential bias induced due to non-randomization (e.g., matching)                                                                                                                       |           | N/A  |
| Blinding (masking)                                                  | 9        | • Whether or not participants, those administering the interventions, and those assessing the outcomes were blinded to study condition assignment; if so, statement regarding how the blinding was accomplished and how it was assessed |           | N/A  |
| Unit of Analysis                                                    | 10       | • Description of the smallest unit that is being analysed to assess intervention effects (e.g., individual, group, or community)                                                                                                        | ✓         | 8-9  |
|                                                                     |          | • If the unit of analysis differs from the unit of assignment, the analytical method used to account for this (e.g., adjusting the standard error estimates by the design effect or using multilevel analysis)                          |           | N/A  |
| Statistical methods                                                 | 11       | • Statistical methods used to compare study groups for primary methods outcome(s), including complex methods for correlated data                                                                                                        | ✓         | 8-9  |
|                                                                     |          | • Statistical methods used for additional analyses, such as subgroup analyses and adjusted analysis                                                                                                                                     | ✓         | 8-9  |
|                                                                     |          | • Methods for imputing missing data, if used                                                                                                                                                                                            |           | N/A  |

# TREND Statement Checklist

|                         |    |                                                                                                                                                                                                                                                                                                                                                                                                                                                                                                                                                                                                                                                                                                                                                                                                                                                                                                                                                                                                                                                                                     |   |       |
|-------------------------|----|-------------------------------------------------------------------------------------------------------------------------------------------------------------------------------------------------------------------------------------------------------------------------------------------------------------------------------------------------------------------------------------------------------------------------------------------------------------------------------------------------------------------------------------------------------------------------------------------------------------------------------------------------------------------------------------------------------------------------------------------------------------------------------------------------------------------------------------------------------------------------------------------------------------------------------------------------------------------------------------------------------------------------------------------------------------------------------------|---|-------|
|                         |    | <ul style="list-style-type: none"> <li>Statistical software or programs used</li> </ul>                                                                                                                                                                                                                                                                                                                                                                                                                                                                                                                                                                                                                                                                                                                                                                                                                                                                                                                                                                                             | ✓ | 8-9   |
| <b>RESULTS</b>          |    |                                                                                                                                                                                                                                                                                                                                                                                                                                                                                                                                                                                                                                                                                                                                                                                                                                                                                                                                                                                                                                                                                     |   |       |
| Participant flow        | 12 | <ul style="list-style-type: none"> <li>Flow of participants through each stage of the study: enrollment, assignment, allocation and intervention exposure, follow-up, analysis (a diagram is strongly recommended)               <ul style="list-style-type: none"> <li>Enrollment: the numbers of participants screened for eligibility, found to be eligible or not eligible, declined to be enrolled, and enrolled in the study</li> <li>Assignment: the numbers of participants assigned to a study condition</li> <li>Allocation and intervention exposure: the number of participants assigned to each study condition and the number of participants who received each intervention</li> <li>Follow-up: the number of participants who completed the follow-up or did not complete the follow-up (i.e., lost to follow-up), by study condition</li> <li>Analysis: the number of participants included in or excluded from the main analysis, by study condition</li> </ul> </li> <li>Description of protocol deviations from study as planned, along with reasons</li> </ul> | ✓ | 9     |
| Recruitment             | 13 | <ul style="list-style-type: none"> <li>Dates defining the periods of recruitment and follow-up</li> </ul>                                                                                                                                                                                                                                                                                                                                                                                                                                                                                                                                                                                                                                                                                                                                                                                                                                                                                                                                                                           | ✓ | 9     |
| Baseline data           | 14 | <ul style="list-style-type: none"> <li>Baseline demographic and clinical characteristics of participants in each study condition</li> <li>Baseline characteristics for each study condition relevant to specific disease prevention research</li> <li>Baseline comparisons of those lost to follow-up and those retained, overall and by study condition</li> <li>Comparison between study population at baseline and target population of interest</li> </ul>                                                                                                                                                                                                                                                                                                                                                                                                                                                                                                                                                                                                                      | ✓ | 10    |
| Baseline equivalence    | 15 | <ul style="list-style-type: none"> <li>Data on study group equivalence at baseline and statistical methods used to control for baseline differences</li> </ul>                                                                                                                                                                                                                                                                                                                                                                                                                                                                                                                                                                                                                                                                                                                                                                                                                                                                                                                      |   | N/A   |
| Numbers analyzed        | 16 | <ul style="list-style-type: none"> <li>Number of participants (denominator) included in each analysis for each study condition, particularly when the denominators change for different outcomes; statement of the results in absolute numbers when feasible</li> <li>Indication of whether the analysis strategy was "intention to treat" or, if not, description of how non-compliers were treated in the analyses</li> </ul>                                                                                                                                                                                                                                                                                                                                                                                                                                                                                                                                                                                                                                                     | ✓ | 10-13 |
| Outcomes and estimation | 17 | <ul style="list-style-type: none"> <li>For each primary and secondary outcome, a summary of results for each estimation study condition, and the estimated effect size and a confidence interval to indicate the precision</li> <li>Inclusion of null and negative findings</li> <li>Inclusion of results from testing pre-specified causal pathways through which the intervention was intended to operate, if any</li> </ul>                                                                                                                                                                                                                                                                                                                                                                                                                                                                                                                                                                                                                                                      | ✓ | 10    |
| Ancillary analyses      | 18 | <ul style="list-style-type: none"> <li>Summary of other analyses performed, including subgroup or restricted analyses, indicating which are pre-specified or exploratory</li> </ul>                                                                                                                                                                                                                                                                                                                                                                                                                                                                                                                                                                                                                                                                                                                                                                                                                                                                                                 |   | N/A   |
| Adverse events          | 19 | <ul style="list-style-type: none"> <li>Summary of all important adverse events or unintended effects in each study condition (including summary measures, effect size estimates, and confidence intervals)</li> </ul>                                                                                                                                                                                                                                                                                                                                                                                                                                                                                                                                                                                                                                                                                                                                                                                                                                                               | ✓ | 10    |
| <b>DISCUSSION</b>       |    |                                                                                                                                                                                                                                                                                                                                                                                                                                                                                                                                                                                                                                                                                                                                                                                                                                                                                                                                                                                                                                                                                     |   |       |
| Interpretation          | 20 | <ul style="list-style-type: none"> <li>Interpretation of the results, taking into account study hypotheses, sources of potential bias, imprecision of measures, multiplicative analyses, and other limitations or weaknesses of the study</li> <li>Discussion of results taking into account the mechanism by which the intervention was intended to work (causal pathways) or alternative mechanisms or explanations</li> <li>Discussion of the success of and barriers to implementing the intervention, fidelity of implementation</li> <li>Discussion of research, programmatic, or policy implications</li> </ul>                                                                                                                                                                                                                                                                                                                                                                                                                                                              | ✓ | 14-17 |
| Generalizability        | 21 | <ul style="list-style-type: none"> <li>Generalizability (external validity) of the trial findings, taking into account the study population, the characteristics of the intervention, length of follow-up, incentives, compliance rates, specific sites/settings involved in the study, and other contextual issues</li> </ul>                                                                                                                                                                                                                                                                                                                                                                                                                                                                                                                                                                                                                                                                                                                                                      | ✓ | 14-17 |
| Overall evidence        | 22 | <ul style="list-style-type: none"> <li>General interpretation of the results in the context of current evidence and current theory</li> </ul>                                                                                                                                                                                                                                                                                                                                                                                                                                                                                                                                                                                                                                                                                                                                                                                                                                                                                                                                       | ✓ | 14-17 |

From: Des Jarlais, D. C., Lyles, C., Crepaz, N., & the Trend Group (2004). Improving the reporting quality of nonrandomized evaluations of behavioral and public health interventions: The TREND statement. *American Journal of Public Health*, 94, 361-366. For more information, visit: <http://www.cdc.gov/trendstatement/>

# BMJ Open

## Pragmatic evaluation of a co-produced physical activity referral scheme: A quasi-experimental study

|                                 |                                                                                                                                                                                                                                                                                                                                                                                                                                                                                                                                                                                                                                                                                                                        |
|---------------------------------|------------------------------------------------------------------------------------------------------------------------------------------------------------------------------------------------------------------------------------------------------------------------------------------------------------------------------------------------------------------------------------------------------------------------------------------------------------------------------------------------------------------------------------------------------------------------------------------------------------------------------------------------------------------------------------------------------------------------|
| Journal:                        | <i>BMJ Open</i>                                                                                                                                                                                                                                                                                                                                                                                                                                                                                                                                                                                                                                                                                                        |
| Manuscript ID                   | bmjopen-2019-034580.R2                                                                                                                                                                                                                                                                                                                                                                                                                                                                                                                                                                                                                                                                                                 |
| Article Type:                   | Original research                                                                                                                                                                                                                                                                                                                                                                                                                                                                                                                                                                                                                                                                                                      |
| Date Submitted by the Author:   | 20-May-2020                                                                                                                                                                                                                                                                                                                                                                                                                                                                                                                                                                                                                                                                                                            |
| Complete List of Authors:       | Buckley, Benjamin; Liverpool John Moores University, Research Institute for Sport and Exercise Sciences<br>Thijssen, Dick; Liverpool John Moores University<br>Murphy, Rebecca; Liverpool John Moores University, Research Institute for Sport and Exercise Sciences<br>Graves, Lee; Liverpool John Moores University,<br>Cochrane, Madeleine; Liverpool John Moores University, Physical Activity Exchange<br>Gillison, Fiona; University of Bath, Department for Health<br>Crone, Diane; Cardiff Metropolitan University<br>Wilson, Philip; Brock University<br>Whyte, Greg; Liverpool John Moores University<br>Watson, Paula; Liverpool John Moores University, Research Institute for Sport and Exercise Sciences |
| <b>Primary Subject Heading</b>: | Sports and exercise medicine                                                                                                                                                                                                                                                                                                                                                                                                                                                                                                                                                                                                                                                                                           |
| Secondary Subject Heading:      | Public health, Cardiovascular medicine, Health services research                                                                                                                                                                                                                                                                                                                                                                                                                                                                                                                                                                                                                                                       |
| Keywords:                       | Cardiovascular Health, Self-Determination Theory, Exercise Referral, Behaviour Change, Translational Research                                                                                                                                                                                                                                                                                                                                                                                                                                                                                                                                                                                                          |
|                                 |                                                                                                                                                                                                                                                                                                                                                                                                                                                                                                                                                                                                                                                                                                                        |

SCHOLARONE™  
Manuscripts



I, the Submitting Author has the right to grant and does grant on behalf of all authors of the Work (as defined in the below author licence), an exclusive licence and/or a non-exclusive licence for contributions from authors who are: i) UK Crown employees; ii) where BMJ has agreed a CC-BY licence shall apply, and/or iii) in accordance with the terms applicable for US Federal Government officers or employees acting as part of their official duties; on a worldwide, perpetual, irrevocable, royalty-free basis to BMJ Publishing Group Ltd ("BMJ") its licensees and where the relevant Journal is co-owned by BMJ to the co-owners of the Journal, to publish the Work in this journal and any other BMJ products and to exploit all rights, as set out in our [licence](#).

The Submitting Author accepts and understands that any supply made under these terms is made by BMJ to the Submitting Author unless you are acting as an employee on behalf of your employer or a postgraduate student of an affiliated institution which is paying any applicable article publishing charge ("APC") for Open Access articles. Where the Submitting Author wishes to make the Work available on an Open Access basis (and intends to pay the relevant APC), the terms of reuse of such Open Access shall be governed by a Creative Commons licence – details of these licences and which [Creative Commons](#) licence will apply to this Work are set out in our licence referred to above.

Other than as permitted in any relevant BMJ Author's Self Archiving Policies, I confirm this Work has not been accepted for publication elsewhere, is not being considered for publication elsewhere and does not duplicate material already published. I confirm all authors consent to publication of this Work and authorise the granting of this licence.

1  
2  
3 1 **Pragmatic evaluation of a co-produced physical activity referral scheme: A quasi-experimental**  
4  
5  
6 2 **study**  
7  
8  
9

10 3 Benjamin J. R. Buckley<sup>a</sup>, Dick H. J. Thijssen<sup>a,e</sup>, Rebecca C. Murphy<sup>a</sup>, Lee E. F. Graves<sup>a</sup>,  
11 4 Madeleine Cochrane<sup>a</sup>, Fiona Gillison<sup>b</sup>, Diane Crone<sup>c</sup>, Philip M. Wilson<sup>d</sup>, Greg Whyte<sup>a</sup> and  
12 5 Paula M. Watson<sup>a</sup>  
13  
14  
15

16 6  
17 7 <sup>a</sup> Research Institute for Sport and Exercise Sciences, Liverpool John Moores University,  
18 8 Liverpool, UK

19 9 <sup>b</sup> Department for Health, University of Bath, Bath, UK

20 10 <sup>c</sup> Cardiff School of Sport and Health Sciences, Cardiff Metropolitan University, UK

21 11 <sup>d</sup> Behavioural Health Sciences Research Lab, Department of Kinesiology, Brock University,  
22 12 Ontario, Canada

23 13 <sup>e</sup> Radboud Institute for Health Sciences, Department of Physiology, Radboud University  
24 14 Medical Center, Nijmegen, Netherlands  
25  
26

27 15  
28 16  
29 17 Correspondence to Dr Ben Buckley: B.J.Buckley@ljmu.ac.uk  
30  
31  
32  
33

34 18  
35 19 Contributorship Statement

36 20 BJRБ contributed to the study design, data collection, data analysis, and preparation of the final  
37 21 document. PMW, DHJT, and RCM contributed to the study design, data analysis, and preparation of  
38 22 the final document. MC contributed to the data collection and approved the final version. LEFG, FG,  
39 23 DC, PW, and GW intellectually contributed to this paper and approved the final version.  
40  
41  
42  
43  
44  
45  
46  
47  
48  
49  
50  
51  
52  
53  
54  
55  
56  
57  
58  
59  
60

1  
2  
3 1  
4  
5 2

**Objectives.** UK exercise referral schemes (ERSs) have been criticised for focusing too much on exercise prescription and not enough on sustainable physical activity (PA) behaviour change. Previously, a theoretically-grounded intervention (Co-PARS) was co-produced to support long-term PA behaviour change in individuals with health conditions. The purpose of this study was to investigate the effectiveness of Co-PARS compared to a usual care ERS and no treatment for increasing cardiorespiratory fitness.

8 **Design.** A three-arm quasi-experimental trial.

9 **Setting.** Two leisure centres providing a) Co-PARS, b) usual exercise referral care, and one no-treatment control.

11 **Participants.** 68 adults with lifestyle-related health conditions (e.g. cardiovascular, diabetes, depression) were recruited to Co-PARS, usual care, or no treatment.

13 **Intervention.** 16-weeks of physical activity behaviour change support delivered at 4, 8, 12, and 18 weeks, in addition to the usual care 12-week leisure centre access.

15 **Outcome measures.** Cardiorespiratory fitness, vascular health, PA, and mental wellbeing were measured at baseline, 12 weeks, and 6 months (PA and mental wellbeing only). Fitness centre engagement (Co-PARS and usual care) and behaviour change consultation attendance (Co-PARS) were assessed. Following an intention-to-treat approach, repeated-measures linear mixed models were used to explore intervention effects.

20 **Results.** Significant improvements in cardiorespiratory fitness ( $p=.002$ ) and vascular health ( $p=.002$ ) were found in Co-PARS compared to usual care and no-treatment at 12 weeks. No significant changes in PA or wellbeing at 12 weeks or 6 months were noted. Intervention engagement was higher in Co-PARS than usual care, though this was not statistically significant.

24 **Conclusion.** A co-produced PA behaviour change intervention led to promising improvements in cardiorespiratory and vascular health at 12 weeks, despite no effect for PA levels at 12 weeks or 6 months.

28 **Trial registration:** ClinicalTrials.gov: NCT03490747

30 **Keywords:** Cardiovascular Health; Self-Determination Theory; Exercise Referral; Behaviour Change Intervention; Translational Research.

## Strengths and limitations of the study

- This study advances the literature on exercise referral effectiveness by pragmatically evaluating a co-produced physical activity referral intervention, which was underpinned by multiple stakeholders and behaviour change theory.
- The study documents the third phase of a novel and iterative approach which co-produced, piloted, and then evaluated (this study) a physical activity referral intervention that was deemed feasible to implement in practice.
- Objective and subjective measures provide insight into the potential effects for patient health.
- It is not possible to directly attribute intervention effects to the phased co-production approach, although supported by the Medical Research Council.
- A larger sample size is needed to substantiate findings.

## Funding

This project was supported by a PhD studentship for Benjamin Buckley from Liverpool John Moores University. The 6-month data collection and analysis was supported by a financial grant from NHS Liverpool Clinical Commissioning Group.

## Competing interests

The authors declare that they have no competing interests.

## Authors' contributions

BJRB contributed to the study design, data collection, data analysis, and preparation of the final document. PMW, DHJT, and RCM contributed to the study design, data analysis, and preparation of the final document. MC contributed to the data collection and approved the final version. LEFG, FG, DC, PW, and GW intellectually contributed to this paper and approved the final version.

## Availability of data and materials

The datasets used and/or analysed during the current study are available from the corresponding author on reasonable request. Additional data were collected to investigate psychosocial processes of change, intervention fidelity and cost-effectiveness; due to space limitations they are not considered in the present manuscript, but findings can be obtained on request from [p.m.watson@ljmu.ac.uk](mailto:p.m.watson@ljmu.ac.uk).

## Word count

~3000

## Ethics approval and consent to participate

1  
2  
3 1 Full written consent was obtained from participants and the study was approved by NHS Research  
4 2 Ethics Committee (REC: 18/NW/0039 - Project: 238547).

### 6 3 **Acknowledgements**

8 4 We would like to thank the participants in this study for their time, the delivery staff and centre  
9 5 managers for their ongoing support, and the initial development group involved in the co-production  
11 6 process.

## 15 8 **INTRODUCTION**

17 9 Physical inactivity is the fourth leading cause of death worldwide and costs the UK an estimated £7.4  
18 10 billion annually, including £0.9 billion to the NHS alone[1]. Exercise referral schemes (ERSs) provide a  
21 11 promising framework to facilitate physical activity (PA) behaviour change in at-risk populations.  
23 12 Typically, UK ERSs consist of a referral from a healthcare professional to a 12-16-week tailored exercise  
26 13 programme provided by a qualified practitioner.

28 14 There is inconsistent evidence as to the effectiveness of ERSs on PA behaviour, mental well-being,  
30 15 quality of life, and physical health outcomes [2–4]. More recently, however, promising effects of ERSs  
32 16 have been demonstrated in Wales [5], Sweden [6], and Spain [7] and a systematic review identified  
35 17 promising effects of UK ERSs on self-reported PA and cardiovascular health markers [8]. Prior and  
37 18 colleagues [9] demonstrated that for every 11 participants referred to a 24-week ERS, 1 participant  
39 19 went on to report achieving  $\geq 90$  min/week of PA at 12-months. For perspective, it is estimated that  
41 20 67-167 patients (categorised as  $\leq 10\%$  cardiovascular disease (CVD) risk) need to receive statin  
43 21 treatment for 5 years to prevent one major vascular event [10]. Whilst we are not suggesting PA  
46 22 behaviour change is a comparable outcome to a serious clinical event, it is notable that replacing 30  
48 23 minutes of TV viewing time with PA across the UK population, could reduce premature mortality by  
50 24 5-15%, depending on activity intensity [11]. The majority of studies evaluating ERSs, however, have  
52 25 drawn on self-reported PA data and future studies employing device-based measures are needed to  
54 26 substantiate these observations.

57 27 Despite recent promise for the effectiveness of ERSs [7–9,12], substantial heterogeneity exists in both  
59 28 design and delivery [13,14], reflecting varying assumptions on how best to promote health behaviour



1  
2  
3 1 change [15,16]. This limits potential scalability of 'successful' ERSs. Traditionally, ERSs have focussed  
4  
5 2 on short-term exercise prescription without appropriate evidence of effectiveness or underpinning of  
6  
7 3 behaviour change theory [17]. A recent attempt to integrate behaviour change theory into an ERS [18]  
8  
9 4 however, showed no advantage over a standard ERS at 12 weeks or 6 months. The authors noted  
10  
11 5 considerable implementation challenges when training staff, such as work-related demands that may  
12  
13 6 have reduced the importance of the theory-based training. It is plausible that delivery staff asked to  
14  
15 7 implement interventions designed by academics may lack ownership and feel less  
16  
17 8 motivated/competent. One potential way to promote ownership and engagement might be to adopt  
18  
19 9 a co-production approach, as a means of co-creating value across the public sector [19–21]. Though  
20  
21 10 not a panacea, the involvement of practitioners, managers and service-users in co-production has  
22  
23 11 potential to improve intervention relevance, fidelity, and effectiveness [22].  
24  
25 12 Previously, a theoretically-grounded PA referral scheme (Co-PARS) was co-produced by academics,  
26  
27 13 policy-makers, practitioners, and service-users [23] in Liverpool, UK, with a focus on supporting  
28  
29 14 sustainable PA behaviour change. Liverpool is the 3rd most deprived local authority in England and  
30  
31 15 has the 2nd highest proportion of Lower Super Output Areas (LSOAs) in the most deprived 10%  
32  
33 16 nationally [24]. Interventional work with at-risk patients is therefore critical and is aligned with the  
34  
35 17 concept of proportionate universalism [25]. Underpinned by self-determination theory [24], the co-  
36  
37 18 produced intervention differed from usual ERS care in its focus on PA behaviour change (rather than  
38  
39 19 exercise prescription), and inclusion of frequent one-to-one consultations with exercise referral  
40  
41 20 practitioners (compared to usual care which included formal contact at induction only). A pilot of Co-  
42  
43 21 PARS [26] showed clinically meaningful improvements in cardiorespiratory fitness (CRF) and PA,  
44  
45 22 although as we did not include a usual care control, it was unknown whether these effects were due  
46  
47 23 to the fact participants were taking part in an ERS or due to the unique elements of Co-PARS.  
48  
49 24 Furthermore, despite having very low CRF ( $<27.7 \text{ ml}\cdot\text{kg}^{-1}\cdot\text{min}^{-1}$ ) [26] we found 64% of the baseline pilot  
50  
51 25 sample were meeting the PA guidelines [27] of at least 150 minutes moderate-intensity PA per week  
52  
53 26 (measured objectively via accelerometry). This suggested CRF may be a more appropriate primary  
54  
55  
56  
57  
58  
59  
60

1  
2  
3 1 outcome measure than PA for this low-fit population (whilst changing PA behaviour was the focus of  
4  
5 2 the intervention, a target health outcome of this behaviour change was improved CRF). The pilot also  
6  
7 3 allowed the opportunity to investigate delivery processes, and we noted several areas that required  
8  
9 4 refinement in preparation for a controlled trial. These refinements included, increasing the number  
10  
11 5 of behaviour change consultations from four to five; enhanced focus on daily PA opportunities (rather  
12  
13 6 than focussing on activities offered at the fitness centre); adapting staff timetables to promote  
14  
15 7 consistency of care and to allow participant one-to-one consultations to take place in a private room;  
16  
17 8 and reducing practitioner paperwork. Building on our previous pilot work, the aim of the current study  
18  
19 9 was to investigate the effectiveness of Co-PARS compared to a usual care ERS and a no-treatment  
20  
21 10 control on change in cardiorespiratory fitness (CRF) at 12 weeks and PA and wellbeing at 6 months.

## 25 11 **METHODS**

### 27 12 **Study Design**

28  
29  
30 13 A three-arm quasi-experimental trial involving: 1. Co-PARS (delivered at fitness centre A); 2. usual care  
31  
32 14 ERS (delivered at fitness centre B); and 3. no-treatment control. This paper reports trial outcomes  
33  
34 15 (CRF, vascular health, PA, mental wellbeing) measured at baseline, 12 weeks, and 6 months (PA and  
35  
36 16 mental wellbeing only). Additional data were collected to investigate psychosocial processes of  
37  
38 17 change, intervention fidelity and cost-effectiveness; due to space limitations they are not considered  
39  
40 18 in the present manuscript, but findings can be obtained on request from p.m.watson@ljmu.ac.uk. Full  
41  
42 19 written consent was obtained from participants and the study was approved by NHS Research Ethics  
43  
44 20 Committee (REC: 18/NW/0039 - Project: 238547) and registered on ClinicalTrials.gov (NCT03490747).

### 48 21 **Patient and Public Involvement**

49  
50 22 The intervention was previously co-produced, piloted, and adapted with substantial service user input  
51  
52 23 [23,26].

### 55 24 **Participants and Recruitment**

1  
2  
3 1 Inclusion criteria were the same for all three conditions (Co-PARS, usual care, no-treatment).  
4  
5 2 Participants were eligible if aged  $\geq 18$  years with a health-related risk factor (e.g. hypertension,  
6  
7 3 hyperglycaemia, obesity) and/or health condition (e.g. diabetes, cardiovascular disease, depression)  
8  
9 4 that may be alleviated by increasing PA levels. Participants with uncontrolled health conditions, severe  
10  
11 5 psychological or neurological conditions were excluded. Participants for the Co-PARS and usual care  
12  
13 6 arms were recruited from fitness centre A (Co-PARS) and fitness centre B (usual care) respectively  
14  
15 7 (where they had been referred for exercise by a health professional). Reception staff at both centres  
16  
17 8 provided study information and gained consent to pass participant details to the researcher.  
18  
19 9 Participants for the no-treatment control were recruited via posters, electronic invitations, and email  
20  
21 10 communications primarily at the university site. Participants were not eligible for the no-treatment  
22  
23 11 control if they were currently attending an exercise referral scheme. Interested participants for all  
24  
25 12 groups were sent an information sheet and baseline data collection was arranged.

### 13 **Study Arms**

14 Intervention arm components are presented in Figure 1.

15 **Usual care exercise referral scheme (ERS – centre B).** Usual care followed a standard ERS model of 12-  
16 week subsidised access to a fitness centre (swimming, gym, group classes). Participants met an  
17 exercise referral practitioner for an initial, 1-hour induction (week 1) during which a 12-week exercise  
18 programme was provided for the participant. Any further contact with a practitioner was informal and  
19 opportunistic. This system was already in place and was considered usual care for the local area.  
20 Centre B was chosen as a comparison centre due to its similarity in referral numbers and socio-  
21 economic make-up of the local population to centre A (where Co-PARS was being delivered). For  
22 example, based on areas within Liverpool ranked from 1 (most deprived) to 30 (least deprived), usual  
23 care ERS and Co-PARS were ranked respectively: 20th and 21st (income), 20th and 21st (employment),  
24 22nd and 24th (Education) and 10th and 11th (living environment).

### 25 **Co-produced PA referral scheme (Co-PARS – centre A)**

1  
2  
3 1 Participants received the same 12-week subsidised access to a fitness centre as usual care plus a series  
4  
5 2 of one-to-one behaviour change consultations (60-minute induction followed by 30-minute  
6  
7 3 consultations at weeks 4, 8, 12 and 18). A log book was provided for each participant to set action  
8  
9 4 plans, log progress and facilitate consultation discussions. Consultations were delivered by exercise  
10  
11 5 referral practitioners in an autonomy supportive counselling style, drawing on the principles of self-  
12  
13 6 determination theory [28]. This additional support aimed to encourage habitual opportunities to  
14  
15 7 increase PA as well as activities available at the fitness centre. A full description of the theoretical  
16  
17 8 underpinning and behaviour change intervention components is available elsewhere [23].

19 9 Prior to the pilot of Co-PARS [26] practitioners received training in self-determination theory-based  
20  
21 10 communication strategies led by a sport and exercise psychologist (last author [PMW]), involving a  
22  
23 11 workshop, one-to-one sessions and follow-up group meetings. Following the pilot, a further series of  
24  
25 12 group meetings involving exercise referral practitioners and the research team were held to develop  
26  
27 13 aspects of delivery that required refinement (as outlined in the introduction). Full details of the  
28  
29 14 training are available from [p.m.watson@ljmu.ac.uk](mailto:p.m.watson@ljmu.ac.uk).

30  
31 15 **No-treatment control (NTC).** Participants received a lifestyle advice booklet only (offered to all study  
32  
33 16 arms at baseline data collection), based on national guidance for PA, nutrition, smoking cessation and  
34  
35 17 alcohol consumption.

36  
37  
38 18 [INSERT FIGURE 1 SOMEWHERE HERE]

39  
40  
41 19

## 42 43 44 20 **Outcome measures**

45  
46  
47 21 **Primary outcome: Cardio-respiratory fitness (CRF).** Maximal oxygen consumption ( $\text{VO}_{2\text{max}^2}$ ) was  
48  
49 22 estimated via the sub-maximal Astrand-Rhyming cycle ergometer protocol [29]. The protocol is a  
50  
51 23 single-stage cycling test designed to elicit a steady-state heart rate over a period of ~6 minutes.

52  
53  
54 24 **Accelerometer-derived PA.** Tri-axial ActiGraph GT3x accelerometers (ActiGraph, Pensacola, FL, USA)  
55  
56 25 measured PA for 7 days, which have been validated in a comparable population [30]. Raw triaxial

1 acceleration values were converted into an omnidirectional measure of acceleration, referred to as  
2 Euclidian norm minus one [31]. Minimum wear time was 10 hours per day and 3 days per week  
3 including one weekend day [32]. The R package GGIR [31] facilitated extraction of user-defined  
4 acceleration thresholds: 5.9 to 69.1 mg for light-intensity PA [33], 69.1 to 258.7 mg as moderate and  
5 >258.7 mg as vigorous-intensity PA [34].

6 *Vascular health.* Our previous work has demonstrated carotid artery reactivity (CAR) may be a  
7 promising outcome variable to assess in PA interventions for at-risk populations [35]. Further,  
8 endothelial function may provide prognostic value beyond that of traditional risk factors [36] with an  
9 increase of 1% in brachial artery flow-mediated dilation (FMD) associated with a 12-15% lower risk of  
10 CV events [33,34]. FMD and CAR were measured using ultrasound techniques [35]. Both techniques  
11 measure vascular endothelial function and have independently predicted future risk of cardiovascular  
12 events in humans [36,37]. Blood pressure was measured in the supine position using an automated  
13 blood pressure device (Omron Healthcare UK Limited, Milton Keynes, UK).

14 *Anthropometric measures.* Since obesity is a critical risk factor for poor health and cardiovascular  
15 disease, anthropometric variables were measured to investigate potential intervention effects on  
16 body mass. Waist-to-height ratio is a stronger predictor of early health risk than Body Mass Index  
17 (BMI) alone [38], therefore we collected both BMI (mass in kg / stature in m<sup>2</sup>) and waist-to-height  
18 ratio (waist circumference / stature).

19 *Mental wellbeing.* As PA is known to enhance mental wellbeing [39] and clinical populations are more  
20 susceptible to mental ill-health [40], it was important to identify whether Co-PARS led to any changes  
21 in mental health (positive or negative). Mental wellbeing was measured using the 14-item Warwick-  
22 Edinburgh Mental Well-being Scale (WEMWBS; [41], which asks participants to rate their  
23 psychological wellbeing (e.g. "I've been feeling cheerful") over the previous 2 weeks (measured on a  
24 likert scale of 1 (none of the time) to 5 (all of the time)).

1 *Fitness centre engagement (Co-PARS and usual care only)*. The number of occasions participants  
 2 attended the fitness centre between baseline and 12 weeks (weekly attendance) and 12 weeks to 6  
 3 months (monthly attendance) was obtained from computerised attendance records. When  
 4 measuring intervention engagement it was deemed inappropriate to calculate the mean number of  
 5 sessions per week, since this could exaggerate the engagement of individuals who attended with  
 6 high frequency in the early weeks then dropped out (when compared with individuals who attended  
 7 moderately but consistently for the full 12 weeks). Therefore a formula was used to calculate a  
 8 percentage for '12-week engagement' (based on the recommended bi-weekly attendance):

$$\left( \frac{(n1*0.5) + (n2) + (n3*1.2)}{12} \right) * 100$$

n1 = number of weeks in which participant attends once only  
 n2 = number of weeks in which participant attends twice  
 n3 = number of weeks in which participant attends three or more times

14 This formula took into account both *frequency* and *consistency* of attendance to yield a percentage  
 15 score that ranged from 0% (no attendance) to 120% (attendance of three or more times per week  
 16 for the whole 12 weeks).

17 Monthly attendance post-12 weeks was calculated as a mean attendance across months 4 to 6,  
 18 therefore did not take consistency of attendance into account.

19 *Behaviour change consultation attendance (Co-PARS only)*. The number of consultations offered and  
 20 attended were measured by exercise referral practitioners at induction, 4, 8, 12, and 18 weeks.

## 21 **Sample size**

22 Sample size was determined to detect a meaningful difference in CRF at 12 weeks based on our pilot  
 23 results [26]. To detect a difference of 2 ml.kg<sup>-1</sup>min<sup>-1</sup> between Co-PARS and usual care, 42 participants  
 24 were required per arm (f= .25, p= .05, power = .80). To detect a difference of 3.2 ml.kg<sup>-1</sup>min<sup>-1</sup> between  
 25 the intervention arms and the no-treatment control, 17 participants were required for the no-  
 26 treatment control (f= .5, p= .05, power = .80). Thus, a total sample of 101 participants were required.

## 1 **Statistical analyses**

2 An intention-to-treat approach was used assuming no change in non-respondents (last observation  
3 carried forward) to produce a conservative estimate of intervention effects. Delta changes ( $\Delta$ ) from  
4 pre- to post-intervention were calculated for each group and entered as the dependent variable in  
5 repeated measures linear mixed model analyses. A random intercept model was used with fixed  
6 effects for study arm (Co-PARS, usual care ERS, no-treatment control) and time (baseline-to-week-12  
7 change, week-12-to-6-month change, and baseline-to-6-month change) and participants included as  
8 random effects. Least squared difference (LSD) was used for post hoc testing. Testing for baseline  
9 differences to identify covariates was avoided, as this method has been demonstrated to inflate bias,  
10 instead pre-intervention was entered into the model as a covariate. Furthermore, all linear mixed  
11 model analyses were repeated with age and employment as covariates as a comparison to the results  
12 presented in this study (with baseline score as a covariate) due to their known prognostic value. Using  
13 age and employment as covariates resulted in no change in inferences presented in this study. One-  
14 way ANOVAs were used to compare baseline values between intervention arms. Fitness centre  
15 engagement was determined as described above. Behaviour change consultation attendance is  
16 presented descriptively. For non-normally distributed data, median and interquartile range is  
17 presented and within group median change was calculated via Wilcoxon signed-rank tests.

## 18 **RESULTS**

19 *Participants.* 68 participants provided baseline data, 56 of whom provided 12-week data, and 58 of  
20 whom provided 6-month data (figure 2).

21 **Baseline characteristics (table 1).** No significant differences were noted between arms for age, sex,  
22 ethnicity, BMI, referral reason, or accelerometer-derived PA levels ( $p>.05$ ). Full-time employment  
23 status ( $p=.001$ ) and CRF ( $p=.015$ ) were significantly higher in the control compared to usual care and  
24 Co-PARS. Smoking status was significantly higher in usual care compared to Co-PARS and control  
25 ( $p=.010$ ). Mental wellbeing was significantly lower in Co-PARS compared to control ( $p=.023$ ).

1

2 [INSERT FIGURE 2 SOMEWHERE HERE]

3

4

5

**Table 1.** Baseline characteristics presented as Mean  $\pm$  SD or % (n) of group.

|                                                    | Co-produced PA referral<br>(n=33) | Usual care ERS<br>(n=19) | No-treatment control<br>(n=16) | Between arm<br>p-value |
|----------------------------------------------------|-----------------------------------|--------------------------|--------------------------------|------------------------|
| Age (years)                                        | 57 $\pm$ 12                       | 53 $\pm$ 16              | 48 $\pm$ 15                    | p=.319                 |
| Female (% of sample)                               | 58 (19)                           | 47 (9)                   | 56 (9)                         | p=.774                 |
| White British (% of sample)                        | 82 (27)                           | 95 (18)                  | 75 (12)                        | p=.132                 |
| Full-time employment (% of sample)                 | 18 (6)                            | 26 (5)                   | 62 (10)                        | p=.001                 |
| Never smoked (% of sample)                         | 73 (24)                           | 37 (7)                   | 81 (13)                        | p=.002                 |
| Body mass index (kg/m <sup>2</sup> )               | 31 $\pm$ 7                        | 33 $\pm$ 6               | 29 $\pm$ 6                     | p=.226                 |
| Systolic blood pressure (mmHg)                     | 131 $\pm$ 11                      | 138 $\pm$ 18             | 123 $\pm$ 12                   | p=.010                 |
| Primary referral reason / health concern (control) |                                   |                          |                                | p=.132                 |
| Cardiometabolic (% of sample)                      | 67 (22)                           | 43 (8)                   | 62 (10)                        | -                      |
| Cancer (% of sample)                               | 6 (2)                             | 5 (1)                    | 6 (1)                          | -                      |
| Mental Health (% of sample)                        | 18 (6)                            | 26 (5)                   | 19 (3)                         | -                      |
| Musculoskeletal (% of sample)                      | 9 (3)                             | 26 (5)                   | 13 (2)                         | -                      |
| Comorbidity (% of sample)                          | 85 (28)                           | 100 (19)                 | 81 (13)                        | p=.166                 |
| Meeting the PA guidelines (% of sample)*           | 73 (22)                           | 71 (10)                  | 93 (13)                        | p=.223                 |

*P-values* represent between arm baseline effects. There was no between arm effect for referral reason, thus no between arm *p-values* are provided for referral reason sub groups.

\*Chief Medical Officers' 2019 physical activity guidelines: 150 minutes of moderate-intensity physical activity per week.

6

7 **Baseline-to-12-Week effects**



1 Raw outcome values are presented for baseline, week 12, and 6 months in Table 2. There was a  
2 significant effect for study arm in baseline-to-12-week change in CRF ( $p=.002$ ). Post hoc testing  
3 revealed a significantly higher CRF change in Co-PARS (2.4) compared to the ERS (0.3;  $p=.021$ ) and  
4 control (-0.6;  $p=.001$ ), but no difference between the ERS and control ( $p=.314$ ). A significant effect for  
5 study arm was found in change in FMD% ( $p=.002$ ), with FMD% change significantly higher in Co-PARS  
6 (2.4) compared to control (-1.1;  $p=.001$ ) but not the ERS (0.8;  $p=.099$ ). The change in FMD% was not  
7 significantly different between the ERS and control ( $p=.71$ ). No statistically significant study arm  
8 effects were noted for changes in CAR%, blood pressure, resting heart rate, anthropometric measures,  
9 PA or WEMWBS at 12 weeks ( $p>.05$ ).

#### 10 **Baseline-to-6-month effects**

11 No statistically significant study arm effects were noted for change in WEMWBS or PA at 6 months  
12 ( $p>.05$ ).

#### 13 **Fitness centre engagement (Co-PARS and usual care ERS) and consultation attendance (Co-PARS 14 only).**

15 Table 3 reports the participant fitness centre engagement data for the Co-PARS and usual care ERS.  
16 Although not statistically significant, Co-PARS engagement was 9% higher, participants attended the  
17 fitness centre on average 3 times more per month, and 23% more participants were attending the  
18 fitness centre beyond 6-months follow-up compared to usual care. Co-PARS behaviour change  
19 consultation attendance is reported in Table 4.

20

**Table 2.** Cardiometabolic health outcomes and PA levels at baseline, 12 weeks, 6 months, and between arm baseline-to 12-week or 6-month effect. All variables are presented as Mean ± SD.

|                                                   | Co-PARS   |           |         | Usual Care ERS |           |         | No-Treatment Control |           |         | Between arm effect p-value <sup>(a)</sup> |
|---------------------------------------------------|-----------|-----------|---------|----------------|-----------|---------|----------------------|-----------|---------|-------------------------------------------|
|                                                   | Baseline  | Week 12   | 6 Month | Baseline       | Week 12   | 6 Month | Baseline             | Week 12   | 6 Month |                                           |
| <b>Fitness (n=56)</b>                             |           |           |         |                |           |         |                      |           |         |                                           |
| <i>CRF</i> ml.kg. <sup>-1</sup> min <sup>-1</sup> | 22.2±7    | 24.6±7    | -       | 23.3±6.6       | 23.6±7    | -       | 29.6±9.2             | 28.9±8.7  | -       | p=.002                                    |
| <b>Physical Activity</b>                          |           |           |         |                |           |         |                      |           |         |                                           |
| <b>GT3x (n= 61) Mins.day</b>                      |           |           |         |                |           |         |                      |           |         |                                           |
| <i>Light intensity</i>                            | 90±52     | 98±64     | 107±75  | 98±36          | 93±31     | 158±145 | 90±37                | 101±33    | 86±40   | p=.332                                    |
| <i>Moderate intensity</i>                         | 44±32     | 42±29     | 42±33   | 43±28          | 43±30     | 55±55   | 60±31                | 65±24     | 54±21   | p=.260                                    |
| <i>Vigorous intensity</i>                         | 1±3       | 1±2       | 1±2     | 1±2            | 1±1       | 1±2     | 2±4                  | 2±3       | 3±8     | p=.108                                    |
| <b>Vascular Ultrasound (n=64)</b>                 |           |           |         |                |           |         |                      |           |         |                                           |
| <i>CAR%</i>                                       | 1.7±2.7   | 2.8±2.2   | -       | 2.7±1.8        | 3.9±2.8   | -       | 2.5±2.7              | 1.7±2.7   | -       | p=.073                                    |
| <i>CAR Baseline</i> cm                            | 0.69±0.07 | 0.69±0.06 | -       | 0.69±0.08      | 0.7±0.09  | -       | 0.65±0.07            | 0.64±0.06 | -       | p=.130                                    |
| <i>FMD%</i>                                       | 4.4±2.3   | 6.8±2.7   | -       | 4.2±2          | 5±2.1     | -       | 6.2±2.1              | 5.2±2.8   | -       | p=.002                                    |
| <i>FMD Baseline</i> cm                            | 0.39±0.07 | 0.38±0.06 | -       | 0.39±0.09      | 0.41 0.08 | -       | 0.38±0.08            | 0.37±0.06 | -       | p=.728                                    |
| <b>Cardiometabolic (n=68)</b>                     |           |           |         |                |           |         |                      |           |         |                                           |
| <i>BMI</i> kg.m <sup>2</sup>                      | 31±7      | 30±7      | -       | 33±6           | 32±6      | -       | 29±6                 | 29±6      | -       | p=.323                                    |
| <i>WHR</i>                                        | 62±9      | 61±10     | -       | 64±8           | 63±8      | -       | 56±9                 | 56±9      | -       | p=.261                                    |
| <i>SBP</i> mmHg                                   | 131±11    | 127±12    | -       | 138±18         | 132±15    | -       | 123±12               | 118±13    | -       | p=.937                                    |
| <i>DBP</i> mmHg                                   | 73±7      | 71±8      | -       | 73±9           | 71±11     | -       | 72±11                | 68±10     | -       | p=.584                                    |
| <i>RHR</i> bpm                                    | 70±10     | 65±10     | -       | 70±12          | 68±11     | -       | 66±12                | 63±9      | -       | p=.540                                    |
| <b>Mental Wellbeing (n=68)</b>                    |           |           |         |                |           |         |                      |           |         |                                           |
| <i>WEMWBS</i>                                     | 46±9      | 51±10     | 48±10   | 49±10          | 52±11     | 50±13   | 53±9                 | 56±9      | 53±10   | p=.796                                    |

Co-PARS, Co-produced PA referral scheme; ERS, Exercise referral scheme; CRF, Cardiorespiratory Fitness; GT3x, Accelerometer; CAR, Carotid artery reactivity; FMD, Flow-mediated dilation; BMI, Body Mass Index; WHR, Waist-to-Height ratio; SBP, Systolic blood pressure; DBP, Diastolic blood pressure; RHR, Resting heart rate, WEMWBS, Warwick-Edinburgh Mental Wellbeing Scale  
<sup>a</sup> F-statistic for between arm baseline-to-6-month change or baseline-to-week 12 change if variable not collected at 6 months.  
Missing data was due to inability to complete the CRF test (n=12), inability to complete the vascular ultrasound protocols (n=4), and insufficient accelerometer wear time or non-return (n=7).

**Table 3.** Fitness centre engagement.

|                                                                                                 | Co-PARS<br>(n=33) | Usual Care<br>(n=19) | Between centre difference |
|-------------------------------------------------------------------------------------------------|-------------------|----------------------|---------------------------|
| % Engagement <sup>a</sup> (Mean ± SD)                                                           | 42±29             | 33±27                | <i>p</i> =.267            |
| Number of fitness centre visits (per person per month) week 12 to 6 months (Med, IQR)           | 3(0-14)           | 0 (0-1)              | <i>p</i> =.072            |
| % of baseline sample who attended fitness centre at least once beyond 6 months (% of sample, n) | 39 (13)           | 16 (3)               | <i>p</i> =.101            |

<sup>a</sup>Based on the formula  $((n1*0.5)+(n2)+(n3*1.2))/12 * 100$ ; n1=number of weeks in which participant attends once only; n2=number of weeks in which participant attends twice; n3=number of weeks in which participant attends three or more times. <sup>a</sup>**Engagement**; based on a recommended attendance of twice weekly, a formula was used to calculate a percentage for "12-week engagement", which took into account both frequency and consistency of attendance (see methods).

**Table 4.** Co-PARS behaviour change consultation attendance (based on baseline sample of 33 participants).

| Consultation | % Booked (n) | % Attended (n) |
|--------------|--------------|----------------|
| Induction    | 91(30)       | 93(28)         |
| Week 4       | 82(27)       | 78(21)         |
| Week 8       | 67(22)       | 91(20)         |
| Week 12      | 64(21)       | 81(17)         |
| Week 18      | 55(18)       | 50(9)          |

## 1 DISCUSSION

2 This was the first study to investigate the effectiveness of a theoretically-grounded, co-produced PA  
3 referral scheme (Co-PARS) compared to a usual care ERS and no treatment. Despite challenges in  
4 recruitment that meant the study was statistically underpowered, the findings demonstrated  
5 significant and clinically meaningful improvements in CRF and vascular health in Co-PARS compared  
6 to the usual care and no treatment. No statistically significant effects were noted for accelerometer-  
7 derived PA levels or mental wellbeing at 12-weeks or 6-months.

8 The effect of usual care ERSs compared to theoretically-grounded interventions on CRF has not been  
9 previously explored. We observed a significant increase in CRF in Co-PARS compared to usual care and  
10 a no-treatment control. According to values reported by Clausen *et al.* [42] both Co-PARS (22 ml.kg.<sup>-1</sup>  
11 min<sup>-1</sup>) and usual care (23 ml.kg.<sup>-1</sup>min<sup>-1</sup>) participants were below the lower limit of 'healthy' (27.7  
12 ml.kg.<sup>-1</sup>min<sup>-1</sup>) for baseline CRF [43]. As low CRF is associated with a substantially elevated risk of all-  
13 cause mortality [43], the magnitude of change demonstrated in Co-PARS (2.4 ml.kg.<sup>-1</sup>min<sup>-1</sup>) may be  
14 clinically meaningful. For example, in at-risk populations, relatively small magnitudes (≤1 ml.kg.<sup>-1</sup>min<sup>-1</sup>  
15 ) have been shown to significantly reduce clustered cardiometabolic risk [44]. Thus, Co-PARS was  
16 effective at improving CRF in individuals with low CRF by a clinically meaningful amount.

17 Promising improvements in vascular health were also noted in the Co-PARS group, with brachial artery  
18 FMD significantly improved compared to usual care and control arms. Although CAR was not  
19 statistically different between arms, both Co-PARS and usual care demonstrated a potentially  
20 meaningful within-arm improvement compared with no treatment, which exhibited a deterioration in  
21 vascular health. Such improvements in vascular measures may have prognostic implications. For  
22 example, a 1% increase in FMD has been suggested to reduce the future risk of CVD events by 13%  
23 [36].

24 Despite low baseline CRF, a substantial percentage of Co-PARS (73%) and usual care (71%) participants  
25 were meeting the Department of Health [45] guidelines of 150 minutes of moderate-intensity PA per

1 week. We observed a similar finding in our pilot [26] and subsequently raised the question as to the use of PA guidelines to assess eligibility for ERSs (NICE, 2014), as it appears from our data that individuals classified as “physically active” can still be very unfit and therefore can benefit from ERSs in terms of improved fitness and cardiometabolic health. A further discrepancy was noted in the lack of change in PA levels in Co-PARS, despite improved CRF. It is possible measurement issues contributed to this discrepancy. Accelerometers can measure certain types of PA such as walking, running, and stair climbing [46]. They may not, however, sufficiently identify activities typical of an ERS delivered within a fitness centre environment (e.g. cycling, resistance training, circuits, swimming). Given Co-PARS had higher (albeit non-significant) fitness centre engagement compared to usual care, it is possible PA changes occurred that were not detected by the accelerometry data. Consideration therefore needs to be given to the appropriateness of accelerometers to measure PA in ERSs. Alternative methods such as heart-rate monitors combined with self-report data may be worthy of consideration, although further work would be required to develop standardized data collection and analysis protocols (taking into account the limitations of each of these methods if used in isolation [47]). Researchers are therefore urged to consider CRF as a primary outcome in ERSs until appropriate alternative methods of measuring PA behaviour are developed. Ultimately, it is not clear why the increase in fitness occurred without a corresponding change in PA and further research is required to elucidate the relationship between PA and fitness in this population.

In addition to physiological health outcomes, we found baseline mental wellbeing to be below the national average (score of 50) in both Co-PARS (46) and usual care (49), but not the control (53) [48]. Despite no significant between-group effect for mental wellbeing, within-group changes at 12 weeks were deemed clinically meaningful for Co-PARS (5) and usual care (3) but not in the no treatment control. It is notable that the post-intervention magnitude of change observed in mental wellbeing for Co-PARS (5) was larger than that observed in a meta-analysis encompassing >23,000 participants across 13 different ERSs (3), which were comparable in nature to the usual care ERS in this study [49].

1  
2  
3 1 From the 6-month data it appeared the scheme was not effective at promoting *sustained* PA behaviour  
4  
5 2 change or mental wellbeing improvements. It must be noted, however, that the wellbeing levels were  
6  
7 3 still higher than baseline and even small magnitudes of change (1-3) may be meaningful in clinical  
8  
9 4 populations [50]. As discussed earlier, it may be that measuring PA using the methods described in  
10  
11 5 this study prevented the identification of activities typical of a fitness centre environment. This notion  
12  
13 6 is supported by the post-week-12 attendance data, which highlighted Co-PARS participants were  
14  
15 7 regularly attending the fitness centre whereas the usual care participants were not. Challenges of  
16  
17 8 maintaining sustained health outcomes post-ERSs have been highlighted elsewhere [3]. And whilst a  
18  
19 9 recent systematic review reported longer length schemes (>20 weeks) may be more effective than  
20  
21 10 shorter schemes [8], the four long ERSs (20-26 weeks) collected pre-post data only. Thus we do not  
22  
23 11 know if longer length ERSs result in enhanced health outcomes *post intervention* compared with  
24  
25 12 shorter schemes. To determine if longer length schemes are indeed more effective, longer-term  
26  
27 13 follow-up data collection is required, ideally at 6 and 12 months post intervention [51].  
28  
29  
30  
31  
32

33 14 Through a phased approach we have assessed the effectiveness of Co-PARS resulting from several  
34  
35 15 years of co-production. Whilst the effects of co-production are difficult to isolate, a comparison of  
36  
37 16 results at different stages of intervention refinement suggests the phased development approach had  
38  
39 17 some positive effects. Unpublished engagement data from centre A in 2014-2015 (when the centre  
40  
41 18 was running a usual care ERS) shows that engagement improved after the introduction of Co-PARS  
42  
43 19 (42% vs 28% in 2014-2015), whereas engagement reduced in the usual care centre over the same  
44  
45 20 period (32% vs 37% in 2014-2015). Furthermore, consultation attendance for Co-PARS in the current  
46  
47 21 study was substantially higher than in our previous pilot (54% attended induction plus  $\geq 3$  behaviour  
48  
49 22 change consultations, vs 9% in the pilot [26]), which may have been a reflection of refinements made  
50  
51 23 to the intervention after the pilot (e.g. improved focus on holistic PA, improved monitoring  
52  
53 24 procedures, improved continuity of instructors). These improvements in engagement highlight the  
54  
55 25 importance of allowing time for complex interventions to develop [52], and are particularly promising  
56  
57 26 given the effectiveness of ERSs are highly dependent on participant adherence [5,21]. Furthermore,  
58  
59  
60

1 this study has demonstrated how investing in the “bottom-up” development of an intervention can  
2 lead to an effective and sustainable model. We therefore support the arguments of Rutter and  
3 colleagues [53] in that a shift in thinking is needed, instead of asking whether an intervention works  
4 to fix a problem, researchers should aim to identify if and how it contributes to reshaping a system in  
5 a favourable way. As such, we propose the co-production and implementation process may be as  
6 important as the scheme content itself.

### 7 **Methodological considerations**

8 This is the first known study to investigate the effectiveness of a co-produced PA referral scheme (Co-  
9 PARS) in comparison to usual care and a no-treatment control. Our novel approach addresses an  
10 important gap in the sport and exercise medicine literature [54], in that we employed rigorous  
11 laboratory-based instruments to measure health outcomes that can be achieved through an  
12 ecologically valid, “real-world” intervention. We observed a very high retention at 6-month follow up,  
13 which may be due in part to the fact many of the participants were retired (and therefore may have  
14 more available time). It is possible also that the high retention was facilitated by the co-production  
15 process, which involved ongoing relationships between the research and delivery teams (and  
16 therefore helped with the logistics of returning accelerometers for the co-PARS and usual care  
17 groups). Whilst this paper highlights many strengths of co-production, we do not wish to present co-  
18 production as a panacea [19] and it is important potential challenges and costs are considered prior  
19 to undertaking such an approach [21,22].

20 We must acknowledge some limitations of the study. Whilst there is a need for high-quality RCTs of  
21 theoretically informed approaches to PA behaviour change [3], several pragmatic reasons meant an  
22 RCT approach was not appropriate for the present study. Firstly, it was important participants could  
23 choose the most convenient fitness centre. Secondly, it was important we continued work with the  
24 same fitness centre and staff (following co-production [23] and pilot [26] phases) in order to develop  
25 the intervention to the point where it was deemed to have a worthwhile effect [52]. A pragmatic

1  
2  
3 1 research approach was therefore deemed most appropriate to evaluate Co-PARS with high ecological  
4  
5 2 validity. Pragmatic constraints (e.g. fitness centre refurbishments, staff illness) did however mean the  
6  
7 3 required sample size was not achieved, thus inferences of effectiveness need to be taken with caution.  
8  
9 4 This is particularly true for the PA data, where the relatively high variability (compared with CRF) may  
10  
11 5 have contributed to the lack of change observed in PA in this study. It is recommended future work  
12  
13 6 considers pragmatic risks and contingencies when planning recruitment and plans sufficient time to  
14  
15 7 cope with recruitment delays. For pragmatic reasons, not all outcomes were collected at 6-months  
16  
17 8 follow-up and further research is needed to collect long-term, objective health data following PA  
18  
19 9 referral schemes. Finally, it must be noted that while the trial registration appears to be retrospective  
20  
21 10 (April 6<sup>th</sup> 2018), the initial submission was several months prior to this (January 11<sup>th</sup> 2018). Final sign-  
22  
23 11 off was delayed due to capacity issues within the research team.  
24  
25  
26  
27  
28

## 29 **CONCLUSION**

30  
31  
32 13 A co-produced, theoretically-grounded PA referral scheme (Co-PARS) led to improved CRF and  
33  
34 14 vascular health in at-risk individuals when compared to usual care and no treatment. In addition,  
35  
36 15 clinically meaningful improvements in vascular health and mental wellbeing were observed at 12-  
37  
38 16 weeks in both Co-PARS and usual care, but not the no treatment control group. Of note, PA remained  
39  
40 17 unchanged at 12-weeks and 6-months follow-up. Adopting a phased approach has enabled multi-  
41  
42 18 stakeholder input and ongoing intervention refinement, resulting in an intervention that showed  
43  
44 19 promising effects on engagement and clinically meaningful improvements to participant health.  
45  
46  
47  
48  
49  
50  
51  
52  
53  
54  
55  
56  
57  
58  
59  
60



1  
2  
3 **1 Figure Legends**  
4

5 **2 Figure 1.** 'PaT Plot' describing intervention arm components.[55]  
6

7 **3 Figure 2.** Participant flow diagram within the three study arms (March 2018-January 2019).  
8  
9

10  
11 **4**  
12

13  
14 **5**  
15

16  
17 **6**  
18

19  
20 **7**  
21

22  
23 **8**  
24

25  
26 **9**  
27

28  
29  
30 **10**  
31

32  
33 **11**  
34

35  
36 **12**  
37

38  
39 **13**  
40

41  
42 **14**  
43

44  
45  
46 **15**  
47

48  
49 **16**  
50

51  
52 **17**  
53

54  
55  
56 **18**  
57

58  
59 **19**  
60

For peer review only

## 1           2           3           4           5           6           7           8           9           10           11           12           13           14           15           16           17           18           19           20           21           22           23           24           25           26           27           28           29           30           31           32           33           34           35           36           37           38           39           40           41           42           43           44           45           46           47           48           49           50           51           52           53           54           55           56           57           58           59           60

## 1    **References**

2           3           4           5           6           7           8           9           10           11           12           13           14           15           16           17           18           19           20           21           22           23           24           25           26           27           28           29           30           31           32           33           34           35           36           37           38           39           40           41           42           43           44           45           46           47           48           49           50           51           52           53           54           55           56           57           58           59           60

1    2    Public Health England. Physical activity: applying All Our Health. 2019.

3           4           5           6           7           8           9           10           11           12           13           14           15           16           17           18           19           20           21           22           23           24           25           26           27           28           29           30           31           32           33           34           35           36           37           38           39           40           41           42           43           44           45           46           47           48           49           50           51           52           53           54           55           56           57           58           59           60

2    3    Dugdill L, Graham RC, McNair F. Exercise referral: the public health panacea for physical activity promotion? A critical perspective of exercise referral schemes; their development and evaluation. *Ergonomics* 2005;**48**:1390–410. doi:10.1080/00140130500101544

3           4           5           6           7           8           9           10           11           12           13           14           15           16           17           18           19           20           21           22           23           24           25           26           27           28           29           30           31           32           33           34           35           36           37           38           39           40           41           42           43           44           45           46           47           48           49           50           51           52           53           54           55           56           57           58           59           60

3    4    Pavey T, Taylor A, Fox K, *et al.* Effect of exercise referral schemes in primary care on physical activity and improving health outcomes: systematic review and meta-analysis. *Bmj* 2011;**343**:d6462. doi:10.1136/bmj.d6462

4           5           6           7           8           9           10           11           12           13           14           15           16           17           18           19           20           21           22           23           24           25           26           27           28           29           30           31           32           33           34           35           36           37           38           39           40           41           42           43           44           45           46           47           48           49           50           51           52           53           54           55           56           57           58           59           60

4    5    Pavey T, Anokye N, Taylor A, *et al.* The clinical effectiveness and cost-effectiveness of exercise referral schemes: a systematic review and economic evaluation. *Health technology assessment (Winchester, England)* 2011;**15**:i–xii, 1–254. doi:10.3310/hta15440

5           6           7           8           9           10           11           12           13           14           15           16           17           18           19           20           21           22           23           24           25           26           27           28           29           30           31           32           33           34           35           36           37           38           39           40           41           42           43           44           45           46           47           48           49           50           51           52           53           54           55           56           57           58           59           60

5    6    Murphy SM, Edwards RT, Williams N, *et al.* An evaluation of the effectiveness and cost effectiveness of the National Exercise Referral Scheme in Wales, UK: a randomised controlled trial of a public health policy initiative. *Journal of epidemiology and community health* 2012;**66**:745–53. doi:10.1136/jech-2011-200689

6           7           8           9           10           11           12           13           14           15           16           17           18           19           20           21           22           23           24           25           26           27           28           29           30           31           32           33           34           35           36           37           38           39           40           41           42           43           44           45           46           47           48           49           50           51           52           53           54           55           56           57           58           59           60

6    7    Onerup A, Arvidsson D, Blomqvist Å, *et al.* Physical activity on prescription in accordance with the Swedish model increases physical activity: a systematic review. *Br J Sports Med* 2018;;:bjsports-2018-099598. doi:10.1136/bjsports-2018-099598

7           8           9           10           11           12           13           14           15           16           17           18           19           20           21           22           23           24           25           26           27           28           29           30           31           32           33           34           35           36           37           38           39           40           41           42           43           44           45           46           47           48           49           50           51           52           53           54           55           56           57           58           59           60

7    8    Martín-Borràs C, Giné-Garriga M, Puig-Ribera A, *et al.* A new model of exercise referral scheme in primary care: is the effect on adherence to physical activity sustainable in the long term? A 15-

- 1  
2  
3 1 month randomised controlled trial. *BMJ Open* 2018;**8**:e017211. doi:10.1136/bmjopen-2017-017211  
4  
5 2  
6  
7 3 8 Rowley N, Mann S, Steele J, *et al.* The effects of exercise referral schemes in the United Kingdom in  
8 those with cardiovascular, mental health, and musculoskeletal disorders: a preliminary systematic  
9  
10 4 review. *BMC Public Health* 2018;**18**:949. doi:10.1186/s12889-018-5868-9  
11  
12 5  
13  
14 6  
15  
16 7 9 Prior F, Coffey M, Robins A, *et al.* Long-Term Health Outcomes Associated With an Exercise  
17 Referral Scheme: An Observational Longitudinal Follow-Up Study. *Journal of Physical Activity and*  
18  
19 8 *Health* 2019;**1**–6. doi:10.1123/jpah.2018-0442  
20  
21 9  
22  
23 10  
24  
25 11 10 Taylor F, Huffman MD, Macedo A, *et al.* Statins for the primary prevention of cardiovascular  
26 disease. *Cochrane Db Syst Rev* 2013;**1**:CD004816. doi:10.1002/14651858.cd004816.pub5  
27  
28 12  
29  
30 13  
31  
32 14 11 Wijndaele K, Sharp SJ, Wareham NJ, *et al.* Mortality Risk Reductions from Substituting Screen  
33 Time by Discretionary Activities. *Med Sci Sport Exer* 2017;**49**:1111–9.  
34  
35 15  
36 16 doi:10.1249/mss.0000000000001206  
37  
38  
39 17  
40  
41 18 12 Craike M, Wiesner G, Enticott J, *et al.* Equity of a government subsidised exercise referral scheme:  
42 A population study. *Social Science & Medicine* Published Online First: 2018.  
43  
44 19  
45 20 doi:10.1016/j.socscimed.2018.09.023  
46  
47  
48 21  
49  
50 22 13 Craig A, Dinan S, Smith A, *et al.* Exercise Referral Systems: A National Quality Assurance  
51 Framework. *Department of Health: London* Published Online First: 2001.discovery.ucl.ac.uk  
52  
53 23  
54  
55 24  
56  
57 25 14 Pavey T, Taylor A, Hillsdon M, *et al.* Levels and predictors of exercise referral scheme uptake and  
58 adherence: a systematic review. *J Epidemiol Commun H* 2012;**66**:737–44. doi:10.1136/jech-2011-  
59  
60

1  
2  
3  
4  
5  
6  
7  
8  
9  
10  
11  
12  
13  
14  
15  
16  
17  
18  
19  
20  
21  
22  
23  
24  
25  
26  
27  
28  
29  
30  
31  
32  
33  
34  
35  
36  
37  
38  
39  
40  
41  
42  
43  
44  
45  
46  
47  
48  
49  
50  
51  
52  
53  
54  
55  
56  
57  
58  
59  
60

1 200354

2

3 15 Littlecott HJ, Moore GF, Moore L, *et al.* Psychosocial mediators of change in physical activity in  
4 the Welsh national exercise referral scheme: secondary analysis of a randomised controlled trial.  
5 *International Journal of Behavioral Nutrition and Physical Activity* 2014;**11**:1–11.

6 doi:10.1186/s12966-014-0109-9

7

8 16 Hanson CL, Oliver EJ, Dodd-Reynolds CJ, *et al.* How do participant experiences and characteristics  
9 influence engagement in exercise referral? A qualitative longitudinal study of a scheme in  
10 Northumberland, UK. *Bmj Open* 2019;**9**:e024370. doi:10.1136/bmjopen-2018-024370

11

12 17 Sowden S, Raine R. Running along parallel lines: how political reality impedes the evaluation of  
13 public health interventions. A case study of exercise referral schemes in England. *Journal of  
14 epidemiology and community health* 2008;**62**:835–841. doi:10.1136/jech.2007.069781

15

16 18 Duda JL, Williams GC, Ntoumanis N, *et al.* Effects of a standard provision versus an autonomy  
17 supportive exercise referral programme on physical activity, quality of life and well-being indicators:  
18 a cluster randomised controlled trial. *The international journal of behavioral nutrition and physical  
19 activity* 2014;**11**:10. doi:10.1186/1479-5868-11-10

20

21 19 Ostrom E. Crossing the great divide: Coproduction, synergy, and development. *World  
22 Development* 1996;**24**:1073–87. doi:10.1016/0305-750x(96)00023-x

23

24 20 Clarke D, Jones F, Harris R, *et al.* What outcomes are associated with developing and  
25 implementing co-produced interventions in acute healthcare settings? A rapid evidence synthesis.  
26 *BMJ open* 2017;**7**:e014650. doi:10.1136/bmjopen-2016-014650

- 1  
2  
3 1  
4  
5 2 21 Farrance C, Tsofliou F, Clark C. Adherence to community based group exercise interventions for  
6  
7 3 older people: A mixed-methods systematic review. *Preventive medicine* 2016;**87**:155–66.  
8  
9 4 doi:10.1016/j.ypmed.2016.02.037  
10  
11 5  
12  
13 6 22 Rycroft-Malone J, Burton CR, Bucknall T, *et al.* Collaboration and Co-Production of Knowledge in  
14  
15 7 Healthcare: Opportunities and Challenges. *International journal of health policy and management*  
16  
17 8 2016;**5**:221–3. doi:10.15171/ijhpm.2016.08  
18  
19 9  
20  
21 10 23 Buckley B, Thijssen D, Murphy R, *et al.* Making a move in exercise referral: co-development of a  
22  
23 11 physical activity referral scheme. *Journal of Public Health* Published Online First: 2018.  
24  
25 12 doi:10.1093/pubmed/fdy072  
26  
27 13  
28  
29 14 24 The English indices of deprivation 2019. 2019.  
30  
31 15  
32  
33 16 25 Carey G, Crammond B, Leeuw E. Towards health equity: a framework for the application of  
34  
35 17 proportionate universalism. *Int J Equity Health* 2015;**14**:81. doi:10.1186/s12939-015-0207-6  
36  
37 18  
38  
39 19 26 Buckley BJ, Thijssen DH, Murphy RC, *et al.* Preliminary effects and acceptability of a co-produced  
40  
41 20 physical activity referral intervention. *Health Educ J* 2019;:001789691985332.  
42  
43 21 doi:10.1177/0017896919853322  
44  
45 22  
46  
47 23 27 Department of Health & Social Care. UK Chief Medical Officers' Physical Activity Guidelines. 2019.  
48  
49 24  
50  
51 25 28 Ryan R, Deci E. Self-determination theory and the facilitation of intrinsic motivation, social  
52  
53 26 development, and well-being. *The American psychologist* 2000;**55**:68–78.  
54  
55  
56  
57  
58  
59  
60

1  
2  
3  
4  
5  
6  
7  
8  
9  
10  
11  
12  
13  
14  
15  
16  
17  
18  
19  
20  
21  
22  
23  
24  
25  
26  
27  
28  
29  
30  
31  
32  
33  
34  
35  
36  
37  
38  
39  
40  
41  
42  
43  
44  
45  
46  
47  
48  
49  
50  
51  
52  
53  
54  
55  
56  
57  
58  
59  
60

1  
2  
3  
4  
5  
6  
7  
8  
9  
10  
11  
12  
13  
14  
15  
16  
17  
18  
19  
20  
21  
22  
23  
24  
25  
26  
27  
28  
29  
30  
31  
32  
33  
34  
35  
36  
37  
38  
39  
40  
41  
42  
43  
44  
45  
46  
47  
48  
49  
50  
51  
52  
53  
54  
55  
56  
57  
58  
59  
60

29 Astrand I. Aerobic work capacity in men and women with special reference to age. *Acta physiologica Scandinavica Supplementum* 1960;**49**:1–92.

30 Kelly LA, McMillan DG, Anderson A, *et al.* Validity of actigraphs uniaxial and triaxial accelerometers for assessment of physical activity in adults in laboratory conditions. *BMC Medical Physics* 2013;**13**:1–7. doi:10.1186/1756-6649-13-5

31 Hees VT, Gorzelniak L, Leon E, *et al.* Separating movement and gravity components in an acceleration signal and implications for the assessment of human daily physical activity. *PLoS one* 2013;**8**:e61691. doi:10.1371/journal.pone.0061691

32 Matthews CE, Hagströmer M, Pober DM, *et al.* Best Practices for Using Physical Activity Monitors in Population-Based Research. *Medicine & Science in Sports & Exercise* 2012;**44**:S68. doi:10.1249/MSS.0b013e3182399e5b

33 Bakrania K, Yates T, Rowlands AV, *et al.* Intensity Thresholds on Raw Acceleration Data: Euclidean Norm Minus One (ENMO) and Mean Amplitude Deviation (MAD) Approaches. *PLOS ONE* 2016;**11**:e0164045. doi:10.1371/journal.pone.0164045

34 Hilded M, Hees Vt, Hansen B, *et al.* Age Group Comparability of Raw Accelerometer Output from Wrist- and Hip-Worn Monitors. *Medicine & Science in Sports & Exercise* 2014;**46**:1816. doi:10.1249/mss.0000000000000289

35 Buckley B, Watson PM, Murphy RC, *et al.* Carotid artery function is restored in subjects with elevated cardiovascular disease risk following a 12-week physical activity intervention. *Canadian*

- 1  
2  
3 1 *Journal of Cardiology* Published Online First: 2018. doi:10.1016/j.cjca.2018.10.015  
4  
5 2  
6  
7 3 36 Inaba Y, Chen JA, Bergmann SR. Prediction of future cardiovascular outcomes by flow-mediated  
8  
9 4 vasodilatation of brachial artery: a meta-analysis. *The international journal of cardiovascular imaging*  
10  
11 5 2010;**26**:631–40. doi:10.1007/s10554-010-9616-1  
12  
13 6  
14  
15 7 37 van Mil A, Pouwels S, Wilbrink J, *et al.* Carotid Artery Reactivity Predicts Events in Peripheral  
16  
17 8 Arterial Disease Patients. *Annals of Surgery* 2017. doi:10.1097/SLA.0000000000002558  
18  
19 9  
20  
21 10 38 Ashwell M, Gunn P, Gibson S. Waist-to-height ratio is a better screening tool than waist  
22  
23 11 circumference and BMI for adult cardiometabolic risk factors: systematic review and meta-analysis.  
24  
25 12 *Obesity reviews : an official journal of the International Association for the Study of Obesity*  
26  
27 13 2012;**13**:275–86. doi:10.1111/j.1467-789X.2011.00952.x  
28  
29 14  
30  
31 15 39 Paluska SA, Schwenk TL. Physical Activity and Mental Health. *Sports Med* 2000;**29**:167–80.  
32  
33 16 doi:10.2165/00007256-200029030-00003  
34  
35 17  
36  
37 18 40 Barnett K, Mercer SW, Norbury M, *et al.* Epidemiology of multimorbidity and implications for  
38  
39 19 health care, research, and medical education: a cross-sectional study. *Lancet* 2012;**380**:37–43.  
40  
41 20 doi:10.1016/s0140-6736(12)60240-2  
42  
43 21  
44  
45 22 41 Tennant R, Hiller L, Fishwick R, *et al.* The Warwick-Edinburgh Mental Well-being Scale  
46  
47 23 (WEMWBS): development and UK validation. *Health Qual Life Out* 2007;**5**:1–13. doi:10.1186/1477-  
48  
49 24 7525-5-63  
50  
51 25  
52  
53 26 42 Clausen J, Marott JL, Holtermann A, *et al.* Midlife Cardiorespiratory Fitness and the Long-Term  
54  
55  
56  
57  
58  
59  
60

- 1  
2  
3 1 Risk of Mortality 46 Years of Follow-Up. *J Am Coll Cardiol* 2018;**72**:987–95.  
4  
5 2 doi:10.1016/j.jacc.2018.06.045  
6  
7 3  
8  
9 4 43 Kodama S, Saito K, Tanaka S, *et al.* Cardiorespiratory fitness as a quantitative predictor of all-  
10 cause mortality and cardiovascular events in healthy men and women: a meta-analysis. *JAMA*  
11 5  
12 2009;**301**:2024–35. doi:10.1001/jama.2009.681  
13 6  
14 7  
15 8 44 Simmons R, Griffin S, Steele R, *et al.* Increasing overall physical activity and aerobic fitness is  
16 9 associated with improvements in metabolic risk: cohort analysis of the ProActive trial. *Diabetologia*  
17 10  
18 2008;**51**:787–94. doi:10.1007/s00125-008-0949-4  
19 11  
20 12 45 Department of Health. Start Active, Stay Active – A report on physical activity for health from the  
21 13 four home countries’ Chief Medical Officers. *London: Departmet of Health* 2011.  
22 14  
23 15 46 Berlin JE, Storti KL, Brach JS. Using Activity Monitors to Measure Physical Activity in Free-Living  
24 16 Conditions. *Physical Therapy* 2006;**86**:1137–45. doi:10.1093/ptj/86.8.1137  
25 17  
26 18 47 Strath SJ, Kaminsky LA, Ainsworth BE, *et al.* Guide to the assessment of physical activity: Clinical  
27 19 and research applications: a scientific statement from the American Heart Association. *Circulation*  
28 20  
29 2013;**128**:2259–79. doi:10.1161/01.cir.0000435708.67487.da  
30 21  
31 22 48 Morris S, Earl K. Health Survey for England 2016 Well-being and mental health. *Health and Social*  
32 23 *Care Information Centre* 2017.  
33 24  
34 25 49 Wade M, Mann S, Copeland RJ, *et al.* The effect of exercise referral schemes upon health and  
35 26 wellbeing: Initial observational insights using individual patient data meta-analysis from The National  
36  
37  
38  
39  
40  
41  
42  
43  
44  
45  
46  
47  
48  
49  
50  
51  
52  
53  
54  
55  
56  
57  
58  
59  
60



1  
2  
3 1 Referral database. doi:10.31236/osf.io/yebmr  
4

5 2  
6

7 3 50 Shah N, Cader M, Andrews WP, *et al.* Responsiveness of the Short Warwick Edinburgh Mental  
8 Well-Being Scale (SWEMWBS): evaluation a clinical sample. *Health and Quality of Life Outcomes*  
9 4 2018;**16**:239. doi:10.1186/s12955-018-1060-2  
10 5  
11 6  
12

13 7 51 Cavill N, Roberts K, Rutter H. Standard evaluation framework for physical activity interventions.  
14 8 Oxford: National Obesity Observatory 2012.  
15 9  
16

17 10 52 Craig P, Dieppe P, Macintyre S, *et al.* Developing and evaluating complex interventions: the new  
18 11 Medical Research Council guidance. *BMJ* 2008;**337**:a1655. doi:10.1136/bmj.a1655  
19 12  
20

21 13 53 Rutter H, Savona N, Glonti K, *et al.* The need for a complex systems model of evidence for public  
22 14 health. *Lancet* 2017;**17**:1267–9. doi:10.1016/S0140-6736  
23 15  
24

25 16 54 Beedie C, Mann S, Jimenez A, *et al.* Death by effectiveness: exercise as medicine caught in the  
26 17 efficacy trap! *Brit J Sport Med* 2015;**0**:1–2. doi:10.1136/bjsports-2014-094389  
27 18  
28

29 19 55 Perera R, Heneghan C, Yudkin P. Graphical method for depicting randomised trials of complex  
30 20 interventions. *BMJ* 2007;**334**:127. doi:10.1136/bmj.39045.396817.68  
31 21  
32  
33  
34  
35  
36  
37  
38  
39  
40  
41  
42  
43  
44  
45  
46  
47  
48  
49  
50  
51  
52  
53  
54  
55  
56  
57  
58  
59  
60

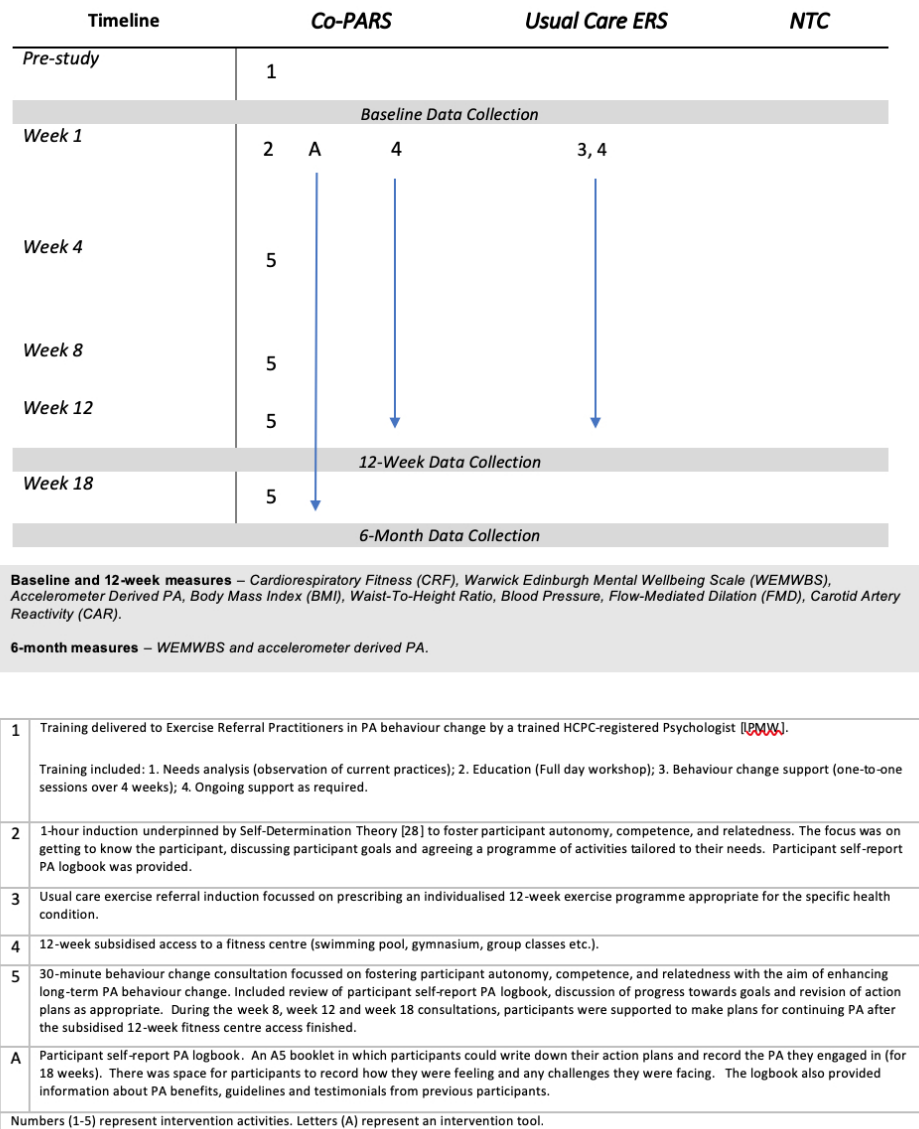

Figure 1. PaT Plot' describing intervention arm components.

**Co-produced PA referral scheme**  
Contacted (n= 53)



**BMJ Open  
Usual care exercise referral scheme**  
Contacted (n= 27)



**No-treatment control**  
Contacted (n= 20)



# TREND Statement Checklist

| Paper Section/Topic                                                 | Item No. | Descriptor                                                                                                                                                                                                                              | Reported? |      |
|---------------------------------------------------------------------|----------|-----------------------------------------------------------------------------------------------------------------------------------------------------------------------------------------------------------------------------------------|-----------|------|
|                                                                     |          |                                                                                                                                                                                                                                         | ✓         | Pg # |
| <b>TITLE and ABSTRACT</b>                                           |          |                                                                                                                                                                                                                                         |           |      |
| Title and Abstract                                                  | 1        | • Information on how units were allocated to interventions                                                                                                                                                                              | ✓         | 1,2  |
|                                                                     |          | • Structured abstract recommended                                                                                                                                                                                                       | ✓         | 2    |
|                                                                     |          | • Information on target population or study sample                                                                                                                                                                                      | ✓         | 2    |
| <b>INTRODUCTION</b>                                                 |          |                                                                                                                                                                                                                                         |           |      |
| Background                                                          | 2        | • Scientific background and explanation of rationale                                                                                                                                                                                    | ✓         | 4-5  |
|                                                                     |          | • Theories used in designing behavioral interventions                                                                                                                                                                                   | ✓         | 6    |
| <b>METHODS</b>                                                      |          |                                                                                                                                                                                                                                         |           |      |
| Participants                                                        | 3        | • Eligibility criteria for participants, including criteria at different levels in recruitment/sampling plan (e.g., cities, clinics, subjects)                                                                                          | ✓         | 5-6  |
|                                                                     |          | • Method of recruitment (e.g., referral, self-selection), including the sampling method if a systematic sampling plan was implemented                                                                                                   | ✓         | 5-6  |
|                                                                     |          | • Recruitment setting                                                                                                                                                                                                                   | ✓         | 6,7  |
|                                                                     |          | • Settings and locations where the data were collected                                                                                                                                                                                  | ✓         | 5-6  |
| Interventions                                                       | 4        | • Details of the interventions intended for each study condition and how and when they were actually administered, specifically including:                                                                                              | ✓         | 6-8  |
|                                                                     |          | ○ Content: what was given?                                                                                                                                                                                                              | ✓         | 6-8  |
|                                                                     |          | ○ Delivery method: how was the content given?                                                                                                                                                                                           | ✓         | 6-8  |
|                                                                     |          | ○ Unit of delivery: how were subjects grouped during delivery?                                                                                                                                                                          | ✓         | 6-8  |
|                                                                     |          | ○ Deliverer: who delivered the intervention?                                                                                                                                                                                            | ✓         | 6-8  |
|                                                                     |          | ○ Setting: where was the intervention delivered?                                                                                                                                                                                        | ✓         | 6-8  |
|                                                                     |          | ○ Exposure quantity and duration: how many sessions or episodes or events were intended to be delivered? How long were they intended to last?                                                                                           | ✓         | 6-8  |
|                                                                     |          | ○ Time span: how long was it intended to take to deliver the intervention to each unit?                                                                                                                                                 | ✓         | 6-8  |
| ○ Activities to increase compliance or adherence (e.g., incentives) |          | N/A                                                                                                                                                                                                                                     |           |      |
| Objectives                                                          | 5        | • Specific objectives and hypotheses                                                                                                                                                                                                    | ✓         | 5    |
| Outcomes                                                            | 6        | • Clearly defined primary and secondary outcome measures                                                                                                                                                                                | ✓         | 7-8  |
|                                                                     |          | • Methods used to collect data and any methods used to enhance the quality of measurements                                                                                                                                              | ✓         | 7-8  |
|                                                                     |          | • Information on validated instruments such as psychometric and biometric properties                                                                                                                                                    |           | N/A  |
| Sample size                                                         | 7        | • How sample size was determined and, when applicable, explanation of any interim analyses and stopping rules                                                                                                                           | ✓         | 8    |
| Assignment method                                                   | 8        | • Unit of assignment (the unit being assigned to study condition, e.g., individual, group, community)                                                                                                                                   |           | N/A  |
|                                                                     |          | • Method used to assign units to study conditions, including details of any restriction (e.g., blocking, stratification, minimization)                                                                                                  |           | N/A  |
|                                                                     |          | • Inclusion of aspects employed to help minimize potential bias induced due to non-randomization (e.g., matching)                                                                                                                       |           | N/A  |
| Blinding (masking)                                                  | 9        | • Whether or not participants, those administering the interventions, and those assessing the outcomes were blinded to study condition assignment; if so, statement regarding how the blinding was accomplished and how it was assessed |           | N/A  |
| Unit of Analysis                                                    | 10       | • Description of the smallest unit that is being analysed to assess intervention effects (e.g., individual, group, or community)                                                                                                        | ✓         | 8-9  |
|                                                                     |          | • If the unit of analysis differs from the unit of assignment, the analytical method used to account for this (e.g., adjusting the standard error estimates by the design effect or using multilevel analysis)                          |           | N/A  |
| Statistical methods                                                 | 11       | • Statistical methods used to compare study groups for primary methods outcome(s), including complex methods for correlated data                                                                                                        | ✓         | 8-9  |
|                                                                     |          | • Statistical methods used for additional analyses, such as subgroup analyses and adjusted analysis                                                                                                                                     | ✓         | 8-9  |
|                                                                     |          | • Methods for imputing missing data, if used                                                                                                                                                                                            |           | N/A  |

# TREND Statement Checklist

|                         |    |                                                                                                                                                                                                                                                                                                                                                                                                                                                                                                                                                                                                                                                                                                                                                                                                                                                                                                                                                                                                                                                                                     |   |       |
|-------------------------|----|-------------------------------------------------------------------------------------------------------------------------------------------------------------------------------------------------------------------------------------------------------------------------------------------------------------------------------------------------------------------------------------------------------------------------------------------------------------------------------------------------------------------------------------------------------------------------------------------------------------------------------------------------------------------------------------------------------------------------------------------------------------------------------------------------------------------------------------------------------------------------------------------------------------------------------------------------------------------------------------------------------------------------------------------------------------------------------------|---|-------|
|                         |    | <ul style="list-style-type: none"> <li>Statistical software or programs used</li> </ul>                                                                                                                                                                                                                                                                                                                                                                                                                                                                                                                                                                                                                                                                                                                                                                                                                                                                                                                                                                                             | ✓ | 8-9   |
| <b>RESULTS</b>          |    |                                                                                                                                                                                                                                                                                                                                                                                                                                                                                                                                                                                                                                                                                                                                                                                                                                                                                                                                                                                                                                                                                     |   |       |
| Participant flow        | 12 | <ul style="list-style-type: none"> <li>Flow of participants through each stage of the study: enrollment, assignment, allocation and intervention exposure, follow-up, analysis (a diagram is strongly recommended)               <ul style="list-style-type: none"> <li>Enrollment: the numbers of participants screened for eligibility, found to be eligible or not eligible, declined to be enrolled, and enrolled in the study</li> <li>Assignment: the numbers of participants assigned to a study condition</li> <li>Allocation and intervention exposure: the number of participants assigned to each study condition and the number of participants who received each intervention</li> <li>Follow-up: the number of participants who completed the follow-up or did not complete the follow-up (i.e., lost to follow-up), by study condition</li> <li>Analysis: the number of participants included in or excluded from the main analysis, by study condition</li> </ul> </li> <li>Description of protocol deviations from study as planned, along with reasons</li> </ul> | ✓ | 9     |
| Recruitment             | 13 | <ul style="list-style-type: none"> <li>Dates defining the periods of recruitment and follow-up</li> </ul>                                                                                                                                                                                                                                                                                                                                                                                                                                                                                                                                                                                                                                                                                                                                                                                                                                                                                                                                                                           | ✓ | 9     |
| Baseline data           | 14 | <ul style="list-style-type: none"> <li>Baseline demographic and clinical characteristics of participants in each study condition</li> <li>Baseline characteristics for each study condition relevant to specific disease prevention research</li> <li>Baseline comparisons of those lost to follow-up and those retained, overall and by study condition</li> <li>Comparison between study population at baseline and target population of interest</li> </ul>                                                                                                                                                                                                                                                                                                                                                                                                                                                                                                                                                                                                                      | ✓ | 10    |
| Baseline equivalence    | 15 | <ul style="list-style-type: none"> <li>Data on study group equivalence at baseline and statistical methods used to control for baseline differences</li> </ul>                                                                                                                                                                                                                                                                                                                                                                                                                                                                                                                                                                                                                                                                                                                                                                                                                                                                                                                      |   | N/A   |
| Numbers analyzed        | 16 | <ul style="list-style-type: none"> <li>Number of participants (denominator) included in each analysis for each study condition, particularly when the denominators change for different outcomes; statement of the results in absolute numbers when feasible</li> <li>Indication of whether the analysis strategy was "intention to treat" or, if not, description of how non-compliers were treated in the analyses</li> </ul>                                                                                                                                                                                                                                                                                                                                                                                                                                                                                                                                                                                                                                                     | ✓ | 10-13 |
| Outcomes and estimation | 17 | <ul style="list-style-type: none"> <li>For each primary and secondary outcome, a summary of results for each estimation study condition, and the estimated effect size and a confidence interval to indicate the precision</li> <li>Inclusion of null and negative findings</li> <li>Inclusion of results from testing pre-specified causal pathways through which the intervention was intended to operate, if any</li> </ul>                                                                                                                                                                                                                                                                                                                                                                                                                                                                                                                                                                                                                                                      | ✓ | 10    |
| Ancillary analyses      | 18 | <ul style="list-style-type: none"> <li>Summary of other analyses performed, including subgroup or restricted analyses, indicating which are pre-specified or exploratory</li> </ul>                                                                                                                                                                                                                                                                                                                                                                                                                                                                                                                                                                                                                                                                                                                                                                                                                                                                                                 |   | N/A   |
| Adverse events          | 19 | <ul style="list-style-type: none"> <li>Summary of all important adverse events or unintended effects in each study condition (including summary measures, effect size estimates, and confidence intervals)</li> </ul>                                                                                                                                                                                                                                                                                                                                                                                                                                                                                                                                                                                                                                                                                                                                                                                                                                                               | ✓ | 10    |
| <b>DISCUSSION</b>       |    |                                                                                                                                                                                                                                                                                                                                                                                                                                                                                                                                                                                                                                                                                                                                                                                                                                                                                                                                                                                                                                                                                     |   |       |
| Interpretation          | 20 | <ul style="list-style-type: none"> <li>Interpretation of the results, taking into account study hypotheses, sources of potential bias, imprecision of measures, multiplicative analyses, and other limitations or weaknesses of the study</li> <li>Discussion of results taking into account the mechanism by which the intervention was intended to work (causal pathways) or alternative mechanisms or explanations</li> <li>Discussion of the success of and barriers to implementing the intervention, fidelity of implementation</li> <li>Discussion of research, programmatic, or policy implications</li> </ul>                                                                                                                                                                                                                                                                                                                                                                                                                                                              | ✓ | 14-17 |
| Generalizability        | 21 | <ul style="list-style-type: none"> <li>Generalizability (external validity) of the trial findings, taking into account the study population, the characteristics of the intervention, length of follow-up, incentives, compliance rates, specific sites/settings involved in the study, and other contextual issues</li> </ul>                                                                                                                                                                                                                                                                                                                                                                                                                                                                                                                                                                                                                                                                                                                                                      | ✓ | 14-17 |
| Overall evidence        | 22 | <ul style="list-style-type: none"> <li>General interpretation of the results in the context of current evidence and current theory</li> </ul>                                                                                                                                                                                                                                                                                                                                                                                                                                                                                                                                                                                                                                                                                                                                                                                                                                                                                                                                       | ✓ | 14-17 |

From: Des Jarlais, D. C., Lyles, C., Crepaz, N., & the Trend Group (2004). Improving the reporting quality of nonrandomized evaluations of behavioral and public health interventions: The TREND statement. *American Journal of Public Health*, 94, 361-366. For more information, visit: <http://www.cdc.gov/trendstatement/>

# BMJ Open

## Pragmatic evaluation of a co-produced physical activity referral scheme: A UK quasi-experimental study

|                                 |                                                                                                                                                                                                                                                                                                                                                                                                                                                                                                                                                                                                                                                                                                                        |
|---------------------------------|------------------------------------------------------------------------------------------------------------------------------------------------------------------------------------------------------------------------------------------------------------------------------------------------------------------------------------------------------------------------------------------------------------------------------------------------------------------------------------------------------------------------------------------------------------------------------------------------------------------------------------------------------------------------------------------------------------------------|
| Journal:                        | <i>BMJ Open</i>                                                                                                                                                                                                                                                                                                                                                                                                                                                                                                                                                                                                                                                                                                        |
| Manuscript ID                   | bmjopen-2019-034580.R3                                                                                                                                                                                                                                                                                                                                                                                                                                                                                                                                                                                                                                                                                                 |
| Article Type:                   | Original research                                                                                                                                                                                                                                                                                                                                                                                                                                                                                                                                                                                                                                                                                                      |
| Date Submitted by the Author:   | 20-Jul-2020                                                                                                                                                                                                                                                                                                                                                                                                                                                                                                                                                                                                                                                                                                            |
| Complete List of Authors:       | Buckley, Benjamin; Liverpool John Moores University, Research Institute for Sport and Exercise Sciences<br>Thijssen, Dick; Liverpool John Moores University<br>Murphy, Rebecca; Liverpool John Moores University, Research Institute for Sport and Exercise Sciences<br>Graves, Lee; Liverpool John Moores University,<br>Cochrane, Madeleine; Liverpool John Moores University, Physical Activity Exchange<br>Gillison, Fiona; University of Bath, Department for Health<br>Crone, Diane; Cardiff Metropolitan University<br>Wilson, Philip; Brock University<br>Whyte, Greg; Liverpool John Moores University<br>Watson, Paula; Liverpool John Moores University, Research Institute for Sport and Exercise Sciences |
| <b>Primary Subject Heading</b>: | Sports and exercise medicine                                                                                                                                                                                                                                                                                                                                                                                                                                                                                                                                                                                                                                                                                           |
| Secondary Subject Heading:      | Public health, Cardiovascular medicine, Health services research, Rehabilitation medicine                                                                                                                                                                                                                                                                                                                                                                                                                                                                                                                                                                                                                              |
| Keywords:                       | Cardiovascular Health, Self-Determination Theory, Exercise Referral, Behaviour Change, Translational Research, VASCULAR MEDICINE                                                                                                                                                                                                                                                                                                                                                                                                                                                                                                                                                                                       |
|                                 |                                                                                                                                                                                                                                                                                                                                                                                                                                                                                                                                                                                                                                                                                                                        |

SCHOLARONE™  
Manuscripts



I, the Submitting Author has the right to grant and does grant on behalf of all authors of the Work (as defined in the below author licence), an exclusive licence and/or a non-exclusive licence for contributions from authors who are: i) UK Crown employees; ii) where BMJ has agreed a CC-BY licence shall apply, and/or iii) in accordance with the terms applicable for US Federal Government officers or employees acting as part of their official duties; on a worldwide, perpetual, irrevocable, royalty-free basis to BMJ Publishing Group Ltd ("BMJ") its licensees and where the relevant Journal is co-owned by BMJ to the co-owners of the Journal, to publish the Work in this journal and any other BMJ products and to exploit all rights, as set out in our [licence](#).

The Submitting Author accepts and understands that any supply made under these terms is made by BMJ to the Submitting Author unless you are acting as an employee on behalf of your employer or a postgraduate student of an affiliated institution which is paying any applicable article publishing charge ("APC") for Open Access articles. Where the Submitting Author wishes to make the Work available on an Open Access basis (and intends to pay the relevant APC), the terms of reuse of such Open Access shall be governed by a Creative Commons licence – details of these licences and which [Creative Commons](#) licence will apply to this Work are set out in our licence referred to above.

Other than as permitted in any relevant BMJ Author's Self Archiving Policies, I confirm this Work has not been accepted for publication elsewhere, is not being considered for publication elsewhere and does not duplicate material already published. I confirm all authors consent to publication of this Work and authorise the granting of this licence.

1  
2  
3  
4 1 **Pragmatic evaluation of a co-produced physical activity referral scheme: A UK quasi-**  
5  
6  
7 2 **experimental study**  
8  
9

10  
11 3 Benjamin J. R. Buckley<sup>a</sup>, Dick H. J. Thijssen<sup>a,e</sup>, Rebecca C. Murphy<sup>a</sup>, Lee E. F. Graves<sup>a</sup>,  
12 4 Madeleine Cochrane<sup>a</sup>, Fiona Gillison<sup>b</sup>, Diane Crone<sup>c</sup>, Philip M. Wilson<sup>d</sup>, Greg Whyte<sup>a</sup> and  
13 5 Paula M. Watson<sup>a</sup>  
14  
15

16 6  
17 7 <sup>a</sup> Research Institute for Sport and Exercise Sciences, Liverpool John Moores University,  
18 8 Liverpool, UK

19 9 <sup>b</sup> Department for Health, University of Bath, Bath, UK

20 10 <sup>c</sup> Cardiff School of Sport and Health Sciences, Cardiff Metropolitan University, UK

21 11 <sup>d</sup> Behavioural Health Sciences Research Lab, Department of Kinesiology, Brock University,  
22 12 Ontario, Canada

23 13 <sup>e</sup> Radboud Institute for Health Sciences, Department of Physiology, Radboud University  
24 14 Medical Center, Nijmegen, Netherlands  
25  
26

27 15  
28 16  
29 17 Correspondence to Dr Ben Buckley: B.J.Buckley@ljmu.ac.uk  
30  
31  
32  
33

34 18  
35  
36 19 Contributorship Statement  
37  
38

39 20 BJRБ contributed to the study design, data collection, data analysis, and preparation of the final  
40 21 document. PMW, DHJT, and RCM contributed to the study design, data analysis, and preparation of  
41 22 the final document. MC contributed to the data collection and approved the final version. LEFG, FG,  
42 23 DC, PW, and GW intellectually contributed to this paper and approved the final version.  
43  
44  
45  
46  
47  
48  
49  
50  
51  
52  
53  
54  
55  
56  
57  
58  
59  
60



1  
2  
3 1  
4  
5 2  
6 **Objectives.** UK exercise referral schemes (ERSs) have been criticised for focusing too much on exercise  
7 3 prescription and not enough on sustainable physical activity (PA) behaviour change. Previously, a  
8 4 theoretically-grounded intervention (Co-PARS) was co-produced to support long-term PA behaviour  
9 5 change in individuals with health conditions. The purpose of this study was to investigate the  
10 6 effectiveness of Co-PARS compared to a usual care ERS and no treatment for increasing  
11 7 cardiorespiratory fitness.  
12 8  
13 8 **Design.** A three-arm quasi-experimental trial.  
14 9  
15 9 **Setting.** Two leisure centres providing a) Co-PARS, b) usual exercise referral care, and one no-  
16 10 treatment control.  
17 11  
18 11 **Participants.** 68 adults with lifestyle-related health conditions (e.g. cardiovascular, diabetes,  
19 12 depression) were recruited to Co-PARS, usual care, or no treatment.  
20 13  
21 13 **Intervention.** 16-weeks of physical activity behaviour change support delivered at 4, 8, 12, and 18  
22 14 weeks, in addition to the usual care 12-week leisure centre access.  
23 15  
24 15 **Outcome measures.** Cardiorespiratory fitness, vascular health, PA, and mental wellbeing were  
25 16 measured at baseline, 12 weeks, and 6 months (PA and mental wellbeing only). Fitness centre  
26 17 engagement (Co-PARS and usual care) and behaviour change consultation attendance (Co-PARS) were  
27 18 assessed. Following an intention-to-treat approach, repeated-measures linear mixed models were  
28 19 used to explore intervention effects.  
29 20  
30 20 **Results.** Significant improvements in cardiorespiratory fitness ( $p=.002$ ) and vascular health ( $p=.002$ )  
31 21 were found in Co-PARS compared to usual care and no-treatment at 12 weeks. No significant changes  
32 22 in PA or wellbeing at 12 weeks or 6 months were noted. Intervention engagement was higher in Co-  
33 23 PARS than usual care, though this was not statistically significant.  
34 24  
35 24 **Conclusion.** A co-produced PA behaviour change intervention led to promising improvements in  
36 25 cardiorespiratory and vascular health at 12 weeks, despite no effect for PA levels at 12 weeks or 6  
37 26 months.  
38 27  
39 27  
40 28  
41 28 **Trial registration:** ClinicalTrials.gov: NCT03490747  
42 29  
43 29  
44 30  
45 30  
46 30  
47 30  
48 30  
49 30  
50 30  
51 30  
52 30  
53 30  
54 30  
55 30  
56 30  
57 30  
58 30  
59 30  
60 30

**Trial registration:** ClinicalTrials.gov: NCT03490747

**Keywords:** Cardiovascular Health; Self-Determination Theory; Exercise Referral; Behaviour Change Intervention; Translational Research.

## Strengths and limitations of the study

- This study advances the literature on exercise referral effectiveness by pragmatically evaluating a co-produced physical activity referral intervention, which was underpinned by multiple stakeholders and behaviour change theory.
- The study documents the third phase of a novel and iterative approach which co-produced, piloted, and then evaluated (this study) a physical activity referral intervention that was deemed feasible to implement in practice.
- Objective and subjective measures provide insight into the potential effects for patient health.
- It is not possible to directly attribute intervention effects to the phased co-production approach, although supported by the Medical Research Council.
- A larger sample size is needed to substantiate findings.

## Funding

This project was supported by a PhD studentship for Benjamin Buckley from Liverpool John Moores University. The 6-month data collection and analysis was supported by a financial grant from NHS Liverpool Clinical Commissioning Group (LCCG) RCF Award 2018/19.

## Competing interests

The authors declare that they have no competing interests.

## Authors' contributions

BJRB contributed to the study design, data collection, data analysis, and preparation of the final document. PMW, DHJT, and RCM contributed to the study design, data analysis, and preparation of the final document. MC contributed to the data collection and approved the final version. LEFG, FG, DC, PW, and GW intellectually contributed to this paper and approved the final version.

## Availability of data and materials

The datasets used and/or analysed during the current study are available from the corresponding author on reasonable request. Additional data were collected to investigate psychosocial processes of change, intervention fidelity and cost-effectiveness; due to space limitations they are not considered in the present manuscript, but findings can be obtained on request from [p.m.watson@ljmu.ac.uk](mailto:p.m.watson@ljmu.ac.uk).

## Word count

~3000

## Ethics approval and consent to participate

1  
2  
3 1 Full written consent was obtained from participants and the study was approved by NHS Research  
4  
5 2 Ethics Committee (REC: 18/NW/0039 - Project: 238547).

### 6 3 **Acknowledgements**

8 4 We would like to thank the participants in this study for their time, the delivery staff and centre  
9  
10 5 managers for their ongoing support, and the initial development group involved in the co-production  
11  
12 6 process.

### 13 7 14 8 **INTRODUCTION**

15  
16 9 Physical inactivity is the fourth leading cause of death worldwide and costs the UK an estimated £7.4  
17  
18 10 billion annually, including £0.9 billion to the NHS alone[1]. Exercise referral schemes (ERSs) provide a  
19  
20 11 promising framework to facilitate physical activity (PA) behaviour change in at-risk populations.  
21  
22 12 Typically, UK ERSs consist of a referral from a healthcare professional to a 12-16-week tailored exercise  
23  
24 13 programme provided by a qualified practitioner.

25  
26 14 There is inconsistent evidence as to the effectiveness of ERSs on PA behaviour, mental well-being,  
27  
28 15 quality of life, and physical health outcomes [2–4]. More recently, however, promising effects of ERSs  
29  
30 16 have been demonstrated in Wales [5], Sweden [6], and Spain [7] and a systematic review identified  
31  
32 17 promising effects of UK ERSs on self-reported PA and cardiovascular health markers [8]. Prior and  
33  
34 18 colleagues [9] demonstrated that for every 11 participants referred to a 24-week ERS, 1 participant  
35  
36 19 went on to report achieving  $\geq 90$  min/week of PA at 12-months. For perspective, it is estimated that  
37  
38 20 67-167 patients (categorised as  $\leq 10\%$  cardiovascular disease (CVD) risk) need to receive statin  
39  
40 21 treatment for 5 years to prevent one major vascular event [10]. Whilst we are not suggesting PA  
41  
42 22 behaviour change is a comparable outcome to a serious clinical event, it is notable that replacing 30  
43  
44 23 minutes of TV viewing time with PA across the UK population, could reduce premature mortality by  
45  
46 24 5-15%, depending on activity intensity [11]. The majority of studies evaluating ERSs, however, have  
47  
48 25 drawn on self-reported PA data and future studies employing device-based measures are needed to  
49  
50 26 substantiate these observations.

51  
52 27 Despite recent promise for the effectiveness of ERSs [7–9,12], substantial heterogeneity exists in both  
53  
54 28 design and delivery [13,14], reflecting varying assumptions on how best to promote health behaviour

1  
2  
3 1 change [15,16]. This limits potential scalability of 'successful' ERSs. Traditionally, ERSs have focussed  
4  
5 2 on short-term exercise prescription without appropriate evidence of effectiveness or underpinning of  
6  
7 3 behaviour change theory [17]. A recent attempt to integrate behaviour change theory into an ERS [18]  
8  
9 4 however, showed no advantage over a standard ERS at 12 weeks or 6 months. The authors noted  
10  
11 5 considerable implementation challenges when training staff, such as work-related demands that may  
12  
13 6 have reduced the importance of the theory-based training. It is plausible that delivery staff asked to  
14  
15 7 implement interventions designed by academics may lack ownership and feel less  
16  
17 8 motivated/competent. One potential way to promote ownership and engagement might be to adopt  
18  
19 9 a co-production approach, as a means of co-creating value across the public sector [19–21]. Though  
20  
21 10 not a panacea, the involvement of practitioners, managers and service-users in co-production has  
22  
23 11 potential to improve intervention relevance, fidelity, and effectiveness [22].  
24  
25 12 Previously, a theoretically-grounded PA referral scheme (Co-PARS) was co-produced by academics,  
26  
27 13 policy-makers, practitioners, and service-users [23] in Liverpool, UK, with a focus on supporting  
28  
29 14 sustainable PA behaviour change. Liverpool is the 3rd most deprived local authority in England and  
30  
31 15 has the 2nd highest proportion of Lower Super Output Areas (LSOAs) in the most deprived 10%  
32  
33 16 nationally [24]. Interventional work with at-risk patients is therefore critical and is aligned with the  
34  
35 17 concept of proportionate universalism [25]. Underpinned by self-determination theory [24], the co-  
36  
37 18 produced intervention differed from usual ERS care in its focus on PA behaviour change (rather than  
38  
39 19 exercise prescription), and inclusion of frequent one-to-one consultations with exercise referral  
40  
41 20 practitioners (compared to usual care which included formal contact at induction only). A pilot of Co-  
42  
43 21 PARS [26] showed clinically meaningful improvements in cardiorespiratory fitness (CRF) and PA,  
44  
45 22 although as we did not include a usual care control, it was unknown whether these effects were due  
46  
47 23 to the fact participants were taking part in an ERS or due to the unique elements of Co-PARS.  
48  
49 24 Furthermore, despite having very low CRF ( $<27.7 \text{ ml}\cdot\text{kg}^{-1}\cdot\text{min}^{-1}$ ) [26] we found 64% of the baseline pilot  
50  
51 25 sample were meeting the PA guidelines [27] of at least 150 minutes moderate-intensity PA per week  
52  
53 26 (measured objectively via accelerometry). This suggested CRF may be a more appropriate primary  
54  
55  
56  
57  
58  
59  
60

1  
2  
3 1 outcome measure than PA for this low-fit population (whilst changing PA behaviour was the focus of  
4  
5 2 the intervention, a target health outcome of this behaviour change was improved CRF). The pilot also  
6  
7 3 allowed the opportunity to investigate delivery processes, and we noted several areas that required  
8  
9 4 refinement in preparation for a controlled trial. These refinements included, increasing the number  
10  
11 5 of behaviour change consultations from four to five; enhanced focus on daily PA opportunities (rather  
12  
13 6 than focussing on activities offered at the fitness centre); adapting staff timetables to promote  
14  
15 7 consistency of care and to allow participant one-to-one consultations to take place in a private room;  
16  
17 8 and reducing practitioner paperwork. Building on our previous pilot work, the aim of the current study  
18  
19 9 was to investigate the effectiveness of Co-PARS compared to a usual care ERS and a no-treatment  
20  
21 10 control on change in cardiorespiratory fitness (CRF) at 12 weeks and PA and wellbeing at 6 months.

## 11 **METHODS**

### 12 **Study Design**

13 A three-arm quasi-experimental trial involving: 1. Co-PARS (delivered at fitness centre A); 2. usual care  
14  
15 14 ERS (delivered at fitness centre B); and 3. no-treatment control. This paper reports trial outcomes  
16  
17 15 (CRF, vascular health, PA, mental wellbeing) measured at baseline, 12 weeks, and 6 months (PA and  
18  
19 16 mental wellbeing only). Additional data were collected to investigate psychosocial processes of  
20  
21 17 change, intervention fidelity and cost-effectiveness; due to space limitations they are not considered  
22  
23 18 in the present manuscript, but findings can be obtained on request from [p.m.watson@ljmu.ac.uk](mailto:p.m.watson@ljmu.ac.uk). Full  
24  
25 19 written consent was obtained from participants and the study was approved by NHS Research Ethics  
26  
27 20 Committee (REC: 18/NW/0039 - Project: 238547) and registered on ClinicalTrials.gov (NCT03490747).

### 21 **Patient and Public Involvement**

22 The intervention was previously co-produced, piloted, and adapted with substantial service user input  
23  
24 23 [23,26]. In summary, this process involved several iterative development workshop with  
25  
26 24 commissioners, managers, service providers, service users, and researchers to develop a Co-PARS  
27  
28 25 framework. This co-production process resulted in an intervention framework that was designed to

1 be implemented within existing infrastructures. A subsequent pilot study explored the preliminary  
2 health impact and acceptability of Co-PARS. Findings from this pilot phase informed adaptations to  
3 Co-PARS that allowed for improved intervention feasibility, prior to conducting the present trial.

#### 4 **Participants and Recruitment**

5 Inclusion criteria were the same for all three conditions (Co-PARS, usual care, no-treatment).  
6 Participants were eligible if aged  $\geq 18$  years with a health-related risk factor (e.g. hypertension,  
7 hyperglycaemia, obesity) and/or health condition (e.g. diabetes, cardiovascular disease, depression)  
8 that may be alleviated by increasing PA levels. Participants with uncontrolled health conditions, severe  
9 psychological or neurological conditions were excluded. Participants for the Co-PARS and usual care  
10 arms were recruited from fitness centre A (Co-PARS) and fitness centre B (usual care) respectively  
11 (where they had been referred for exercise by a health professional). Reception staff at both centres  
12 provided study information and gained consent to pass participant details to the researcher.  
13 Participants for the no-treatment control were recruited via posters, electronic invitations, and email  
14 communications primarily at the university site. Participants were not eligible for the no-treatment  
15 control if they were currently attending an exercise referral scheme. Interested participants for all  
16 groups were sent an information sheet and baseline data collection was arranged.

#### 17 **Study Arms**

18 Intervention arm components are presented in Figure 1.

19 **Usual care exercise referral scheme (ERS – centre B).** Usual care followed a standard ERS model of 12-  
20 week subsidised access to a fitness centre (swimming, gym, group classes). Participants met an  
21 exercise referral practitioner for an initial, 1-hour induction (week 1) during which a 12-week exercise  
22 programme was provided for the participant. Any further contact with a practitioner was informal and  
23 opportunistic. This system was already in place and was considered usual care for the local area.  
24 Centre B was chosen as a comparison centre due to its similarity in referral numbers and socio-  
25 economic make-up of the local population to centre A (where Co-PARS was being delivered). For

1  
2  
3 1 example, based on areas within Liverpool ranked from 1 (most deprived) to 30 (least deprived), usual  
4  
5 2 care ERS and Co-PARS were ranked respectively: 20th and 21st (income), 20th and 21st (employment),  
6  
7 3 22nd and 24th (Education) and 10th and 11th (living environment).  
8  
9

#### 10 4 ***Co-produced PA referral scheme (Co-PARS – centre A)***

11  
12  
13 5 Participants received the same 12-week subsidised access to a fitness centre as usual care plus a series  
14  
15 6 of one-to-one behaviour change consultations (60-minute induction followed by 30-minute  
16  
17 7 consultations at weeks 4, 8, 12 and 18). A log book was provided for each participant to set action  
18  
19 8 plans, log progress and facilitate consultation discussions. Consultations were delivered by exercise  
20  
21 9 referral practitioners in an autonomy supportive counselling style, drawing on the principles of self-  
22  
23 10 determination theory [28]. This additional support aimed to encourage habitual opportunities to  
24  
25 11 increase PA as well as activities available at the fitness centre. A full description of the theoretical  
26  
27 12 underpinning and behaviour change intervention components is available elsewhere [23].  
28  
29  
30  
31 13 Prior to the pilot of Co-PARS [26] practitioners received training in self-determination theory-based  
32  
33 14 communication strategies led by a sport and exercise psychologist (last author [PMW]), involving a  
34  
35 15 workshop, one-to-one sessions and follow-up group meetings. Following the pilot, a further series of  
36  
37 16 group meetings involving exercise referral practitioners and the research team were held to develop  
38  
39 17 aspects of delivery that required refinement (as outlined in the introduction). Full details of the  
40  
41 18 training are available from [p.m.watson@ljmu.ac.uk](mailto:p.m.watson@ljmu.ac.uk).  
42  
43  
44

45 19 ***No-treatment control (NTC).*** Participants received a lifestyle advice booklet only (offered to all study  
46  
47 20 arms at baseline data collection), based on national guidance for PA, nutrition, smoking cessation and  
48  
49 21 alcohol consumption.  
50  
51

52  
53 22 [INSERT FIGURE 1 SOMEWHERE HERE]  
54  
55

56 23

#### 57 24 **Outcome measures**

1 **Primary outcome: Cardio-respiratory fitness (CRF).** Maximal oxygen consumption ( $VO_{2max}^{-2}$ ) was  
2 estimated via the sub-maximal Astrand-Rhyming cycle ergometer protocol [29]. The protocol is a  
3 single-stage cycling test designed to elicit a steady-state heart rate over a period of ~6 minutes.

4 **Accelerometer-derived PA.** Tri-axial ActiGraph GT3x accelerometers (ActiGraph, Pensacola, FL, USA)  
5 measured PA for 7 days, which have been validated in a comparable population [30]. Raw triaxial  
6 acceleration values were converted into an omnidirectional measure of acceleration, referred to as  
7 Euclidian norm minus one [31]. Minimum wear time was 10 hours per day and 3 days per week  
8 including one weekend day [32]. The R package GGIR [31] facilitated extraction of user-defined  
9 acceleration thresholds: 5.9 to 69.1 mg for light-intensity PA [33], 69.1 to 258.7 mg as moderate and  
10 >258.7 mg as vigorous-intensity PA [34].

11 **Vascular health.** Our previous work has demonstrated carotid artery reactivity (CAR) may be a  
12 promising outcome variable to assess in PA interventions for at-risk populations [35]. Further,  
13 endothelial function may provide prognostic value beyond that of traditional risk factors [36] with an  
14 increase of 1% in brachial artery flow-mediated dilation (FMD) associated with a 12-15% lower risk of  
15 CV events [33,34]. FMD and CAR were measured using ultrasound techniques [35]. Both techniques  
16 measure vascular endothelial function and have independently predicted future risk of cardiovascular  
17 events in humans [36,37]. Blood pressure was measured in the supine position using an automated  
18 blood pressure device (Omron Healthcare UK Limited, Milton Keynes, UK).

19 **Anthropometric measures.** Since obesity is a critical risk factor for poor health and cardiovascular  
20 disease, anthropometric variables were measured to investigate potential intervention effects on  
21 body mass. Waist-to-height ratio is a stronger predictor of early health risk than Body Mass Index  
22 (BMI) alone [38], therefore we collected both BMI (mass in kg / stature in  $m^2$ ) and waist-to-height  
23 ratio (waist circumference / stature).

24 **Mental wellbeing.** As PA is known to enhance mental wellbeing [39] and clinical populations are more  
25 susceptible to mental ill-health [40], it was important to identify whether Co-PARS led to any changes



1 in mental health (positive or negative). Mental wellbeing was measured using the 14-item Warwick-  
 2 Edinburgh Mental Well-being Scale (WEMWBS; [41], which asks participants to rate their  
 3 psychological wellbeing (e.g. "I've been feeling cheerful") over the previous 2 weeks (measured on a  
 4 likert scale of 1 (none of the time) to 5 (all of the time)).

5 *Fitness centre engagement (Co-PARS and usual care only).* The number of occasions participants  
 6 attended the fitness centre between baseline and 12 weeks (weekly attendance) and 12 weeks to 6  
 7 months (monthly attendance) was obtained from computerised attendance records. When  
 8 measuring intervention engagement it was deemed inappropriate to calculate the mean number of  
 9 sessions per week, since this could exaggerate the engagement of individuals who attended with  
 10 high frequency in the early weeks then dropped out (when compared with individuals who attended  
 11 moderately but consistently for the full 12 weeks). Therefore a formula was used to calculate a  
 12 percentage for '12-week engagement' (based on the recommended bi-weekly attendance):

$$\left( \frac{((n1*0.5) + (n2) + (n3*1.2))}{12} \right) * 100$$

n1 = number of weeks in which participant attends once only  
 n2 = number of weeks in which participant attends twice  
 n3 = number of weeks in which participant attends three or more times

18 This formula took into account both *frequency* and *consistency* of attendance to yield a percentage  
 19 score that ranged from 0% (no attendance) to 120% (attendance of three or more times per week  
 20 for the whole 12 weeks).

21 Monthly attendance post-12 weeks was calculated as a mean attendance across months 4 to 6,  
 22 therefore did not take consistency of attendance into account.

23 *Behaviour change consultation attendance (Co-PARS only).* The number of consultations offered and  
 24 attended were measured by exercise referral practitioners at induction, 4, 8, 12, and 18 weeks.

## 25 **Sample size**

1 Sample size was determined to detect a meaningful difference in CRF at 12 weeks based on our pilot  
2 results [26]. To detect a difference of  $2 \text{ ml}\cdot\text{kg}^{-1}\cdot\text{min}^{-1}$  between Co-PARS and usual care, 42 participants  
3 were required per arm ( $f= .25$ ,  $p= .05$ , power = .80). To detect a difference of  $3.2 \text{ ml}\cdot\text{kg}^{-1}\cdot\text{min}^{-1}$  between  
4 the intervention arms and the no-treatment control, 17 participants were required for the no-  
5 treatment control ( $f= .5$ ,  $p= .05$ , power = .80). Thus, a total sample of 101 participants were required.

## 6 **Statistical analyses**

7 An intention-to-treat approach was used assuming no change in non-respondents (last observation  
8 carried forward) to produce a conservative estimate of intervention effects. Delta changes ( $\Delta$ ) from  
9 pre- to post-intervention were calculated for each group and entered as the dependent variable in  
10 repeated measures linear mixed model analyses. A random intercept model was used with fixed  
11 effects for study arm (Co-PARS, usual care ERS, no-treatment control) and time (baseline-to-week-12  
12 change, week-12-to-6-month change, and baseline-to-6-month change) and participants included as  
13 random effects. Least squared difference (LSD) was used for post hoc testing. Testing for baseline  
14 differences to identify covariates was avoided, as this method has been demonstrated to inflate bias,  
15 instead pre-intervention was entered into the model as a covariate. Furthermore, all linear mixed  
16 model analyses were repeated with age and employment as covariates as a comparison to the results  
17 presented in this study (with baseline score as a covariate) due to their known prognostic value. Using  
18 age and employment as covariates resulted in no change in inferences presented in this study. One-  
19 way ANOVAs were used to compare baseline values between intervention arms. Fitness centre  
20 engagement was determined as described above. Behaviour change consultation attendance is  
21 presented descriptively. For non-normally distributed data, median and interquartile range is  
22 presented and within group median change was calculated via Wilcoxon signed-rank tests.

## 23 **RESULTS**

24 *Participants.* 68 participants provided baseline data, 56 of whom provided 12-week data, and 58 of  
25 whom provided 6-month data (figure 2).

1 **Baseline characteristics (table 1).** No significant differences were noted between arms for age, sex,  
 2 ethnicity, BMI, referral reason, or accelerometer-derived PA levels ( $p>.05$ ). Full-time employment  
 3 status ( $p=.001$ ) and CRF ( $p=.015$ ) were significantly higher in the control compared to usual care and  
 4 Co-PARS. Smoking status was significantly higher in usual care compared to Co-PARS and control  
 5 ( $p=.010$ ). Mental wellbeing was significantly lower in Co-PARS compared to control ( $p=.023$ ).

6  
 7 [INSERT FIGURE 2 SOMEWHERE HERE]  
 8  
 9

**Table 1.** Baseline characteristics presented as Mean  $\pm$  SD or % (n) of group.

|                                                    | Co-produced PA referral<br>(n=33) | Usual care ERS<br>(n=19) | No-treatment control<br>(n=16) | Between arm<br>p-value |
|----------------------------------------------------|-----------------------------------|--------------------------|--------------------------------|------------------------|
| Age (years)                                        | 57 $\pm$ 12                       | 53 $\pm$ 16              | 48 $\pm$ 15                    | $p=.319$               |
| Female (% of sample)                               | 58 (19)                           | 47 (9)                   | 56 (9)                         | $p=.774$               |
| White British (% of sample)                        | 82 (27)                           | 95 (18)                  | 75 (12)                        | $p=.132$               |
| Full-time employment (% of sample)                 | 18 (6)                            | 26 (5)                   | 62 (10)                        | $p=.001$               |
| Never smoked (% of sample)                         | 73 (24)                           | 37 (7)                   | 81 (13)                        | $p=.002$               |
| Body mass index (kg/m <sup>2</sup> )               | 31 $\pm$ 7                        | 33 $\pm$ 6               | 29 $\pm$ 6                     | $p=.226$               |
| Systolic blood pressure (mmHg)                     | 131 $\pm$ 11                      | 138 $\pm$ 18             | 123 $\pm$ 12                   | $p=.010$               |
| Primary referral reason / health concern (control) |                                   |                          |                                | $p=.132$               |
| Cardiometabolic (% of sample)                      | 67 (22)                           | 43 (8)                   | 62 (10)                        | -                      |
| Cancer (% of sample)                               | 6 (2)                             | 5 (1)                    | 6 (1)                          | -                      |
| Mental Health (% of sample)                        | 18 (6)                            | 26 (5)                   | 19 (3)                         | -                      |

|                                          |         |          |         |          |
|------------------------------------------|---------|----------|---------|----------|
| Musculoskeletal (% of sample)            | 9 (3)   | 26 (5)   | 13 (2)  | -        |
| Comorbidity (% of sample)                | 85 (28) | 100 (19) | 81 (13) | $p=.166$ |
| Meeting the PA guidelines (% of sample)* | 73 (22) | 71 (10)  | 93 (13) | $p=.223$ |

*P-values* represent between arm baseline effects. There was no between arm effect for referral reason, thus no between arm *p-values* are provided for referral reason sub groups.  
 \*Chief Medical Officers' 2019 physical activity guidelines: 150 minutes of moderate-intensity physical activity per week.

### Baseline-to-12-Week effects

Raw outcome values are presented for baseline, week 12, and 6 months in Table 2. There was a significant effect for study arm in baseline-to-12-week change in CRF ( $p=.002$ ). Post hoc testing revealed a significantly higher CRF change in Co-PARS (2.4) compared to the ERS (0.3;  $p=.021$ ) and control (-0.6;  $p=.001$ ), but no difference between the ERS and control ( $p=.314$ ). A significant effect for study arm was found in change in FMD% ( $p=.002$ ), with FMD% change significantly higher in Co-PARS (2.4) compared to control (-1.1;  $p=.001$ ) but not the ERS (0.8;  $p=.099$ ). The change in FMD% was not significantly different between the ERS and control ( $p=.71$ ). No statistically significant study arm effects were noted for changes in CAR%, blood pressure, resting heart rate, anthropometric measures, PA or WEMWBS at 12 weeks ( $p>.05$ ).

### Baseline-to-6-month effects

No statistically significant study arm effects were noted for change in WEMWBS or PA at 6 months ( $p>.05$ ).

### Fitness centre engagement (Co-PARS and usual care ERS) and consultation attendance (Co-PARS only).

Table 3 reports the participant fitness centre engagement data for the Co-PARS and usual care ERS. Although not statistically significant, Co-PARS engagement was 9% higher, participants attended the

1  
2  
3  
4  
5  
6  
7  
8  
9  
10  
11  
12  
13  
14  
15  
16  
17  
18  
19  
20  
21  
22  
23  
24  
25  
26  
27  
28  
29  
30  
31  
32  
33  
34  
35  
36  
37  
38  
39  
40  
41  
42  
43  
44  
45  
46  
47  
48  
49  
50  
51  
52  
53  
54  
55  
56  
57  
58  
59  
60

- 1 fitness centre on average 3 times more per month, and 23% more participants were attending the
- 2 fitness centre beyond 6-months follow-up compared to usual care. Co-PARS behaviour change
- 3 consultation attendance is reported in Table 4.
- 4

For peer review only

**Table 2.** Cardiometabolic health outcomes and PA levels at baseline, 12 weeks, 6 months, and between arm baseline-to 12-week or 6-month effect. All variables are presented as Mean  $\pm$  SD.

|                                   | Co-PARS         |                 |              | Usual Care ERS  |                |               | No-Treatment Control |                 |             | Between arm effect <i>p</i> -value <sup>(a)</sup> |
|-----------------------------------|-----------------|-----------------|--------------|-----------------|----------------|---------------|----------------------|-----------------|-------------|---------------------------------------------------|
|                                   | Baseline        | Week 12         | 6 Month      | Baseline        | Week 12        | 6 Month       | Baseline             | Week 12         | 6 Month     |                                                   |
| <b>Fitness (n=56)</b>             |                 |                 |              |                 |                |               |                      |                 |             |                                                   |
| <i>CRF</i> $ml.kg^{-1}min^{-1}$   | 22.2 $\pm$ 7    | 24.6 $\pm$ 7    | -            | 23.3 $\pm$ 6.6  | 23.6 $\pm$ 7   | -             | 29.6 $\pm$ 9.2       | 28.9 $\pm$ 8.7  | -           | <i>p</i> =.002                                    |
| <b>Physical Activity</b>          |                 |                 |              |                 |                |               |                      |                 |             |                                                   |
| <b>GT3x (n= 61) Mins.day</b>      |                 |                 |              |                 |                |               |                      |                 |             |                                                   |
| <i>Light intensity</i>            | 90 $\pm$ 52     | 98 $\pm$ 64     | 107 $\pm$ 75 | 98 $\pm$ 36     | 93 $\pm$ 31    | 158 $\pm$ 145 | 90 $\pm$ 37          | 101 $\pm$ 33    | 86 $\pm$ 40 | <i>p</i> =.332                                    |
| <i>Moderate intensity</i>         | 44 $\pm$ 32     | 42 $\pm$ 29     | 42 $\pm$ 33  | 43 $\pm$ 28     | 43 $\pm$ 30    | 55 $\pm$ 55   | 60 $\pm$ 31          | 65 $\pm$ 24     | 54 $\pm$ 21 | <i>p</i> =.260                                    |
| <i>Vigorous intensity</i>         | 1 $\pm$ 3       | 1 $\pm$ 2       | 1 $\pm$ 2    | 1 $\pm$ 2       | 1 $\pm$ 1      | 1 $\pm$ 2     | 2 $\pm$ 4            | 2 $\pm$ 3       | 3 $\pm$ 8   | <i>p</i> =.108                                    |
| <b>Vascular Ultrasound (n=64)</b> |                 |                 |              |                 |                |               |                      |                 |             |                                                   |
| <i>CAR%</i>                       | 1.7 $\pm$ 2.7   | 2.8 $\pm$ 2.2   | -            | 2.7 $\pm$ 1.8   | 3.9 $\pm$ 2.8  | -             | 2.5 $\pm$ 2.7        | 1.7 $\pm$ 2.7   | -           | <i>p</i> =.073                                    |
| <i>CAR Baseline</i> $cm$          | 0.69 $\pm$ 0.07 | 0.69 $\pm$ 0.06 | -            | 0.69 $\pm$ 0.08 | 0.7 $\pm$ 0.09 | -             | 0.65 $\pm$ 0.07      | 0.64 $\pm$ 0.06 | -           | <i>p</i> =.130                                    |
| <i>FMD%</i>                       | 4.4 $\pm$ 2.3   | 6.8 $\pm$ 2.7   | -            | 4.2 $\pm$ 2     | 5 $\pm$ 2.1    | -             | 6.2 $\pm$ 2.1        | 5.2 $\pm$ 2.8   | -           | <i>p</i> =.002                                    |
| <i>FMD Baseline</i> $cm$          | 0.39 $\pm$ 0.07 | 0.38 $\pm$ 0.06 | -            | 0.39 $\pm$ 0.09 | 0.41 0.08      | -             | 0.38 $\pm$ 0.08      | 0.37 $\pm$ 0.06 | -           | <i>p</i> =.728                                    |
| <b>Cardiometabolic (n=68)</b>     |                 |                 |              |                 |                |               |                      |                 |             |                                                   |
| <i>BMI</i> $kg.m^2$               | 31 $\pm$ 7      | 30 $\pm$ 7      | -            | 33 $\pm$ 6      | 32 $\pm$ 6     | -             | 29 $\pm$ 6           | 29 $\pm$ 6      | -           | <i>p</i> =.323                                    |
| <i>WHR</i>                        | 62 $\pm$ 9      | 61 $\pm$ 10     | -            | 64 $\pm$ 8      | 63 $\pm$ 8     | -             | 56 $\pm$ 9           | 56 $\pm$ 9      | -           | <i>p</i> =.261                                    |
| <i>SBP</i> $mmHg$                 | 131 $\pm$ 11    | 127 $\pm$ 12    | -            | 138 $\pm$ 18    | 132 $\pm$ 15   | -             | 123 $\pm$ 12         | 118 $\pm$ 13    | -           | <i>p</i> =.937                                    |
| <i>DBP</i> $mmHg$                 | 73 $\pm$ 7      | 71 $\pm$ 8      | -            | 73 $\pm$ 9      | 71 $\pm$ 11    | -             | 72 $\pm$ 11          | 68 $\pm$ 10     | -           | <i>p</i> =.584                                    |
| <i>RHR</i> $bpm$                  | 70 $\pm$ 10     | 65 $\pm$ 10     | -            | 70 $\pm$ 12     | 68 $\pm$ 11    | -             | 66 $\pm$ 12          | 63 $\pm$ 9      | -           | <i>p</i> =.540                                    |
| <b>Mental Wellbeing (n=68)</b>    |                 |                 |              |                 |                |               |                      |                 |             |                                                   |
| WEMWBS                            | 46 $\pm$ 9      | 51 $\pm$ 10     | 48 $\pm$ 10  | 49 $\pm$ 10     | 52 $\pm$ 11    | 50 $\pm$ 13   | 53 $\pm$ 9           | 56 $\pm$ 9      | 53 $\pm$ 10 | <i>p</i> =.796                                    |

Co-PARS, Co-produced PA referral scheme; ERS, Exercise referral scheme; CRF, Cardiorespiratory Fitness; GT3x, Accelerometer; CAR, Carotid artery reactivity; FMD, Flow-mediated dilation; BMI, Body Mass Index; WHR, Waist-to-Height ratio; SBP, Systolic blood pressure; DBP, Diastolic blood pressure; RHR, Resting heart rate, WEMWBS, Warwick-Edinburgh Mental Wellbeing Scale

<sup>a</sup> *F*-statistic for between arm baseline-to-6-month change or baseline-to-week 12 change if variable not collected at 6 months.

Missing data was due to inability to complete the CRF test (*n*=12), inability to complete the vascular ultrasound protocols (*n*=4), and insufficient accelerometer wear time or non-return (*n*=7).

**Table 3.** Fitness centre engagement.

|                                                                                                 | Co-PARS | Usual Care | Between centre difference |
|-------------------------------------------------------------------------------------------------|---------|------------|---------------------------|
|                                                                                                 | (n=33)  | (n=19)     |                           |
| % Engagement <sup>a</sup> (Mean ± SD)                                                           | 42±29   | 33±27      | p=.267                    |
| Number of fitness centre visits (per person per month) week 12 to 6 months (Med, IQR)           | 3(0-14) | 0 (0-1)    | p=.072                    |
| % of baseline sample who attended fitness centre at least once beyond 6 months (% of sample, n) | 39 (13) | 16 (3)     | p=.101                    |

<sup>a</sup>Based on the formula  $((n1*0.5)+(n2)+(n3*1.2))/12 * 100$ ; n1=number of weeks in which participant attends once only; n2=number of weeks in which participant attends twice; n3=number of weeks in which participant attends three or more times. <sup>a</sup>**Engagement**; based on a recommended attendance of twice weekly, a formula was used to calculate a percentage for "12-week engagement", which took into account both frequency and consistency of attendance (see methods).

**Table 4.** Co-PARS behaviour change consultation attendance (based on baseline sample of 33 participants).

| Consultation | % Booked (n) | % Attended (n) |
|--------------|--------------|----------------|
| Induction    | 91(30)       | 93(28)         |
| Week 4       | 82(27)       | 78(21)         |
| Week 8       | 67(22)       | 91(20)         |
| Week 12      | 64(21)       | 81(17)         |
| Week 18      | 55(18)       | 50(9)          |

## 1 DISCUSSION

2 This was the first study to investigate the effectiveness of a theoretically-grounded, co-produced PA  
3 referral scheme (Co-PARS) compared to a usual care ERS and no treatment. Despite challenges in  
4 recruitment that meant the study was statistically underpowered, the findings demonstrated  
5 significant and clinically meaningful improvements in CRF and vascular health in Co-PARS compared  
6 to the usual care and no treatment. No statistically significant effects were noted for accelerometer-  
7 derived PA levels or mental wellbeing at 12-weeks or 6-months.

8 The effect of usual care ERSs compared to theoretically-grounded interventions on CRF has not been  
9 previously explored. We observed a significant increase in CRF in Co-PARS compared to usual care and  
10 a no-treatment control. According to values reported by Clausen *et al.* [42] both Co-PARS (22 ml.kg.<sup>-1</sup>  
11 min<sup>-1</sup>) and usual care (23 ml.kg.<sup>-1</sup>min<sup>-1</sup>) participants were below the lower limit of 'healthy' (27.7  
12 ml.kg.<sup>-1</sup>min<sup>-1</sup>) for baseline CRF [43]. As low CRF is associated with a substantially elevated risk of all-  
13 cause mortality [43], the magnitude of change demonstrated in Co-PARS (2.4 ml.kg.<sup>-1</sup>min<sup>-1</sup>) may be  
14 clinically meaningful. For example, in at-risk populations, relatively small magnitudes ( $\leq 1$  ml.kg.<sup>-1</sup>min<sup>-1</sup>  
15 <sup>1</sup>) have been shown to significantly reduce clustered cardiometabolic risk [44]. Thus, Co-PARS was  
16 effective at improving CRF in individuals with low CRF by a clinically meaningful amount.

17 Promising improvements in vascular health were also noted in the Co-PARS group, with brachial artery  
18 FMD significantly improved compared to usual care and control arms. Although CAR was not  
19 statistically different between arms, both Co-PARS and usual care demonstrated a potentially  
20 meaningful within-arm improvement compared with no treatment, which exhibited a deterioration in  
21 vascular health. Such improvements in vascular measures may have prognostic implications. For  
22 example, a 1% increase in FMD has been suggested to reduce the future risk of CVD events by 13%  
23 [36].

24 Despite low baseline CRF, a substantial percentage of Co-PARS (73%) and usual care (71%) participants  
25 were meeting the Department of Health [45] guidelines of 150 minutes of moderate-intensity PA per



1 week. We observed a similar finding in our pilot [26] and subsequently raised the question as to the use of PA guidelines to assess eligibility for ERSs (NICE, 2014), as it appears from our data that individuals classified as “physically active” can still be very unfit and therefore can benefit from ERSs in terms of improved fitness and cardiometabolic health. A further discrepancy was noted in the lack of change in PA levels in Co-PARS, despite improved CRF. It is possible measurement issues contributed to this discrepancy. Accelerometers can measure certain types of PA such as walking, running, and stair climbing [46]. They may not, however, sufficiently identify activities typical of an ERS delivered within a fitness centre environment (e.g. cycling, resistance training, circuits, swimming). Given Co-PARS had higher (albeit non-significant) fitness centre engagement compared to usual care, it is possible PA changes occurred that were not detected by the accelerometry data. Consideration therefore needs to be given to the appropriateness of accelerometers to measure PA in ERSs. Alternative methods such as heart-rate monitors combined with self-report data may be worthy of consideration, although further work would be required to develop standardized data collection and analysis protocols (taking into account the limitations of each of these methods if used in isolation [47]). Researchers are therefore urged to consider CRF as a primary outcome in ERSs until appropriate alternative methods of measuring PA behaviour are developed. Ultimately, it is not clear why the increase in fitness occurred without a corresponding change in PA and further research is required to elucidate the relationship between PA and fitness in this population.

In addition to physiological health outcomes, we found baseline mental wellbeing to be below the national average (score of 50) in both Co-PARS (46) and usual care (49), but not the control (53) [48]. Despite no significant between-group effect for mental wellbeing, within-group changes at 12 weeks were deemed clinically meaningful for Co-PARS (5) and usual care (3) but not in the no treatment control. It is notable that the post-intervention magnitude of change observed in mental wellbeing for Co-PARS (5) was larger than that observed in a meta-analysis encompassing >23,000 participants across 13 different ERSs (3), which were comparable in nature to the usual care ERS in this study [49].

1  
2  
3 1 From the 6-month data it appeared the scheme was not effective at promoting *sustained* PA behaviour  
4  
5 2 change or mental wellbeing improvements. It must be noted, however, that the wellbeing levels were  
6  
7 3 still higher than baseline and even small magnitudes of change (1-3) may be meaningful in clinical  
8  
9 4 populations [50]. As discussed earlier, it may be that measuring PA using the methods described in  
10  
11 5 this study prevented the identification of activities typical of a fitness centre environment. This notion  
12  
13 6 is supported by the post-week-12 attendance data, which highlighted Co-PARS participants were  
14  
15 7 regularly attending the fitness centre whereas the usual care participants were not. Challenges of  
16  
17 8 maintaining sustained health outcomes post-ERSs have been highlighted elsewhere [3]. And whilst a  
18  
19 9 recent systematic review reported longer length schemes (>20 weeks) may be more effective than  
20  
21 10 shorter schemes [8], the four long ERSs (20-26 weeks) collected pre-post data only. Thus we do not  
22  
23 11 know if longer length ERSs result in enhanced health outcomes *post intervention* compared with  
24  
25 12 shorter schemes. To determine if longer length schemes are indeed more effective, longer-term  
26  
27 13 follow-up data collection is required, ideally at 6 and 12 months post intervention [51].  
28  
29  
30  
31  
32

33 14 Through a phased approach we have assessed the effectiveness of Co-PARS resulting from several  
34  
35 15 years of co-production. Whilst the effects of co-production are difficult to isolate, a comparison of  
36  
37 16 results at different stages of intervention refinement suggests the phased development approach had  
38  
39 17 some positive effects. Unpublished engagement data from centre A in 2014-2015 (when the centre  
40  
41 18 was running a usual care ERS) shows that engagement improved after the introduction of Co-PARS  
42  
43 19 (42% vs 28% in 2014-2015), whereas engagement reduced in the usual care centre over the same  
44  
45 20 period (32% vs 37% in 2014-2015). Furthermore, consultation attendance for Co-PARS in the current  
46  
47 21 study was substantially higher than in our previous pilot (54% attended induction plus  $\geq 3$  behaviour  
48  
49 22 change consultations, vs 9% in the pilot [26]), which may have been a reflection of refinements made  
50  
51 23 to the intervention after the pilot (e.g. improved focus on holistic PA, improved monitoring  
52  
53 24 procedures, improved continuity of instructors). These improvements in engagement highlight the  
54  
55 25 importance of allowing time for complex interventions to develop [52], and are particularly promising  
56  
57 26 given the effectiveness of ERSs are highly dependent on participant adherence [5,21]. Furthermore,  
58  
59  
60

1  
2  
3 1 this study has demonstrated how investing in the “bottom-up” development of an intervention can  
4  
5 2 lead to an effective and sustainable model. We therefore support the arguments of Rutter and  
6  
7 3 colleagues [53] in that a shift in thinking is needed, instead of asking whether an intervention works  
8  
9 4 to fix a problem, researchers should aim to identify if and how it contributes to reshaping a system in  
10  
11 5 a favourable way. As such, we propose the co-production and implementation process may be as  
12  
13 6 important as the scheme content itself.  
14  
15

### 17 **Methodological considerations**

18  
19  
20 8 This is the first known study to investigate the effectiveness of a co-produced PA referral scheme (Co-  
21  
22 9 PARS) in comparison to usual care and a no-treatment control. Our novel approach addresses an  
23  
24 10 important gap in the sport and exercise medicine literature [54], in that we employed rigorous  
25  
26 11 laboratory-based instruments to measure health outcomes that can be achieved through an  
27  
28 12 ecologically valid, “real-world” intervention. We observed a very high retention at 6-month follow up,  
29  
30 13 which may be due in part to the fact many of the participants were retired (and therefore may have  
31  
32 14 more available time). It is possible also that the high retention was facilitated by the co-production  
33  
34 15 process, which involved ongoing relationships between the research and delivery teams (and  
35  
36 16 therefore helped with the logistics of returning accelerometers for the co-PARS and usual care  
37  
38 17 groups). Whilst this paper highlights many strengths of co-production, we do not wish to present co-  
39  
40 18 production as a panacea [19] and it is important potential challenges and costs are considered prior  
41  
42 19 to undertaking such an approach [21,22].  
43  
44  
45  
46  
47

48 20 We must acknowledge some limitations of the study. Whilst there is a need for high-quality RCTs of  
49  
50 21 theoretically informed approaches to PA behaviour change [3], several pragmatic reasons meant an  
51  
52 22 RCT approach was not appropriate for the present study. Firstly, it was important participants could  
53  
54 23 choose the most convenient fitness centre. Secondly, it was important we continued work with the  
55  
56 24 same fitness centre and staff (following co-production [23] and pilot [26] phases) in order to develop  
57  
58 25 the intervention to the point where it was deemed to have a worthwhile effect [52]. A pragmatic  
59  
60

1  
2  
3 1 research approach was therefore deemed most appropriate to evaluate Co-PARS with high ecological  
4  
5 2 validity. Pragmatic constraints (e.g. fitness centre refurbishments, staff illness) did however mean the  
6  
7 3 required sample size was not achieved, thus inferences of effectiveness need to be taken with caution.  
8  
9 4 This is particularly true for the PA data, where the relatively high variability (compared with CRF) may  
10  
11 5 have contributed to the lack of change observed in PA in this study. It is recommended future work  
12  
13 6 considers pragmatic risks and contingencies when planning recruitment and plans sufficient time to  
14  
15 7 cope with recruitment delays. For pragmatic reasons, not all outcomes were collected at 6-months  
16  
17 8 follow-up and further research is needed to collect long-term, objective health data following PA  
18  
19 9 referral schemes. Finally, it must be noted that while the trial registration appears to be retrospective  
20  
21 10 (April 6<sup>th</sup> 2018), the initial submission was several months prior to this (January 11<sup>th</sup> 2018). Final sign-  
22  
23 11 off was delayed due to capacity issues within the research team.  
24  
25  
26  
27  
28

## 29 **CONCLUSION**

30  
31  
32 13 A co-produced, theoretically-grounded PA referral scheme (Co-PARS) led to improved CRF and  
33  
34 14 vascular health in at-risk individuals when compared to usual care and no treatment. In addition,  
35  
36 15 clinically meaningful improvements in vascular health and mental wellbeing were observed at 12-  
37  
38 16 weeks in both Co-PARS and usual care, but not the no treatment control group. Of note, PA remained  
39  
40 17 unchanged at 12-weeks and 6-months follow-up. Adopting a phased approach has enabled multi-  
41  
42 18 stakeholder input and ongoing intervention refinement, resulting in an intervention that showed  
43  
44 19 promising effects on engagement and clinically meaningful improvements to participant health.  
45  
46  
47  
48  
49  
50  
51  
52  
53  
54  
55  
56  
57  
58  
59  
60

1  
2  
3  
4  
5  
6  
7  
8  
9  
10  
11  
12  
13  
14  
15  
16  
17  
18  
19  
20  
21  
22  
23  
24  
25  
26  
27  
28  
29  
30  
31  
32  
33  
34  
35  
36  
37  
38  
39  
40  
41  
42  
43  
44  
45  
46  
47  
48  
49  
50  
51  
52  
53  
54  
55  
56  
57  
58  
59  
60

1 **Figure Legends**

2 **Figure 1.** 'PaT Plot' describing intervention arm components.[55]

3 **Figure 2.** Participant flow diagram within the three study arms (March 2018-January 2019).

4

5

6

7

8

9

10

11

12

13

14

15

16

17

18

19

For peer review only

## 1      1      **References**

- 2  
3  
4  
5  
6      2      1 Public Health England. Physical activity: applying All Our Health. 2019.  
7  
8  
9      3  
10  
11      4      2 Dugdill L, Graham RC, McNair F. Exercise referral: the public health panacea for physical activity  
12  
13      5      promotion? A critical perspective of exercise referral schemes; their development and evaluation.  
14  
15      6      *Ergonomics* 2005;**48**:1390–410. doi:10.1080/00140130500101544  
16  
17      7  
18  
19      8      3 Pavey T, Taylor A, Fox K, *et al.* Effect of exercise referral schemes in primary care on physical  
20  
21      9      activity and improving health outcomes: systematic review and meta-analysis. *Bmj* 2011;**343**:d6462.  
22  
23      10      doi:10.1136/bmj.d6462  
24  
25      11  
26  
27      12      4 Pavey T, Anokye N, Taylor A, *et al.* The clinical effectiveness and cost-effectiveness of exercise  
28  
29      13      referral schemes: a systematic review and economic evaluation. *Health technology assessment*  
30  
31      14      (*Winchester, England*) 2011;**15**:i–xii, 1–254. doi:10.3310/hta15440  
32  
33      15  
34  
35      16      5 Murphy SM, Edwards RT, Williams N, *et al.* An evaluation of the effectiveness and cost  
36  
37      17      effectiveness of the National Exercise Referral Scheme in Wales, UK: a randomised controlled trial of  
38  
39      18      a public health policy initiative. *Journal of epidemiology and community health* 2012;**66**:745–53.  
40  
41      19      doi:10.1136/jech-2011-200689  
42  
43      20  
44  
45      21      6 Onerup A, Arvidsson D, Blomqvist Å, *et al.* Physical activity on prescription in accordance with the  
46  
47      22      Swedish model increases physical activity: a systematic review. *Br J Sports Med* 2018;;:bjsports-2018-  
48  
49      23      099598. doi:10.1136/bjsports-2018-099598  
50  
51      24  
52  
53      25      7 Martín-Borràs C, Giné-Garriga M, Puig-Ribera A, *et al.* A new model of exercise referral scheme in  
54  
55      26      primary care: is the effect on adherence to physical activity sustainable in the long term? A 15-

- 1  
2  
3 1 month randomised controlled trial. *BMJ Open* 2018;**8**:e017211. doi:10.1136/bmjopen-2017-017211  
4  
5 2  
6  
7 3 8 Rowley N, Mann S, Steele J, *et al.* The effects of exercise referral schemes in the United Kingdom in  
8 those with cardiovascular, mental health, and musculoskeletal disorders: a preliminary systematic  
9  
10 4 review. *BMC Public Health* 2018;**18**:949. doi:10.1186/s12889-018-5868-9  
11  
12 5  
13  
14 6  
15  
16 7 9 Prior F, Coffey M, Robins A, *et al.* Long-Term Health Outcomes Associated With an Exercise  
17 Referral Scheme: An Observational Longitudinal Follow-Up Study. *Journal of Physical Activity and*  
18  
19 8 *Health* 2019;**1**–6. doi:10.1123/jpah.2018-0442  
20  
21 9  
22  
23 10  
24  
25 11 10 Taylor F, Huffman MD, Macedo A, *et al.* Statins for the primary prevention of cardiovascular  
26 disease. *Cochrane Db Syst Rev* 2013;**1**:CD004816. doi:10.1002/14651858.cd004816.pub5  
27  
28 12  
29  
30 13  
31  
32 14 11 Wijndaele K, Sharp SJ, Wareham NJ, *et al.* Mortality Risk Reductions from Substituting Screen  
33 Time by Discretionary Activities. *Med Sci Sport Exer* 2017;**49**:1111–9.  
34  
35 15  
36 16 doi:10.1249/mss.0000000000001206  
37  
38  
39 17  
40  
41 18 12 Craike M, Wiesner G, Enticott J, *et al.* Equity of a government subsidised exercise referral scheme:  
42 A population study. *Social Science & Medicine* Published Online First: 2018.  
43  
44 19  
45 20 doi:10.1016/j.socscimed.2018.09.023  
46  
47  
48 21  
49  
50 22 13 Craig A, Dinan S, Smith A, *et al.* Exercise Referral Systems: A National Quality Assurance  
51 Framework. *Department of Health: London* Published Online First: 2001.discovery.ucl.ac.uk  
52  
53 23  
54  
55 24  
56  
57 25 14 Pavey T, Taylor A, Hillsdon M, *et al.* Levels and predictors of exercise referral scheme uptake and  
58 adherence: a systematic review. *J Epidemiol Commun H* 2012;**66**:737–44. doi:10.1136/jech-2011-  
59  
60

- 1  
2  
3 1 200354  
4  
5 2  
6  
7  
8 3 15 Littlecott HJ, Moore GF, Moore L, *et al.* Psychosocial mediators of change in physical activity in  
9  
10 4 the Welsh national exercise referral scheme: secondary analysis of a randomised controlled trial.  
11  
12 5 *International Journal of Behavioral Nutrition and Physical Activity* 2014;**11**:1–11.  
13  
14 6 doi:10.1186/s12966-014-0109-9  
15  
16 7  
17  
18 8 16 Hanson CL, Oliver EJ, Dodd-Reynolds CJ, *et al.* How do participant experiences and characteristics  
19  
20 9 influence engagement in exercise referral? A qualitative longitudinal study of a scheme in  
21  
22 10 Northumberland, UK. *Bmj Open* 2019;**9**:e024370. doi:10.1136/bmjopen-2018-024370  
23  
24 11  
25  
26 12 17 Sowden S, Raine R. Running along parallel lines: how political reality impedes the evaluation of  
27  
28 13 public health interventions. A case study of exercise referral schemes in England. *Journal of*  
29  
30 14 *epidemiology and community health* 2008;**62**:835–841. doi:10.1136/jech.2007.069781  
31  
32 15  
33  
34 16 18 Duda JL, Williams GC, Ntoumanis N, *et al.* Effects of a standard provision versus an autonomy  
35  
36 17 supportive exercise referral programme on physical activity, quality of life and well-being indicators:  
37  
38 18 a cluster randomised controlled trial. *The international journal of behavioral nutrition and physical*  
39  
40 19 *activity* 2014;**11**:10. doi:10.1186/1479-5868-11-10  
41  
42 20  
43  
44 21 19 Ostrom E. Crossing the great divide: Coproduction, synergy, and development. *World*  
45  
46 22 *Development* 1996;**24**:1073–87. doi:10.1016/0305-750x(96)00023-x  
47  
48 23  
49  
50 24 20 Clarke D, Jones F, Harris R, *et al.* What outcomes are associated with developing and  
51  
52 25 implementing co-produced interventions in acute healthcare settings? A rapid evidence synthesis.  
53  
54 26 *BMJ open* 2017;**7**:e014650. doi:10.1136/bmjopen-2016-014650  
55  
56  
57  
58  
59  
60



1  
2  
3  
4  
5  
6  
7  
8  
9  
10  
11  
12  
13  
14  
15  
16  
17  
18  
19  
20  
21  
22  
23  
24  
25  
26  
27  
28  
29  
30  
31  
32  
33  
34  
35  
36  
37  
38  
39  
40  
41  
42  
43  
44  
45  
46  
47  
48  
49  
50  
51  
52  
53  
54  
55  
56  
57  
58  
59  
60

1  
2  
3  
4  
5  
6  
7  
8  
9  
10  
11  
12  
13  
14  
15  
16  
17  
18  
19  
20  
21  
22  
23  
24  
25  
26  
27  
28  
29  
30  
31  
32  
33  
34  
35  
36  
37  
38  
39  
40  
41  
42  
43  
44  
45  
46  
47  
48  
49  
50  
51  
52  
53  
54  
55  
56  
57  
58  
59  
60

21 Farrance C, Tsofliou F, Clark C. Adherence to community based group exercise interventions for older people: A mixed-methods systematic review. *Preventive medicine* 2016;**87**:155–66.

doi:10.1016/j.ypmed.2016.02.037

22 Rycroft-Malone J, Burton CR, Bucknall T, *et al.* Collaboration and Co-Production of Knowledge in Healthcare: Opportunities and Challenges. *International journal of health policy and management* 2016;**5**:221–3. doi:10.15171/ijhpm.2016.08

23 Buckley B, Thijssen D, Murphy R, *et al.* Making a move in exercise referral: co-development of a physical activity referral scheme. *Journal of Public Health* Published Online First: 2018.

doi:10.1093/pubmed/fdy072

24 The English indices of deprivation 2019. 2019.

25 Carey G, Crammond B, Leeuw E. Towards health equity: a framework for the application of proportionate universalism. *Int J Equity Health* 2015;**14**:81. doi:10.1186/s12939-015-0207-6

26 Buckley BJ, Thijssen DH, Murphy RC, *et al.* Preliminary effects and acceptability of a co-produced physical activity referral intervention. *Health Educ J* 2019;:001789691985332.

doi:10.1177/0017896919853322

27 Department of Health & Social Care. UK Chief Medical Officers' Physical Activity Guidelines. 2019.

28 Ryan R, Deci E. Self-determination theory and the facilitation of intrinsic motivation, social development, and well-being. *The American psychologist* 2000;**55**:68–78.

- 1  
2  
3 1  
4  
5 2 29 Astrand I. Aerobic work capacity in men and women with special reference to age. *Acta*  
6  
7 3 *physiologica Scandinavica Supplementum* 1960;**49**:1–92.  
8  
9 4  
10  
11 5 30 Kelly LA, McMillan DG, Anderson A, *et al.* Validity of actigraphs uniaxial and triaxial  
12  
13 6 accelerometers for assessment of physical activity in adults in laboratory conditions. *BMC Medical*  
14  
15 7 *Physics* 2013;**13**:1–7. doi:10.1186/1756-6649-13-5  
16  
17 8  
18  
19 9 31 Hees VT, Gorzelniak L, Leon E, *et al.* Separating movement and gravity components in an  
20  
21 10 acceleration signal and implications for the assessment of human daily physical activity. *PLoS one*  
22  
23 11 2013;**8**:e61691. doi:10.1371/journal.pone.0061691  
24  
25 12  
26  
27 13 32 Matthews CE, Hagströmer M, Pober DM, *et al.* Best Practices for Using Physical Activity Monitors  
28  
29 14 in Population-Based Research. *Medicine & Science in Sports & Exercise* 2012;**44**:S68.  
30  
31 15 doi:10.1249/MSS.0b013e3182399e5b  
32  
33 16  
34  
35 17 33 Bakrania K, Yates T, Rowlands AV, *et al.* Intensity Thresholds on Raw Acceleration Data: Euclidean  
36  
37 18 Norm Minus One (ENMO) and Mean Amplitude Deviation (MAD) Approaches. *PLOS ONE*  
38  
39 19 2016;**11**:e0164045. doi:10.1371/journal.pone.0164045  
40  
41 20  
42  
43 21 34 Hilded M, Hees Vt, Hansen B, *et al.* Age Group Comparability of Raw Accelerometer Output from  
44  
45 22 Wrist- and Hip-Worn Monitors. *Medicine & Science in Sports & Exercise* 2014;**46**:1816.  
46  
47 23 doi:10.1249/mss.0000000000000289  
48  
49 24  
50  
51 25 35 Buckley B, Watson PM, Murphy RC, *et al.* Carotid artery function is restored in subjects with  
52  
53 26 elevated cardiovascular disease risk following a 12-week physical activity intervention. *Canadian*  
54  
55  
56  
57  
58  
59  
60

- 1  
2  
3 1 *Journal of Cardiology* Published Online First: 2018. doi:10.1016/j.cjca.2018.10.015  
4  
5 2  
6  
7 3 36 Inaba Y, Chen JA, Bergmann SR. Prediction of future cardiovascular outcomes by flow-mediated  
8  
9  
10 4 vasodilatation of brachial artery: a meta-analysis. *The international journal of cardiovascular imaging*  
11  
12 5 2010;**26**:631–40. doi:10.1007/s10554-010-9616-1  
13  
14 6  
15  
16 7 37 van Mil A, Pouwels S, Wilbrink J, *et al.* Carotid Artery Reactivity Predicts Events in Peripheral  
17  
18 8 Arterial Disease Patients. *Annals of Surgery* 2017. doi:10.1097/SLA.0000000000002558  
19  
20 9  
21  
22  
23 10 38 Ashwell M, Gunn P, Gibson S. Waist-to-height ratio is a better screening tool than waist  
24  
25 11 circumference and BMI for adult cardiometabolic risk factors: systematic review and meta-analysis.  
26  
27 12 *Obesity reviews : an official journal of the International Association for the Study of Obesity*  
28  
29 13 2012;**13**:275–86. doi:10.1111/j.1467-789X.2011.00952.x  
30  
31 14  
32  
33  
34 15 39 Paluska SA, Schwenk TL. Physical Activity and Mental Health. *Sports Med* 2000;**29**:167–80.  
35  
36 16 doi:10.2165/00007256-200029030-00003  
37  
38  
39 17  
40  
41 18 40 Barnett K, Mercer SW, Norbury M, *et al.* Epidemiology of multimorbidity and implications for  
42  
43 19 health care, research, and medical education: a cross-sectional study. *Lancet* 2012;**380**:37–43.  
44  
45 20 doi:10.1016/s0140-6736(12)60240-2  
46  
47  
48 21  
49  
50 22 41 Tennant R, Hiller L, Fishwick R, *et al.* The Warwick-Edinburgh Mental Well-being Scale  
51  
52 23 (WEMWBS): development and UK validation. *Health Qual Life Out* 2007;**5**:1–13. doi:10.1186/1477-  
53  
54 24 7525-5-63  
55  
56  
57 25  
58  
59 26 42 Clausen J, Marott JL, Holtermann A, *et al.* Midlife Cardiorespiratory Fitness and the Long-Term  
60

- 1  
2  
3 1 Risk of Mortality 46 Years of Follow-Up. *J Am Coll Cardiol* 2018;**72**:987–95.  
4  
5 2 doi:10.1016/j.jacc.2018.06.045  
6  
7 3  
8  
9  
10 4 43 Kodama S, Saito K, Tanaka S, *et al.* Cardiorespiratory fitness as a quantitative predictor of all-  
11  
12 5 cause mortality and cardiovascular events in healthy men and women: a meta-analysis. *JAMA*  
13  
14 6 2009;**301**:2024–35. doi:10.1001/jama.2009.681  
15  
16 7  
17  
18 8 44 Simmons R, Griffin S, Steele R, *et al.* Increasing overall physical activity and aerobic fitness is  
19  
20 9 associated with improvements in metabolic risk: cohort analysis of the ProActive trial. *Diabetologia*  
21  
22 10 2008;**51**:787–94. doi:10.1007/s00125-008-0949-4  
23  
24 11  
25  
26 12 45 Department of Health. Start Active, Stay Active – A report on physical activity for health from the  
27  
28 13 four home countries’ Chief Medical Officers. *London: Departmet of Health* 2011.  
29  
30 14  
31  
32 15 46 Berlin JE, Storti KL, Brach JS. Using Activity Monitors to Measure Physical Activity in Free-Living  
33  
34 16 Conditions. *Physical Therapy* 2006;**86**:1137–45. doi:10.1093/ptj/86.8.1137  
35  
36 17  
37  
38 18 47 Strath SJ, Kaminsky LA, Ainsworth BE, *et al.* Guide to the assessment of physical activity: Clinical  
39  
40 19 and research applications: a scientific statement from the American Heart Association. *Circulation*  
41  
42 20 2013;**128**:2259–79. doi:10.1161/01.cir.0000435708.67487.da  
43  
44 21  
45  
46 22 48 Morris S, Earl K. Health Survey for England 2016 Well-being and mental health. *Health and Social*  
47  
48 23 *Care Information Centre* 2017.  
49  
50 24  
51  
52 25 49 Wade M, Mann S, Copeland RJ, *et al.* The effect of exercise referral schemes upon health and  
53  
54 26 wellbeing: Initial observational insights using individual patient data meta-analysis from The National  
55  
56  
57  
58  
59  
60

- 1  
2  
3 1 Referral database. doi:10.31236/osf.io/yebmr  
4  
5 2  
6  
7 3 50 Shah N, Cader M, Andrews WP, *et al.* Responsiveness of the Short Warwick Edinburgh Mental  
8  
9  
10 4 Well-Being Scale (SWEMWBS): evaluation a clinical sample. *Health and Quality of Life Outcomes*  
11  
12 5 2018;**16**:239. doi:10.1186/s12955-018-1060-2  
13  
14 6  
15  
16 7 51 Cavill N, Roberts K, Rutter H. Standard evaluation framework for physical activity interventions.  
17  
18 8 Oxford: National Obesity Observatory 2012.  
19  
20 9  
21  
22  
23 10 52 Craig P, Dieppe P, Macintyre S, *et al.* Developing and evaluating complex interventions: the new  
24  
25 11 Medical Research Council guidance. *BMJ* 2008;**337**:a1655. doi:10.1136/bmj.a1655  
26  
27 12  
28  
29  
30 13 53 Rutter H, Savona N, Glonti K, *et al.* The need for a complex systems model of evidence for public  
31  
32 14 health. *Lancet* 2017;**17**:1267–9. doi:10.1016/S0140-6736  
33  
34 15  
35  
36 16 54 Beedie C, Mann S, Jimenez A, *et al.* Death by effectiveness: exercise as medicine caught in the  
37  
38 17 efficacy trap! *Brit J Sport Med* 2015;**0**:1–2. doi:10.1136/bjsports-2014-094389  
39  
40 18  
41  
42  
43 19 55 Perera R, Heneghan C, Yudkin P. Graphical method for depicting randomised trials of complex  
44  
45 20 interventions. *BMJ* 2007;**334**:127. doi:10.1136/bmj.39045.396817.68  
46  
47  
48  
49 21  
50  
51  
52  
53  
54  
55  
56  
57  
58  
59  
60

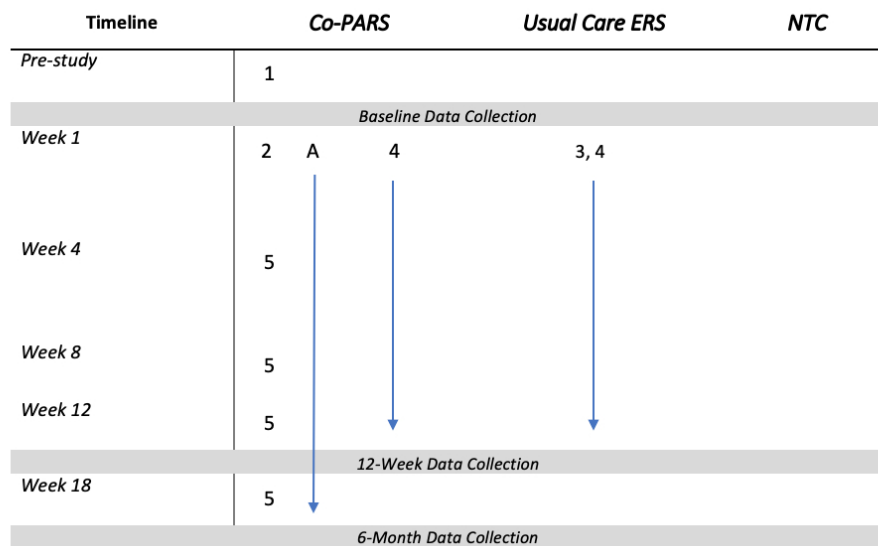

**Baseline and 12-week measures** – Cardiorespiratory Fitness (CRF), Warwick Edinburgh Mental Wellbeing Scale (WEMWBS), Accelerometer Derived PA, Body Mass Index (BMI), Waist-To-Height Ratio, Blood Pressure, Flow-Mediated Dilatation (FMD), Carotid Artery Reactivity (CAR).

**6-month measures** – WEMWBS and accelerometer derived PA.

|   |                                                                                                                                                                                                                                                                                                                                                                                                                                                                                                  |
|---|--------------------------------------------------------------------------------------------------------------------------------------------------------------------------------------------------------------------------------------------------------------------------------------------------------------------------------------------------------------------------------------------------------------------------------------------------------------------------------------------------|
| 1 | Training delivered to Exercise Referral Practitioners in PA behaviour change by a trained HCPC-registered Psychologist [PMW].<br>Training included: 1. Needs analysis (observation of current practices); 2. Education (Full day workshop); 3. Behaviour change support (one-to-one sessions over 4 weeks); 4. Ongoing support as required.                                                                                                                                                      |
| 2 | 1-hour induction underpinned by Self-Determination Theory [28] to foster participant autonomy, competence, and relatedness. The focus was on getting to know the participant, discussing participant goals and agreeing a programme of activities tailored to their needs. Participant self-report PA logbook was provided.                                                                                                                                                                      |
| 3 | Usual care exercise referral induction focussed on prescribing an individualised 12-week exercise programme appropriate for the specific health condition.                                                                                                                                                                                                                                                                                                                                       |
| 4 | 12-week subsidised access to a fitness centre (swimming pool, gymnasium, group classes etc.).                                                                                                                                                                                                                                                                                                                                                                                                    |
| 5 | 30-minute behaviour change consultation focussed on fostering participant autonomy, competence, and relatedness with the aim of enhancing long-term PA behaviour change. Included review of participant self-report PA logbook, discussion of progress towards goals and revision of action plans as appropriate. During the week 8, week 12 and week 18 consultations, participants were supported to make plans for continuing PA after the subsidised 12-week fitness centre access finished. |
| A | Participant self-report PA logbook. An A5 booklet in which participants could write down their action plans and record the PA they engaged in (for 18 weeks). There was space for participants to record how they were feeling and any challenges they were facing. The logbook also provided information about PA benefits, guidelines and testimonials from previous participants.                                                                                                             |

Numbers (1-5) represent intervention activities. Letters (A) represent an intervention tool.

Figure 1. PaT Plot’ describing intervention arm components.

Contacted (n= 53)

1  
2  
3  
4 → Declined to participate / did not respond (n= 20)  
5  
6

7 Attended baseline testing (n= 33)  
8  
9

10  
11 Co-PARS  
12

13  
14 → Lost to follow up (n= 4)  
15  
16  
17

18 Completed week-12 testing (n= 27)  
19  
20

21  
22 Completed 6-month testing (n= 28)  
23

24  
25  
26 Included in analyses following  
27 intention-to-treat protocol (n= 33)  
28  
29

Contacted (n= 27)

→ Declined to participate / did not respond (n= 8)

Attended baseline testing (n= 19)

Usual care ERS

→ Lost to follow up (n= 4)

Completed week-12 testing (n= 15)

Completed 6-month testing (n= 16)

Included in analyses following  
intention-to-treat protocol (n= 19)

Contacted (n= 20)

→ Declined to participate / did not respond (n= 4)

Attended baseline testing (n= 16)

No treatment

→ Lost to follow up (n= 2)

Completed week-12 testing (n= 14)

Completed 6-month testing (n= 14)

Included in analyses following  
intention-to-treat protocol (n= 16)

# TREND Statement Checklist

| Paper Section/Topic                                                 | Item No. | Descriptor                                                                                                                                                                                                                              | Reported? |      |
|---------------------------------------------------------------------|----------|-----------------------------------------------------------------------------------------------------------------------------------------------------------------------------------------------------------------------------------------|-----------|------|
|                                                                     |          |                                                                                                                                                                                                                                         | ✓         | Pg # |
| <b>TITLE and ABSTRACT</b>                                           |          |                                                                                                                                                                                                                                         |           |      |
| Title and Abstract                                                  | 1        | • Information on how units were allocated to interventions                                                                                                                                                                              | ✓         | 1,2  |
|                                                                     |          | • Structured abstract recommended                                                                                                                                                                                                       | ✓         | 2    |
|                                                                     |          | • Information on target population or study sample                                                                                                                                                                                      | ✓         | 2    |
| <b>INTRODUCTION</b>                                                 |          |                                                                                                                                                                                                                                         |           |      |
| Background                                                          | 2        | • Scientific background and explanation of rationale                                                                                                                                                                                    | ✓         | 4-5  |
|                                                                     |          | • Theories used in designing behavioral interventions                                                                                                                                                                                   | ✓         | 6    |
| <b>METHODS</b>                                                      |          |                                                                                                                                                                                                                                         |           |      |
| Participants                                                        | 3        | • Eligibility criteria for participants, including criteria at different levels in recruitment/sampling plan (e.g., cities, clinics, subjects)                                                                                          | ✓         | 5-6  |
|                                                                     |          | • Method of recruitment (e.g., referral, self-selection), including the sampling method if a systematic sampling plan was implemented                                                                                                   | ✓         | 5-6  |
|                                                                     |          | • Recruitment setting                                                                                                                                                                                                                   | ✓         | 6,7  |
|                                                                     |          | • Settings and locations where the data were collected                                                                                                                                                                                  | ✓         | 5-6  |
| Interventions                                                       | 4        | • Details of the interventions intended for each study condition and how and when they were actually administered, specifically including:                                                                                              | ✓         | 6-8  |
|                                                                     |          | ○ Content: what was given?                                                                                                                                                                                                              | ✓         | 6-8  |
|                                                                     |          | ○ Delivery method: how was the content given?                                                                                                                                                                                           | ✓         | 6-8  |
|                                                                     |          | ○ Unit of delivery: how were subjects grouped during delivery?                                                                                                                                                                          | ✓         | 6-8  |
|                                                                     |          | ○ Deliverer: who delivered the intervention?                                                                                                                                                                                            | ✓         | 6-8  |
|                                                                     |          | ○ Setting: where was the intervention delivered?                                                                                                                                                                                        | ✓         | 6-8  |
|                                                                     |          | ○ Exposure quantity and duration: how many sessions or episodes or events were intended to be delivered? How long were they intended to last?                                                                                           | ✓         | 6-8  |
|                                                                     |          | ○ Time span: how long was it intended to take to deliver the intervention to each unit?                                                                                                                                                 | ✓         | 6-8  |
| ○ Activities to increase compliance or adherence (e.g., incentives) |          | N/A                                                                                                                                                                                                                                     |           |      |
| Objectives                                                          | 5        | • Specific objectives and hypotheses                                                                                                                                                                                                    | ✓         | 5    |
| Outcomes                                                            | 6        | • Clearly defined primary and secondary outcome measures                                                                                                                                                                                | ✓         | 7-8  |
|                                                                     |          | • Methods used to collect data and any methods used to enhance the quality of measurements                                                                                                                                              | ✓         | 7-8  |
|                                                                     |          | • Information on validated instruments such as psychometric and biometric properties                                                                                                                                                    |           | N/A  |
| Sample size                                                         | 7        | • How sample size was determined and, when applicable, explanation of any interim analyses and stopping rules                                                                                                                           | ✓         | 8    |
| Assignment method                                                   | 8        | • Unit of assignment (the unit being assigned to study condition, e.g., individual, group, community)                                                                                                                                   |           | N/A  |
|                                                                     |          | • Method used to assign units to study conditions, including details of any restriction (e.g., blocking, stratification, minimization)                                                                                                  |           | N/A  |
|                                                                     |          | • Inclusion of aspects employed to help minimize potential bias induced due to non-randomization (e.g., matching)                                                                                                                       |           | N/A  |
| Blinding (masking)                                                  | 9        | • Whether or not participants, those administering the interventions, and those assessing the outcomes were blinded to study condition assignment; if so, statement regarding how the blinding was accomplished and how it was assessed |           | N/A  |
| Unit of Analysis                                                    | 10       | • Description of the smallest unit that is being analysed to assess intervention effects (e.g., individual, group, or community)                                                                                                        | ✓         | 8-9  |
|                                                                     |          | • If the unit of analysis differs from the unit of assignment, the analytical method used to account for this (e.g., adjusting the standard error estimates by the design effect or using multilevel analysis)                          |           | N/A  |
| Statistical methods                                                 | 11       | • Statistical methods used to compare study groups for primary methods outcome(s), including complex methods for correlated data                                                                                                        | ✓         | 8-9  |
|                                                                     |          | • Statistical methods used for additional analyses, such as subgroup analyses and adjusted analysis                                                                                                                                     | ✓         | 8-9  |
|                                                                     |          | • Methods for imputing missing data, if used                                                                                                                                                                                            |           | N/A  |



# TREND Statement Checklist

|                         |    |                                                                                                                                                                                                                                                                                                                                                                                                                                                                                                                                                                                                                                                                                                                                                                                                                                                                                                                                                                                                                                                                                     |   |       |
|-------------------------|----|-------------------------------------------------------------------------------------------------------------------------------------------------------------------------------------------------------------------------------------------------------------------------------------------------------------------------------------------------------------------------------------------------------------------------------------------------------------------------------------------------------------------------------------------------------------------------------------------------------------------------------------------------------------------------------------------------------------------------------------------------------------------------------------------------------------------------------------------------------------------------------------------------------------------------------------------------------------------------------------------------------------------------------------------------------------------------------------|---|-------|
|                         |    | <ul style="list-style-type: none"> <li>Statistical software or programs used</li> </ul>                                                                                                                                                                                                                                                                                                                                                                                                                                                                                                                                                                                                                                                                                                                                                                                                                                                                                                                                                                                             | ✓ | 8-9   |
| <b>RESULTS</b>          |    |                                                                                                                                                                                                                                                                                                                                                                                                                                                                                                                                                                                                                                                                                                                                                                                                                                                                                                                                                                                                                                                                                     |   |       |
| Participant flow        | 12 | <ul style="list-style-type: none"> <li>Flow of participants through each stage of the study: enrollment, assignment, allocation and intervention exposure, follow-up, analysis (a diagram is strongly recommended)               <ul style="list-style-type: none"> <li>Enrollment: the numbers of participants screened for eligibility, found to be eligible or not eligible, declined to be enrolled, and enrolled in the study</li> <li>Assignment: the numbers of participants assigned to a study condition</li> <li>Allocation and intervention exposure: the number of participants assigned to each study condition and the number of participants who received each intervention</li> <li>Follow-up: the number of participants who completed the follow-up or did not complete the follow-up (i.e., lost to follow-up), by study condition</li> <li>Analysis: the number of participants included in or excluded from the main analysis, by study condition</li> </ul> </li> <li>Description of protocol deviations from study as planned, along with reasons</li> </ul> | ✓ | 9     |
| Recruitment             | 13 | <ul style="list-style-type: none"> <li>Dates defining the periods of recruitment and follow-up</li> </ul>                                                                                                                                                                                                                                                                                                                                                                                                                                                                                                                                                                                                                                                                                                                                                                                                                                                                                                                                                                           | ✓ | 9     |
| Baseline data           | 14 | <ul style="list-style-type: none"> <li>Baseline demographic and clinical characteristics of participants in each study condition</li> <li>Baseline characteristics for each study condition relevant to specific disease prevention research</li> <li>Baseline comparisons of those lost to follow-up and those retained, overall and by study condition</li> <li>Comparison between study population at baseline and target population of interest</li> </ul>                                                                                                                                                                                                                                                                                                                                                                                                                                                                                                                                                                                                                      | ✓ | 10    |
| Baseline equivalence    | 15 | <ul style="list-style-type: none"> <li>Data on study group equivalence at baseline and statistical methods used to control for baseline differences</li> </ul>                                                                                                                                                                                                                                                                                                                                                                                                                                                                                                                                                                                                                                                                                                                                                                                                                                                                                                                      |   | N/A   |
| Numbers analyzed        | 16 | <ul style="list-style-type: none"> <li>Number of participants (denominator) included in each analysis for each study condition, particularly when the denominators change for different outcomes; statement of the results in absolute numbers when feasible</li> <li>Indication of whether the analysis strategy was "intention to treat" or, if not, description of how non-compliers were treated in the analyses</li> </ul>                                                                                                                                                                                                                                                                                                                                                                                                                                                                                                                                                                                                                                                     | ✓ | 10-13 |
| Outcomes and estimation | 17 | <ul style="list-style-type: none"> <li>For each primary and secondary outcome, a summary of results for each estimation study condition, and the estimated effect size and a confidence interval to indicate the precision</li> <li>Inclusion of null and negative findings</li> <li>Inclusion of results from testing pre-specified causal pathways through which the intervention was intended to operate, if any</li> </ul>                                                                                                                                                                                                                                                                                                                                                                                                                                                                                                                                                                                                                                                      | ✓ | 10    |
| Ancillary analyses      | 18 | <ul style="list-style-type: none"> <li>Summary of other analyses performed, including subgroup or restricted analyses, indicating which are pre-specified or exploratory</li> </ul>                                                                                                                                                                                                                                                                                                                                                                                                                                                                                                                                                                                                                                                                                                                                                                                                                                                                                                 |   | N/A   |
| Adverse events          | 19 | <ul style="list-style-type: none"> <li>Summary of all important adverse events or unintended effects in each study condition (including summary measures, effect size estimates, and confidence intervals)</li> </ul>                                                                                                                                                                                                                                                                                                                                                                                                                                                                                                                                                                                                                                                                                                                                                                                                                                                               | ✓ | 10    |
| <b>DISCUSSION</b>       |    |                                                                                                                                                                                                                                                                                                                                                                                                                                                                                                                                                                                                                                                                                                                                                                                                                                                                                                                                                                                                                                                                                     |   |       |
| Interpretation          | 20 | <ul style="list-style-type: none"> <li>Interpretation of the results, taking into account study hypotheses, sources of potential bias, imprecision of measures, multiplicative analyses, and other limitations or weaknesses of the study</li> <li>Discussion of results taking into account the mechanism by which the intervention was intended to work (causal pathways) or alternative mechanisms or explanations</li> <li>Discussion of the success of and barriers to implementing the intervention, fidelity of implementation</li> <li>Discussion of research, programmatic, or policy implications</li> </ul>                                                                                                                                                                                                                                                                                                                                                                                                                                                              | ✓ | 14-17 |
| Generalizability        | 21 | <ul style="list-style-type: none"> <li>Generalizability (external validity) of the trial findings, taking into account the study population, the characteristics of the intervention, length of follow-up, incentives, compliance rates, specific sites/settings involved in the study, and other contextual issues</li> </ul>                                                                                                                                                                                                                                                                                                                                                                                                                                                                                                                                                                                                                                                                                                                                                      | ✓ | 14-17 |
| Overall evidence        | 22 | <ul style="list-style-type: none"> <li>General interpretation of the results in the context of current evidence and current theory</li> </ul>                                                                                                                                                                                                                                                                                                                                                                                                                                                                                                                                                                                                                                                                                                                                                                                                                                                                                                                                       | ✓ | 14-17 |

From: Des Jarlais, D. C., Lyles, C., Crepaz, N., & the Trend Group (2004). Improving the reporting quality of nonrandomized evaluations of behavioral and public health interventions: The TREND statement. *American Journal of Public Health*, 94, 361-366. For more information, visit: <http://www.cdc.gov/trendstatement/>
